# Supplementary material for: A Primary Xenograft Model of Small-Cell Lung Cancer Reveals Irreversible Changes in Gene Expression Imposed by Culture In vitro
Source: Oxford University Press journal article supplement (doi:10.1158/0008-5472.can-08-4210), 2009-04-07
Supplement: 00085472can084210-sup-stables_a-h.xls [file 00085472can084210-sup-stables_a-h.xls]

## Sheet: supplTABLE A
SUPPLEMENTARY TABLE A
EGID: Entrez Gene Identifier
SYMBOL: Gene Symbol
GENE NAME: Official Gene Name
ID: Affymetrix Probe Set
logFC: logarithmic transformation (base 2) of the fold-change between groups
AveExpr: logarithmic (base2) average expression for the group
t: moderated t-statistics
P.value: unadjusted P value
adj.P.Val: adjusted P value with the Benjamini-Hochberg method
B: B-statistics, log odds
wXGvsCL: primary xenograft group compared to matched cell line group
1_Differentially Expressed Genes: Probability > 0.88 and absolute FC > 2; wXGvsCL
EGID	SYMBOL	GENENAME	ID	logFC	AveExpr	t	P.Value	adj.P.Val	B
3046	HBE1	hemoglobin, epsilon 1	217683_at	8	7.92	16.59	0	0	26.77
3956	LGALS1	lectin, galactoside-binding, soluble, 1 (galectin 1)	216405_at	5.35	6.79	13.31	0	0	21.84
	NA	NA	217572_at	6.19	8.27	12.6	0	0	20.6
1337	COX6A1	cytochrome c oxidase subunit VIa polypeptide 1	224344_at	3.76	5.54	9.85	0	0	15.13
84701	COX4I2	cytochrome c oxidase subunit IV isoform 2 (lung)	232761_at	3.12	5.04	9.67	0	0	14.71
414	ARSD	arylsulfatase D	232423_at	2.44	4.39	9.25	0	0	13.76
4438	MSH4	mutS homolog 4 (E. coli)	210533_at	1.79	2.97	9.09	0	0	13.4
11211	FZD10	frizzled homolog 10 (Drosophila)	219764_at	3.1	3.5	8.84	0	0	12.82
492	ATP2B3	ATPase, Ca++ transporting, plasma membrane 3	207026_s_at	1.88	3.92	8.6	0	0	12.24
2261	FGFR3	fibroblast growth factor receptor 3 (achondroplasia, thanatophoric dwarfism)	204379_s_at	5.65	4.69	8.26	0	0	11.43
10417	SPON2	spondin 2, extracellular matrix protein	218638_s_at	1.62	4.7	8.26	0	0	11.43
169611	OLFML2A	olfactomedin-like 2A	213075_at	2.86	4.87	7.87	0	0	10.44
4814	NINJ1	ninjurin 1	203045_at	1.43	6.16	7.61	0	0	9.8
83719	YPEL3	yippee-like 3 (Drosophila)	223179_at	2.26	7.37	7.51	0	0	9.54
1028	CDKN1C	cyclin-dependent kinase inhibitor 1C (p57, Kip2)	213183_s_at	3.1	4.49	7.4	0	0	9.25
283143	LOC283143	hypothetical protein LOC283143	239675_at	1.25	3.12	7.38	0	0	9.21
116151	C20orf108	chromosome 20 open reading frame 108	224690_at	3.13	9.07	7.36	0	0	9.17
56243	KIAA1217	KIAA1217	231807_at	2.51	4.03	7.34	0	0	9.11
54806	AHI1	Abelson helper integration site 1	237616_at	1.73	4.44	7.14	0	0	8.58
4647	MYO7A	myosin VIIA	208189_s_at	2.01	5.37	7.04	0	0	8.32
54930	C14orf94	chromosome 14 open reading frame 94	218383_at	1.27	7.86	6.89	0	0	7.94
8228	PNPLA4	patatin-like phospholipase domain containing 4	209739_s_at	3.42	4.69	6.74	0	0	7.53
3911	LAMA5	laminin, alpha 5	210150_s_at	2.14	6.51	6.73	0	0	7.51
23760	PITPNB	phosphatidylinositol transfer protein, beta	235985_at	1.11	7.57	6.67	0	0	7.36
728233	PI4KAP1	phosphatidylinositol 4-kinase, catalytic, alpha pseudogene 1	213408_s_at	1.04	9.47	6.6	0	0	7.18
84171	LOXL4	lysyl oxidase-like 4	227145_at	1.55	4.88	6.51	0	0	6.92
57674	RNF213	ring finger protein 213	230000_at	1.89	5.23	6.48	0	0	6.85
55733	HHAT	hedgehog acyltransferase	1556982_at	1.49	5.48	6.42	0	0	6.68
57714	KIAA1618	KIAA1618	231956_at	2.44	5.24	6.38	0	0	6.58
729652	LOC729652	hypothetical protein LOC729652	1563637_at	2.03	3.58	6.28	0	0	6.31
57799	RAB40C	RAB40C, member RAS oncogene family	242449_at	1.7	5.81	6.26	0	0	6.26
55466	DNAJA4	DnaJ (Hsp40) homolog, subfamily A, member 4	225061_at	4.14	5.21	6.17	0	0	6.01
11343	MGLL	monoglyceride lipase	225102_at	2.5	6.23	6.12	0	0	5.88
50649	ARHGEF4	Rho guanine nucleotide exchange factor (GEF) 4	205109_s_at	2.52	4.64	6.09	0	0	5.81
124602	KIF19	kinesin family member 19	1553314_a_at	2.66	4.37	6.08	0	0	5.78
11178	LZTS1	leucine zipper, putative tumor suppressor 1	47550_at	2.05	6.33	6.04	0	0	5.66
55876	GSDML	gasdermin-like	215659_at	1.34	4.37	6.02	0	0	5.61
56252	YLPM1	YLP motif containing 1	243310_at	1.82	6.14	6	0	0	5.55
26576	SRPK3	SFRS protein kinase 3	206216_at	2.25	5.53	6	0	0	5.55
339488	TFAP2E	transcription factor AP-2 epsilon (activating enhancer binding protein 2 epsilon)	1555348_at	1.87	5.14	5.99	0	0	5.52
22837	COBLL1	COBL-like 1	243039_at	1.48	4.6	5.97	0	0	5.46
26053	AUTS2	autism susceptibility candidate 2	215386_at	1.93	5.25	5.96	0	0	5.45
54361	WNT4	wingless-type MMTV integration site family, member 4	208606_s_at	2.65	3.87	5.94	0	0	5.4
130872	AHSA2	AHA1, activator of heat shock 90kDa protein ATPase homolog 2 (yeast)	226665_at	1.52	6.66	5.93	0	0	5.36
200014	CC2D1B	coiled-coil and C2 domain containing 1B	237337_at	1.04	4.93	5.93	0	0	5.35
10140	TOB1	transducer of ERBB2, 1	202704_at	1.72	8.49	5.92	0	0	5.33
4670	HNRPM	heterogeneous nuclear ribonucleoprotein M	1555843_at	1.47	6.52	5.9	0	0	5.27
23037	PDZD2	PDZ domain containing 2	233025_at	2.21	3.68	5.88	0	0	5.24
53905	DUOX1	dual oxidase 1	219597_s_at	1.28	4.29	5.88	0	0	5.23
8726	EED	embryonic ectoderm development	210656_at	1.67	4.63	5.84	0	0	5.13
509	ATP5C1	ATP synthase, H+ transporting, mitochondrial F1 complex, gamma polypeptide 1	214132_at	1.12	6.11	5.84	0	0	5.11
23523	CABIN1	calcineurin binding protein 1	1557580_at	1.24	5.08	5.81	0	0	5.03
1299	COL9A3	collagen, type IX, alpha 3	204724_s_at	3.71	4.52	5.81	0	0	5.03
2820	GPD2	glycerol-3-phosphate dehydrogenase 2 (mitochondrial)	225447_at	5.5	6.88	5.8	0	0	5.03
23396	PIP5K1C	phosphatidylinositol-4-phosphate 5-kinase, type I, gamma	212518_at	1.05	7.08	5.76	0	0	4.91
132946	ARL9	ADP-ribosylation factor-like 9	229062_at	2.24	4.94	5.71	0	0	4.78
4249	MGAT5	mannosyl (alpha-1,6-)-glycoprotein beta-1,6-N-acetyl-glucosaminyltransferase	215528_at	2.58	6.52	5.7	0	0	4.74
9282	MED14	mediator complex subunit 14	1569449_a_at	1.05	4.06	5.67	0	0	4.66
283131	TncRNA	trophoblast-derived noncoding RNA	234989_at	4.11	5.99	5.67	0	0	4.66
4986	OPRK1	opioid receptor, kappa 1	207553_at	2.37	4.2	5.67	0	0	4.65
8028	MLLT10	myeloid/lymphoid or mixed-lineage leukemia (trithorax homolog, Drosophila); translocated to, 10	243003_at	1.71	7.2	5.66	0	0	4.63
57007	CXCR7	chemokine (C-X-C motif) receptor 7	212977_at	4.89	4.31	5.66	0	0	4.63
5256	PHKA2	phosphorylase kinase, alpha 2 (liver)	209439_s_at	1	7.49	5.65	0	0	4.62
8897	MTMR3	myotubularin related protein 3	240271_at	1.86	5.15	5.64	0	0	4.57
54875	CNTLN	centlein, centrosomal protein	220095_at	2.11	5.27	5.63	0	0	4.55
9945	GFPT2	glutamine-fructose-6-phosphate transaminase 2	205100_at	1.36	4.29	5.62	0	0	4.53
9509	ADAMTS2	ADAM metallopeptidase with thrombospondin type 1 motif, 2	236901_at	3.41	3.99	5.61	0	0	4.51
4666	NACA	nascent polypeptide-associated complex alpha subunit	222018_at	1.21	7.12	5.6	0	0	4.48
7153	TOP2A	topoisomerase (DNA) II alpha 170kDa	237469_at	1.51	5.43	5.6	0	0	4.48
5164	PDK2	pyruvate dehydrogenase kinase, isozyme 2	202590_s_at	1.09	5.94	5.6	0	0	4.46
2990	GUSB	glucuronidase, beta	202605_at	1.08	9.67	5.59	0	0	4.44
55857	C20orf19	chromosome 20 open reading frame 19	228290_at	1.67	5.9	5.58	0	0	4.42
220	ALDH1A3	aldehyde dehydrogenase 1 family, member A3	203180_at	2.2	4.16	5.57	0	0	4.39
26048	ZNF500	zinc finger protein 500	213641_at	1.29	5.67	5.56	0	0	4.36
64405	CDH22	cadherin-like 22	215181_at	1.4	6.36	5.53	0	0	4.28
83666	PARP9	poly (ADP-ribose) polymerase family, member 9	223220_s_at	2.14	4.77	5.52	0	0	4.25
140901	STK35	serine/threonine kinase 35	1562505_at	1.86	5.15	5.5	0	0	4.19
23353	UNC84A	unc-84 homolog A (C. elegans)	206487_at	1.49	6.19	5.49	0	0	4.18
440995	LOC440995	hypothetical gene supported by BC034933; BC068085	235911_at	2.9	6.99	5.48	0	0	4.13
84186	ZCCHC7	zinc finger, CCHC domain containing 7	230332_at	1.71	7.82	5.47	0	0	4.1
23654	PLXNB2	plexin B2	208890_s_at	2.32	7.55	5.46	0	0	4.08
22903	BTBD3	BTB (POZ) domain containing 3	243461_at	1.77	5.86	5.46	0	0	4.08
4241	MFI2	antigen p97 (melanoma associated) identified by monoclonal antibodies 133.2 and 96.5	243629_x_at	1.58	6.72	5.45	0	0	4.07
8651	SOCS1	suppressor of cytokine signaling 1	210001_s_at	2.94	4.6	5.44	0	0	4.02
283666	LOC283666	hypothetical LOC283666	235567_at	1.67	4.03	5.43	0	0	4.02
150368	FAM109B	family with sequence similarity 109, member B	226504_at	1.79	4.84	5.41	0	0	3.94
80325	ABTB1	ankyrin repeat and BTB (POZ) domain containing 1	229164_s_at	1.99	6.12	5.4	0	0	3.92
11030	RBPMS	RNA binding protein with multiple splicing	241897_at	1.03	3.51	5.39	0	0	3.89
10048	RANBP9	RAN binding protein 9	242143_at	1.44	6.89	5.38	0	0	3.88
54549	SDK2	sidekick homolog 2 (chicken)	242064_at	3.22	7.32	5.37	0	0	3.85
56961	SHD	Src homology 2 domain containing transforming protein D	227845_s_at	2.47	4.43	5.37	0	0	3.85
283120	H19	H19, imprinted maternally expressed transcript	224997_x_at	4.96	4.61	5.37	0	0	3.84
6670	SP3	Sp3 transcription factor	232529_at	1.78	6.1	5.37	0	0	3.84
4842	NOS1	nitric oxide synthase 1 (neuronal)	239132_at	2	3.33	5.36	0	0	3.82
64773	FAM113A	family with sequence similarity 113, member A	231965_at	1.03	4.05	5.36	0	0	3.8
162494	RHBDL3	rhomboid, veinlet-like 3 (Drosophila)	233409_at	2.03	6.07	5.35	0	0	3.8
2966	GTF2H2	general transcription factor IIH, polypeptide 2, 44kDa	215470_at	2.21	7.69	5.35	0	0	3.78
758	MPPED1	metallophosphoesterase domain containing 1	206436_at	1.47	5.24	5.34	0	0	3.75
899	CCNF	cyclin F	1559936_at	1.33	3.59	5.33	0	0	3.73
10013	HDAC6	histone deacetylase 6	206846_s_at	1.37	7.94	5.32	0	0	3.72
6468	FBXW4	F-box and WD repeat domain containing 4	221519_at	1.25	6.71	5.3	0	0	3.64
6095	RORA	RAR-related orphan receptor A	1562529_s_at	2.06	5.21	5.28	0	0	3.6
8906	AP1G2	adaptor-related protein complex 1, gamma 2 subunit	201613_s_at	1.81	7.93	5.28	0	0	3.59
493754	LOC493754	RAB guanine nucleotide exchange factor (GEF) 1 pseudogene	1569296_a_at	1.25	4.88	5.28	0	0	3.58
9378	NRXN1	neurexin 1	233424_at	3.16	6.78	5.26	0	0	3.54
83541	FAM110A	family with sequence similarity 110, member A	226584_s_at	2.45	6.25	5.26	0	0	3.53
57506	VISA	virus-induced signaling adapter	226495_at	1.07	8.15	5.25	0	0	3.52
84901	NFATC2IP	nuclear factor of activated T-cells, cytoplasmic, calcineurin-dependent 2 interacting protein	217526_at	1.38	8.23	5.24	0	0	3.49
23008	KIAA0265	KIAA0265 protein	238000_at	1.57	5.42	5.24	0	0	3.49
84628	NTNG2	netrin G2	233072_at	1.75	4.9	5.22	0	0	3.43
158947	ARMCX4	armadillo repeat containing, X-linked 4	1552327_at	1.84	4.66	5.21	0	0	3.4
9766	KIAA0247	KIAA0247	202181_at	2.34	7.93	5.2	0	0	3.38
157285	PRAGMIN	homolog of rat pragma of Rnd2	240690_at	1.83	4.74	5.19	0	0	3.36
10150	MBNL2	muscleblind-like 2 (Drosophila)	230688_at	1.69	4.29	5.18	0	0	3.31
79716	NPEPL1	aminopeptidase-like 1	218821_at	1.53	6.17	5.16	0	0	3.27
9951	HS3ST4	heparan sulfate (glucosamine) 3-O-sulfotransferase 4	1570272_at	1.03	3.31	5.16	0	0	3.27
58190	CTDSP1	CTD (carboxy-terminal domain, RNA polymerase II, polypeptide A) small phosphatase 1	217844_at	1.08	6.51	5.15	0	0	3.24
10114	HIPK3	homeodomain interacting protein kinase 3	226297_at	1.31	8.6	5.13	0	0	3.19
1018	CDK3	cyclin-dependent kinase 3	229468_at	1	6.99	5.13	0	0	3.19
64856	VWA1	von Willebrand factor A domain containing 1	218731_s_at	1.32	5.42	5.13	0	0	3.17
84617	TUBB6	tubulin, beta 6	238151_at	1.18	3.71	5.12	0	0	3.16
399491	LOC399491	LOC399491 protein	214682_at	1.25	6.06	5.11	0	0	3.14
7410	VAV2	vav 2 guanine nucleotide exchange factor	226063_at	2.02	7.09	5.11	0	0	3.13
23112	TNRC6B	trinucleotide repeat containing 6B	237895_at	1.19	6.63	5.1	0	0	3.1
728411	LOC728411	similar to Beta-glucuronidase precursor	213605_s_at	1.83	10.14	5.08	0	0	3.06
57666	KIAA1545	KIAA1545 protein	1557539_at	1.26	4.75	5.08	0	0	3.06
4763	NF1	neurofibromin 1 (neurofibromatosis, von Recklinghausen disease, Watson disease)	216115_at	1.33	5.9	5.08	0	0	3.04
6091	ROBO1	roundabout, axon guidance receptor, homolog 1 (Drosophila)	1558714_at	2.1	6.77	5.06	0	0	3
7852	CXCR4	chemokine (C-X-C motif) receptor 4	217028_at	4.22	8.27	5.06	0	0	2.99
114818	KLHL29	kelch-like 29 (Drosophila)	1562144_at	1.58	6.14	5.05	0	0	2.96
90187	EMILIN3	elastin microfibril interfacer 3	228307_at	1.44	6.22	5.04	0	0	2.94
64847	SPATA20	spermatogenesis associated 20	218164_at	1.82	5.96	5.03	0	0	2.92
7205	TRIP6	thyroid hormone receptor interactor 6	209129_at	2.16	5.36	5.01	0	0	2.87
10659	CUGBP2	CUG triplet repeat, RNA binding protein 2	242268_at	1.4	3.6	5	0	0	2.84
57475	PLEKHH1	pleckstrin homology domain containing, family H (with MyTH4 domain) member 1	225727_at	1.86	5.41	5	0	0	2.83
497257	LOC497257	hypothetical LOC497257	1568780_at	3.37	5.27	5	0	0	2.83
1465	CSRP1	cysteine and glycine-rich protein 1	200621_at	3.44	8.01	5	0	0	2.82
11064	CEP110	centrosomal protein 110kDa	205642_at	1.2	6.22	4.99	0	0	2.81
1822	ATN1	atrophin 1	236961_at	1.4	6.44	4.99	0	0	2.81
23041	MON2	MON2 homolog (S. cerevisiae)	242225_at	1.13	5.68	4.99	0	0	2.8
153478	PLEKHG4B	pleckstrin homology domain containing, family G (with RhoGef domain) member 4B	230441_at	3.83	5.56	4.97	0	0	2.76
57412	AS3MT	arsenic (+3 oxidation state) methyltransferase	223652_at	2.36	6.2	4.96	0	0	2.73
114823	LENG8	leukocyte receptor cluster (LRC) member 8	224673_at	1.44	6.91	4.92	0	0	2.62
5583	PRKCH	protein kinase C, eta	1559425_at	2.73	4.46	4.92	0	0	2.61
255967	PAN3	PAN3 polyA specific ribonuclease subunit homolog (S. cerevisiae)	239597_at	1.62	6.44	4.92	0	0	2.61
140876	C20orf175	chromosome 20 open reading frame 175	227654_at	1.84	3.44	4.92	0	0	2.6
1457	CSNK2A1	casein kinase 2, alpha 1 polypeptide	239228_at	1.36	6.9	4.91	0	0	2.6
25959	KANK2	KN motif and ankyrin repeat domains 2	218418_s_at	2.6	6.62	4.91	0	0	2.57
153561	GUSBP1	glucuronidase, beta pseudogene 1	213089_at	1.71	8.25	4.9	0	0	2.56
284131	FLJ35220	hypothetical protein FLJ35220	229939_at	1.06	6.21	4.89	0	0	2.54
120376	LOC120376	hypothetical protein LOC120376	228338_at	3.28	4.89	4.89	0	0	2.54
6525	SMTN	smoothelin	209427_at	1.17	6.24	4.89	0	0	2.53
23649	POLA2	polymerase (DNA directed), alpha 2 (70kD subunit)	244575_at	1.34	4.9	4.88	0	0	2.51
23389	MED13L	mediator complex subunit 13-like	238883_at	1.59	7.32	4.88	0	0	2.49
10106	CTDSP2	CTD (carboxy-terminal domain, RNA polymerase II, polypeptide A) small phosphatase 2	203445_s_at	1.33	8.35	4.87	0	0	2.48
9736	USP34	ubiquitin specific peptidase 34	233595_at	1.18	7.75	4.87	0	0	2.47
2342	FNTB	farnesyltransferase, CAAX box, beta	1568865_at	1.47	5.3	4.83	0	0	2.37
901	CCNG2	cyclin G2	202769_at	1.05	9.09	4.82	0	0	2.33
9500	MAGED1	melanoma antigen family D, 1	244878_at	1.74	5.08	4.81	0	0	2.31
8502	PKP4	plakophilin 4	236752_at	1.47	7.95	4.81	0	0	2.3
150696	PROM2	prominin 2	1552797_s_at	2.09	3.54	4.8	0	0	2.3
8408	ULK1	unc-51-like kinase 1 (C. elegans)	238042_at	1.12	5.8	4.8	0	0	2.3
11078	TRIOBP	TRIO and F-actin binding protein	1552334_at	1.6	5.28	4.8	0	0	2.29
26119	LDLRAP1	low density lipoprotein receptor adaptor protein 1	221790_s_at	2.4	4.67	4.8	0	0	2.29
80258	EFHC2	EF-hand domain (C-terminal) containing 2	220591_s_at	2.26	3.51	4.79	0	0	2.27
10124	ARL4A	ADP-ribosylation factor-like 4A	205020_s_at	1.41	7.85	4.79	0	0	2.27
89797	NAV2	neuron navigator 2	1556606_at	1.61	3.19	4.79	0	0	2.25
253959	GARNL1	GTPase activating Rap/RanGAP domain-like 1	215162_at	1.15	4.55	4.78	0	0	2.24
7094	TLN1	talin 1	203254_s_at	1.03	6.12	4.78	0	0	2.24
94235	GNG8	guanine nucleotide binding protein (G protein), gamma 8	234284_at	4.94	4.78	4.78	0	0	2.24
126969	SLC44A3	solute carrier family 44, member 3	228221_at	2.34	5.39	4.78	0	0	2.22
55240	STEAP3	STEAP family member 3	218424_s_at	2.58	7.11	4.77	0	0	2.21
3664	IRF6	interferon regulatory factor 6	202597_at	2.49	5.64	4.77	0	0	2.2
339745	SPOPL	speckle-type POZ protein-like	243170_at	1.24	4.97	4.76	0	0	2.19
56937	TMEPAI	transmembrane, prostate androgen induced RNA	217875_s_at	1.85	5.49	4.76	0	0	2.19
128338	TMEM77	transmembrane protein 77	236883_at	1.01	6.27	4.76	0	0	2.19
3487	IGFBP4	insulin-like growth factor binding protein 4	201508_at	2.79	5.44	4.76	0	0	2.18
5599	MAPK8	mitogen-activated protein kinase 8	243280_at	1.58	6.24	4.75	0	0	2.16
25878	MXRA5	matrix-remodelling associated 5	209596_at	3.3	3.92	4.75	0	0	2.15
5690	PSMB2	proteasome (prosome, macropain) subunit, beta type, 2	231323_at	1.15	3.09	4.75	0	0	2.14
4712	NDUFB6	NADH dehydrogenase (ubiquinone) 1 beta subcomplex, 6, 17kDa	1559042_at	1.12	3.9	4.75	0	0	2.14
83999	KREMEN1	kringle containing transmembrane protein 1	227250_at	2.08	6.19	4.74	0	0	2.13
57658	CALCOCO1	calcium binding and coiled-coil domain 1	209002_s_at	1.03	6.63	4.74	0	0	2.13
647065	LOC647065	hypothetical LOC647065	233440_at	1.41	6.06	4.74	0	0	2.12
4651	MYO10	myosin X	201976_s_at	2.63	8.18	4.73	0	0	2.11
54996	MOSC2	MOCO sulphurase C-terminal domain containing 2	227417_at	2.02	4.39	4.73	0	0	2.1
492311	LOC492311	similar to bovine IgA regulatory protein	226977_at	1.24	6.72	4.72	0	0	2.07
90634	N4BP2L1	NEDD4 binding protein 2-like 1	213375_s_at	2.73	5.3	4.72	0	0	2.07
10397	NDRG1	N-myc downstream regulated gene 1	240991_at	1.93	5.28	4.71	0	0	2.04
10241	CALCOCO2	calcium binding and coiled-coil domain 2	238560_at	1.08	4.98	4.7	0	0	2.03
4719	NDUFS1	NADH dehydrogenase (ubiquinone) Fe-S protein 1, 75kDa (NADH-coenzyme Q reductase)	1559691_at	1.29	4.51	4.7	0	0	2.03
8837	CFLAR	CASP8 and FADD-like apoptosis regulator	209939_x_at	1.57	7.48	4.7	0	0	2.02
201163	FLCN	folliculin	215645_at	1.26	6.14	4.7	0	0	2
83943	IMMP2L	IMP2 inner mitochondrial membrane peptidase-like (S. cerevisiae)	1558410_s_at	1.64	6.77	4.7	0	0	2
25890	ABI3BP	ABI gene family, member 3 (NESH) binding protein	223395_at	-1.98	4.15	-4.7	0	0	2.01
55239	OGFOD1	2-oxoglutarate and iron-dependent oxygenase domain containing 1	225106_s_at	-1.56	8.33	-4.7	0	0	2.02
7014	TERF2	telomeric repeat binding factor 2	229790_at	-1.07	5.75	-4.7	0	0	2.03
84062	DTNBP1	dystrobrevin binding protein 1	223445_at	-1.05	7.91	-4.71	0	0	2.03
3313	HSPA9	heat shock 70kDa protein 9 (mortalin)	200690_at	-1.24	7.56	-4.71	0	0	2.04
55500	ETNK1	ethanolamine kinase 1	222262_s_at	-1.44	6.86	-4.71	0	0	2.06
56660	KCNK12	potassium channel, subfamily K, member 12	220448_at	-1.44	4.96	-4.74	0	0	2.13
57105	CYSLTR2	cysteinyl leukotriene receptor 2	220813_at	-1.34	4.69	-4.74	0	0	2.13
6301	SARS	seryl-tRNA synthetase	200802_at	-1.24	10.05	-4.75	0	0	2.15
51642	MRPL48	mitochondrial ribosomal protein L48	218281_at	-1.17	8.87	-4.76	0	0	2.17
25915	C3orf60	chromosome 3 open reading frame 60	209177_at	-1.31	8.81	-4.77	0	0	2.2
4134	MAP4	microtubule-associated protein 4	235066_at	-1.9	4.17	-4.78	0	0	2.24
55791	C1orf103	chromosome 1 open reading frame 103	220235_s_at	-1.64	7.71	-4.78	0	0	2.25
23200	ATP11B	ATPase, class VI, type 11B	1554557_at	-1.08	5.56	-4.79	0	0	2.26
56341	PRMT8	protein arginine methyltransferase 8	230839_at	-1.14	4.63	-4.8	0	0	2.3
10963	STIP1	stress-induced-phosphoprotein 1 (Hsp70/Hsp90-organizing protein)	212009_s_at	-1.3	9.93	-4.81	0	0	2.32
54849	DEF8	differentially expressed in FDCP 8 homolog (mouse)	219646_at	-1.3	7.62	-4.82	0	0	2.34
8674	VAMP4	vesicle-associated membrane protein 4	211760_s_at	-1.14	6.2	-4.82	0	0	2.34
2257	FGF12	fibroblast growth factor 12	207501_s_at	-2.51	6.4	-4.83	0	0	2.38
1737	DLAT	dihydrolipoamide S-acetyltransferase	213149_at	-1.3	8.09	-4.83	0	0	2.38
51520	LARS	leucyl-tRNA synthetase	223888_s_at	-1.44	7.05	-4.84	0	0	2.4
29078	C6orf66	chromosome 6 open reading frame 66	219006_at	-1.47	9.42	-4.86	0	0	2.44
23271	CAMSAP1L1	calmodulin regulated spectrin-associated protein 1-like 1	212763_at	-1.36	6.35	-4.86	0	0	2.44
11157	LSM6	LSM6 homolog, U6 small nuclear RNA associated (S. cerevisiae)	205036_at	-1.24	9.18	-4.86	0	0	2.45
8467	SMARCA5	SWI/SNF related, matrix associated, actin dependent regulator of chromatin, subfamily a, member 5	213859_x_at	-1.02	7.48	-4.88	0	0	2.51
894	CCND2	cyclin D2	231259_s_at	-1.8	4.25	-4.88	0	0	2.51
88745	C6orf153	chromosome 6 open reading frame 153	225788_at	-1.27	8.74	-4.89	0	0	2.54
1717	DHCR7	7-dehydrocholesterol reductase	201790_s_at	-1.28	7.94	-4.9	0	0	2.56
153339	TMEM167	transmembrane protein 167	226276_at	-1.31	9.22	-4.9	0	0	2.57
9709	HERPUD1	homocysteine-inducible, endoplasmic reticulum stress-inducible, ubiquitin-like domain member 1	217168_s_at	-1.15	9.5	-4.92	0	0	2.62
79577	CDC73	cell division cycle 73, Paf1/RNA polymerase II complex component, homolog (S. cerevisiae)	218578_at	-1.11	7.62	-4.95	0	0	2.69
1977	EIF4E	eukaryotic translation initiation factor 4E	201435_s_at	-1.14	9.53	-4.95	0	0	2.69
55330	CNO	cappuccino homolog (mouse)	223431_at	-1.18	7.46	-4.96	0	0	2.73
3475	IFRD1	interferon-related developmental regulator 1	202147_s_at	-1.29	9.15	-4.97	0	0	2.75
27125	AFF4	AF4/FMR2 family, member 4	243487_at	-1.08	4.99	-4.97	0	0	2.76
81831	NETO2	neuropilin (NRP) and tolloid (TLL)-like 2	222774_s_at	-1.25	8.55	-4.97	0	0	2.76
5910	RAP1GDS1	RAP1, GTP-GDP dissociation stimulator 1	217457_s_at	-1.3	7.84	-4.97	0	0	2.76
29968	PSAT1	phosphoserine aminotransferase 1	220892_s_at	-1.8	9.01	-4.99	0	0	2.79
51091	SEPSECS	Sep (O-phosphoserine) tRNA:Sec (selenocysteine) tRNA synthase	1553167_a_at	-1.16	5.25	-4.99	0	0	2.81
57650	KIAA1524	KIAA1524	1553810_a_at	-1.28	5.15	-5	0	0	2.82
55435	C4orf16	chromosome 4 open reading frame 16	242753_x_at	-1.3	4.74	-5.01	0	0	2.85
60481	ELOVL5	ELOVL family member 5, elongation of long chain fatty acids (FEN1/Elo2, SUR4/Elo3-like, yeast)	208788_at	-1.03	10.45	-5.02	0	0	2.87
65008	MRPL1	mitochondrial ribosomal protein L1	223154_at	-1.65	8.94	-5.03	0	0	2.91
10342	TFG	TRK-fused gene	221871_s_at	-1.22	5.8	-5.04	0	0	2.94
60559	SPCS3	signal peptidase complex subunit 3 homolog (S. cerevisiae)	218817_at	-2.07	6.75	-5.05	0	0	2.96
55216	C11orf57	chromosome 11 open reading frame 57	230724_s_at	-1.26	6.45	-5.06	0	0	2.98
161742	SPRED1	sprouty-related, EVH1 domain containing 1	244439_at	-1.75	4.1	-5.06	0	0	3
25819	CCRN4L	CCR4 carbon catabolite repression 4-like (S. cerevisiae)	1554283_at	-1.56	4.26	-5.08	0	0	3.05
134957	STXBP5	syntaxin binding protein 5 (tomosyn)	226794_at	-1.71	4.72	-5.08	0	0	3.06
9255	SCYE1	small inducible cytokine subfamily E, member 1 (endothelial monocyte-activating)	202541_at	-1.16	8.64	-5.08	0	0	3.06
255520	ELMOD2	ELMO/CED-12 domain containing 2	1553928_at	-1.25	6.94	-5.09	0	0	3.06
8503	PIK3R3	phosphoinositide-3-kinase, regulatory subunit 3 (gamma)	211580_s_at	-1	7.13	-5.09	0	0	3.07
4597	MVD	mevalonate (diphospho) decarboxylase	203027_s_at	-1.17	5.43	-5.1	0	0	3.1
84264	HAGHL	hydroxyacylglutathione hydrolase-like	223485_at	-1.08	6.58	-5.12	0	0	3.16
80308	FLAD1	FAD1 flavin adenine dinucleotide synthetase homolog (S. cerevisiae)	205661_s_at	-1.37	7.81	-5.17	0	0	3.31
26521	TIMM8B	translocase of inner mitochondrial membrane 8 homolog B (yeast)	223478_at	-1.19	7.73	-5.18	0	0	3.32
54989	ZNF770	zinc finger protein 770	238687_x_at	-1.13	4.47	-5.19	0	0	3.35
25939	SAMHD1	SAM domain and HD domain 1	1559883_s_at	-1.47	5.88	-5.2	0	0	3.37
1491	CTH	cystathionase (cystathionine gamma-lyase)	206085_s_at	-2.54	5.68	-5.23	0	0	3.46
2110	ETFDH	electron-transferring-flavoprotein dehydrogenase	205530_at	-1.12	5.68	-5.23	0	0	3.47
26036	ZNF451	zinc finger protein 451	231869_at	-1.31	7.02	-5.23	0	0	3.47
91298	C12orf29	chromosome 12 open reading frame 29	228378_at	-1.17	8.04	-5.24	0	0	3.48
890	CCNA2	cyclin A2	203418_at	-1.11	8.77	-5.24	0	0	3.49
50999	TMED5	transmembrane emp24 protein transport domain containing 5	202195_s_at	-1.47	7.65	-5.25	0	0	3.5
285613	RELL2	RELT-like 2	1564031_a_at	-1.31	6.23	-5.26	0	0	3.55
142940	TRUB1	TruB pseudouridine (psi) synthase homolog 1 (E. coli)	241606_s_at	-1.23	5.47	-5.26	0	0	3.55
8835	SOCS2	suppressor of cytokine signaling 2	203372_s_at	-3.82	6.1	-5.28	0	0	3.6
79659	DYNC2H1	dynein, cytoplasmic 2, heavy chain 1	1561939_at	-1.96	3.94	-5.29	0	0	3.62
1182	CLCN3	chloride channel 3	201735_s_at	-1.46	8.87	-5.29	0	0	3.63
84259	DCUN1D5	DCN1, defective in cullin neddylation 1, domain containing 5 (S. cerevisiae)	223151_at	-1.51	10.16	-5.29	0	0	3.63
261726	TIPRL	TIP41, TOR signaling pathway regulator-like (S. cerevisiae)	1554351_a_at	-1.18	8.04	-5.3	0	0	3.65
51304	ZDHHC3	zinc finger, DHHC-type containing 3	218078_s_at	-1.09	6.87	-5.3	0	0	3.65
55161	TMEM33	transmembrane protein 33	222642_s_at	-2.23	7.77	-5.31	0	0	3.67
2222	FDFT1	farnesyl-diphosphate farnesyltransferase 1	208647_at	-1.61	10.63	-5.32	0	0	3.72
60496	AASDHPPT	aminoadipate-semialdehyde dehydrogenase-phosphopantetheinyl transferase	202170_s_at	-1.4	9.32	-5.37	0	0	3.85
56479	KCNQ5	potassium voltage-gated channel, KQT-like subfamily, member 5	223891_at	-1.92	3.74	-5.38	0	0	3.87
8065	CUL5	cullin 5	203532_x_at	-1.09	6.76	-5.39	0	0	3.89
51022	GLRX2	glutaredoxin 2	219933_at	-1.67	8.39	-5.4	0	0	3.93
84640	USP38	ubiquitin specific peptidase 38	223289_s_at	-1.19	7.4	-5.4	0	0	3.94
427	ASAH1	N-acylsphingosine amidohydrolase (acid ceramidase) 1	1555419_a_at	-2.03	8.53	-5.48	0	0	4.13
64854	USP46	ubiquitin specific peptidase 46	203869_at	-1.94	7.21	-5.48	0	0	4.15
11278	KLF12	Kruppel-like factor 12	214276_at	-1.46	5.88	-5.5	0	0	4.2
3093	UBE2K	ubiquitin-conjugating enzyme E2K (UBC1 homolog, yeast)	202347_s_at	-1.06	9.35	-5.51	0	0	4.23
25898	RCHY1	ring finger and CHY zinc finger domain containing 1	212749_s_at	-1.37	8.48	-5.52	0	0	4.24
23545	ATP6V0A2	ATPase, H+ transporting, lysosomal V0 subunit a2	235255_at	-1.08	5.79	-5.54	0	0	4.3
8539	API5	apoptosis inhibitor 5	214959_s_at	-1.02	7.81	-5.55	0	0	4.32
152559	PAQR3	progestin and adipoQ receptor family member III	213372_at	-1.69	7.98	-5.63	0	0	4.55
1595	CYP51A1	cytochrome P450, family 51, subfamily A, polypeptide 1	202314_at	-1.27	8.89	-5.64	0	0	4.58
29953	TRHDE	thyrotropin-releasing hormone degrading enzyme	219937_at	-3.05	4.33	-5.68	0	0	4.68
57606	SLAIN2	SLAIN motif family, member 2	224853_at	-1.07	5.51	-5.7	0	0	4.75
10808	HSPH1	heat shock 105kDa/110kDa protein 1	208744_x_at	-1.58	9.8	-5.75	0	0	4.86
7424	VEGFC	vascular endothelial growth factor C	209946_at	-2.65	4.03	-5.77	0	0	4.94
39	ACAT2	acetyl-Coenzyme A acetyltransferase 2	209608_s_at	-1.31	9.61	-5.78	0	0	4.96
26515	FXC1	fracture callus 1 homolog (rat)	217981_s_at	-1.15	8.07	-5.8	0	0	5.03
8898	MTMR2	myotubularin related protein 2	203211_s_at	-1.03	9.07	-5.88	0	0	5.24
27068	PPA2	pyrophosphatase (inorganic) 2	1556285_s_at	-1.45	8.98	-5.91	0	0	5.32
51399	TRAPPC4	trafficking protein particle complex 4	217959_s_at	-1.16	9.52	-5.92	0	0	5.33
84817	TXNDC17	thioredoxin domain containing 17	228743_at	-1.21	6.06	-5.93	0	0	5.36
55863	TMEM126B	transmembrane protein 126B	221622_s_at	-1.08	10.13	-5.93	0	0	5.38
283237	TTC9C	tetratricopeptide repeat domain 9C	226175_at	-1.11	7.89	-6.08	0	0	5.77
467	ATF3	activating transcription factor 3	1554980_a_at	-1.36	6.62	-6.11	0	0	5.84
4085	MAD2L1	MAD2 mitotic arrest deficient-like 1 (yeast)	1554768_a_at	-1.27	9.99	-6.16	0	0	6
23244	PDS5A	PDS5, regulator of cohesion maintenance, homolog A (S. cerevisiae)	213983_s_at	-1.33	7.12	-6.31	0	0	6.39
440	ASNS	asparagine synthetase	205047_s_at	-1.75	10.29	-6.31	0	0	6.4
84706	GPT2	glutamic pyruvate transaminase (alanine aminotransferase) 2	224839_s_at	-1.6	6.6	-6.34	0	0	6.47
1004	CDH6	cadherin 6, type 2, K-cadherin (fetal kidney)	205533_s_at	-1.44	2.79	-6.37	0	0	6.55
2230	FDX1	ferredoxin 1	203647_s_at	-1.1	8.88	-6.46	0	0	6.8
5481	PPID	peptidylprolyl isomerase D (cyclophilin D)	204185_x_at	-1.5	9.46	-6.47	0	0	6.82
833	CARS	cysteinyl-tRNA synthetase	240983_s_at	-1.67	7.16	-6.51	0	0	6.93
3156	HMGCR	3-hydroxy-3-methylglutaryl-Coenzyme A reductase	202539_s_at	-1.46	8.92	-6.54	0	0	7.02
84437	KIAA1826	KIAA1826	227418_at	-1.14	8.08	-6.75	0	0	7.56
83667	SESN2	sestrin 2	223195_s_at	-1.99	6.78	-6.81	0	0	7.73
11221	DUSP10	dual specificity phosphatase 10	221563_at	-1.87	6.83	-6.81	0	0	7.74
6307	SC4MOL	sterol-C4-methyl oxidase-like	209146_at	-1.95	9.5	-6.95	0	0	8.09
3157	HMGCS1	3-hydroxy-3-methylglutaryl-Coenzyme A synthase 1 (soluble)	205822_s_at	-2.35	8.7	-6.98	0	0	8.16
81579	PLA2G12A	phospholipase A2, group XIIA	221027_s_at	-1.74	7.03	-7.25	0	0	8.86
4141	MARS	methionyl-tRNA synthetase	201475_x_at	-1.21	9.45	-7.78	0	0	10.24
6713	SQLE	squalene epoxidase	213562_s_at	-1.97	7.9	-8.04	0	0	10.88
79094	CHAC1	ChaC, cation transport regulator homolog 1 (E. coli)	219270_at	-2.34	5.97	-8.25	0	0	11.4
23657	SLC7A11	solute carrier family 7, (cationic amino acid transporter, y+ system) member 11	209921_at	-4.05	6.91	-11.46	0	0	18.47

## Sheet: supplTABLE B
SUPPLEMENTARY TABLE B
EGID: Entrez Gene Identifier
SYMBOL: Gene Symbol
GENE NAME: Official Gene Name
ID: Affymetrix Probe Set
logFC: logarithmic transformation (base 2) of the fold-change between groups
AveExpr: logarithmic (base2) average expression for the group
t: moderated t-statistics
P.value: unadjusted P value
adj.P.Val: adjusted P value with the Benjamini-Hochberg method
B: B-statistics, log odds
wCLvsCLX: cell line group compared to matched secondary xenograft group
2_Differentially Expressed Genes: Probability > 0.88 and absolute FC > 2; wCLvsCLX
EGID	SYMBOL	GENENAME	ID	logFC	AveExpr	t	P.Value	adj.P.Val	B
23325	KIAA1033	KIAA1033	215936_s_at	1.34	6.71	7.44	0	0	9.05
3157	HMGCS1	3-hydroxy-3-methylglutaryl-Coenzyme A synthase 1 (soluble)	205822_s_at	2.27	8.7	6.73	0	0	7.28
8239	USP9X	ubiquitin specific peptidase 9, X-linked	230543_at	1.69	5.67	6.41	0	0	6.49
57082	CASC5	cancer susceptibility candidate 5	1552680_a_at	2.2	6.17	6.27	0	0	6.12
1004	CDH6	cadherin 6, type 2, K-cadherin (fetal kidney)	210602_s_at	3.04	4.04	6.23	0	0	6.01
25831	HECTD1	HECT domain containing 1	241683_at	1.28	4.96	6.19	0	0	5.91
83667	SESN2	sestrin 2	223195_s_at	1.77	6.78	6.06	0	0	5.59
8573	CASK	calcium/calmodulin-dependent serine protein kinase (MAGUK family)	238699_s_at	1.36	6.45	5.98	0	0	5.36
2491	CENPI	centromere protein I	207590_s_at	1.33	6.63	5.95	0	0	5.3
2710	GK	glycerol kinase	215977_x_at	1.3	6.51	5.84	0	0	5
50807	DDEF1	development and differentiation enhancing factor 1	236533_at	1.53	5.63	5.78	0	0	4.84
2035	EPB41	erythrocyte membrane protein band 4.1 (elliptocytosis 1, RH-linked)	1554481_a_at	1.32	6.79	5.7	0	0	4.63
29005	PRO1073	PRO1073 protein	227510_x_at	2.83	7.68	5.67	0	0	4.56
2181	ACSL3	acyl-CoA synthetase long-chain family member 3	201661_s_at	1.34	8.1	5.62	0	0.01	4.42
5286	PIK3C2A	phosphoinositide-3-kinase, class 2, alpha polypeptide	1553694_a_at	1.1	7.68	5.61	0	0.01	4.42
25939	SAMHD1	SAM domain and HD domain 1	1559883_s_at	1.57	5.88	5.58	0	0.01	4.32
57590	WDFY1	WD repeat and FYVE domain containing 1	233559_s_at	1.06	6.8	5.57	0	0.01	4.31
6789	STK4	serine/threonine kinase 4	205411_at	1.19	4.29	5.45	0	0.01	3.99
1660	DHX9	DEAH (Asp-Glu-Ala-His) box polypeptide 9	212107_s_at	1.65	9.35	5.29	0	0.01	3.57
79723	SUV39H2	suppressor of variegation 3-9 homolog 2 (Drosophila)	219262_at	1.72	4.22	5.21	0	0.01	3.35
114882	OSBPL8	oxysterol binding protein-like 8	228986_at	1.95	6.48	5.19	0	0.01	3.3
79094	CHAC1	ChaC, cation transport regulator homolog 1 (E. coli)	219270_at	1.46	5.97	5.12	0	0.01	3.13
4170	MCL1	myeloid cell leukemia sequence 1 (BCL2-related)	200796_s_at	1.79	6.43	5.12	0	0.01	3.12
340591	CA5BL	carbonic anhydrase VB-like	238435_at	1.49	5.41	5.12	0	0.01	3.11
833	CARS	cysteinyl-tRNA synthetase	240983_s_at	1.31	7.16	5.11	0	0.01	3.1
27125	AFF4	AF4/FMR2 family, member 4	243487_at	1.11	4.99	5.11	0	0.01	3.1
55055	ZWILCH	Zwilch, kinetochore associated, homolog (Drosophila)	218349_s_at	1.18	8.56	5.1	0	0.01	3.06
6474	SHOX2	short stature homeobox 2	210134_x_at	1.33	4.8	5.09	0	0.01	3.03
79659	DYNC2H1	dynein, cytoplasmic 2, heavy chain 1	1561939_at	1.89	3.94	5.08	0	0.01	3.02
7175	TPR	translocated promoter region (to activated MET oncogene)	1557227_s_at	1.97	7.01	5.08	0	0.01	3.01
2892	GRIA3	glutamate receptor, ionotrophic, AMPA 3	206730_at	1.06	2.72	5.08	0	0.01	3
81847	RNF146	ring finger protein 146	221430_s_at	1.28	6.58	5.08	0	0.01	3
255928	SYT14	synaptotagmin XIV	1553654_at	1.72	5.95	5.03	0	0.01	2.89
4800	NFYA	nuclear transcription factor Y, alpha	215720_s_at	1.21	6.42	4.96	0	0.01	2.7
259266	ASPM	asp (abnormal spindle) homolog, microcephaly associated (Drosophila)	232238_at	1.72	6.57	4.94	0	0.01	2.64
2713	GK3P	glycerol kinase 3 pseudogene	215966_x_at	1.1	5.45	4.91	0	0.01	2.56
122809	SOCS4	suppressor of cytokine signaling 4	1552792_at	1.51	5.96	4.87	0	0.02	2.47
4238	MFAP3	microfibrillar-associated protein 3	1552312_a_at	1.43	6.9	4.87	0	0.02	2.46
552889	LOC552889	hypothetical LOC552889	212113_at	1.65	8.02	4.85	0	0.02	2.42
23657	SLC7A11	solute carrier family 7, (cationic amino acid transporter, y+ system) member 11	207528_s_at	1.47	4.42	4.85	0	0.02	2.4
54989	ZNF770	zinc finger protein 770	238687_x_at	1.05	4.47	4.83	0	0.02	2.35
6506	SLC1A2	solute carrier family 1 (glial high affinity glutamate transporter), member 2	1558009_at	1.66	3.21	4.81	0	0.02	2.31
5774	PTPN3	protein tyrosine phosphatase, non-receptor type 3	203997_at	1.27	7.12	4.81	0	0.02	2.29
9728	KIAA0256	KIAA0256 gene product	212451_at	1.6	6.32	4.79	0	0.02	2.24
481	ATP1B1	ATPase, Na+/K+ transporting, beta 1 polypeptide	201242_s_at	2.82	9.78	4.78	0	0.02	2.21
6249	CLIP1	CAP-GLY domain containing linker protein 1	1558924_s_at	1.51	5.19	4.76	0	0.02	2.18
3308	HSPA4	heat shock 70kDa protein 4	208814_at	1.79	6.71	4.76	0	0.02	2.18
80267	EDEM3	ER degradation enhancer, mannosidase alpha-like 3	220342_x_at	1.34	7.14	4.75	0	0.02	2.14
79699	ZYG11B	zyg-11 homolog B (C. elegans)	227918_s_at	2.07	6.51	4.74	0	0.02	2.13
55752	2008-09-11	septin 11	201308_s_at	1.56	6.76	4.74	0	0.02	2.12
57551	TAOK1	TAO kinase 1	227454_at	1.86	7.35	4.74	0	0.02	2.11
10432	RBM14	RNA binding motif protein 14	1555639_a_at	1.31	7.11	4.73	0	0.02	2.08
9117	SEC22C	SEC22 vesicle trafficking protein homolog C (S. cerevisiae)	236268_at	1.32	6.63	4.72	0	0.02	2.07
162494	RHBDL3	rhomboid, veinlet-like 3 (Drosophila)	233409_at	-1.79	6.07	-4.73	0	0.02	2.09
6048	RNF5	ring finger protein 5	216018_at	-1.15	4.79	-4.83	0	0.02	2.36
441054	LOC441054	hypothetical protein LOC441054	236915_at	-1.15	4.24	-4.85	0	0.02	2.42
254268	C1orf62	chromosome 1 open reading frame 62	1563834_a_at	-2.11	3.11	-4.87	0	0.02	2.46
23338	PHF15	PHD finger protein 15	212660_at	-1.78	6.67	-4.88	0	0.02	2.47
1281	COL3A1	collagen, type III, alpha 1 (Ehlers-Danlos syndrome type IV, autosomal dominant)	215076_s_at	-3.08	6.63	-4.9	0	0.01	2.55
8396	PIP4K2B	phosphatidylinositol-5-phosphate 4-kinase, type II, beta	1558599_at	-1.22	4.01	-4.94	0	0.01	2.64
64772	FLJ21865	endo-beta-N-acetylglucosaminidase	220349_s_at	-1.05	6.3	-5.22	0	0.01	3.38
509	ATP5C1	ATP synthase, H+ transporting, mitochondrial F1 complex, gamma polypeptide 1	214132_at	-1.03	6.11	-5.36	0	0.01	3.75
84253	GARNL3	GTPase activating Rap/RanGAP domain-like 3	223604_at	-1.49	6.1	-5.38	0	0.01	3.81
91368	CDKN2AIPNL	CDKN2A interacting protein N-terminal like	1554348_s_at	-1.26	5.07	-5.66	0	0	4.52
3039	HBA1	hemoglobin, alpha 1	214414_x_at	-1.48	5.37	-5.84	0	0	5
4666	NACA	nascent polypeptide-associated complex alpha subunit	222018_at	-1.34	7.12	-6.2	0	0	5.95
7110	TMF1	TATA element modulatory factor 1	215855_s_at	-1.09	5.19	-6.23	0	0	6.01
1337	COX6A1	cytochrome c oxidase subunit VIa polypeptide 1	224344_at	-3.86	5.54	-10.13	0	0	15.03
3956	LGALS1	lectin, galactoside-binding, soluble, 1 (galectin 1)	216405_at	-5.57	6.79	-13.86	0	0	21.43
	NA	NA	217572_at	-6.89	8.27	-14.02	0	0	21.66
3046	HBE1	hemoglobin, epsilon 1	217683_at	-8.54	7.92	-17.71	0	0	26.18

## Sheet: supplTABLE C
SUPPLEMENTARY TABLE C
EGID: Entrez Gene Identifier
SYMBOL: Gene Symbol
GENE NAME: Official Gene Name
ID: Affymetrix Probe Set
logFC: logarithmic transformation (base 2) of the fold-change between groups
AveExpr: logarithmic (base2) average expression for the group
t: moderated t-statistics
P.value: unadjusted P value
adj.P.Val: adjusted P value with the Benjamini-Hochberg method
B: B-statistics, log odds
wXGvsCLX: primary xenograft group compared to matched secondary xenograft group
3_Differentially Expressed Genes: Probability > 0.88 and absolute FC > 2; wXGvsCLX
EGID	SYMBOL	GENENAME	ID	logFC	AveExpr	t	P.Value	adj.P.Val	B
492	ATP2B3	ATPase, Ca++ transporting, plasma membrane 3	207026_s_at	2.13	3.92	10.3	0	0	15.82
84701	COX4I2	cytochrome c oxidase subunit IV isoform 2 (lung)	232761_at	2.88	5.04	9.44	0	0	13.97
283143	LOC283143	hypothetical protein LOC283143	239675_at	1.32	3.12	8.29	0	0	11.34
414	ARSD	arylsulfatase D	232423_at	2.05	4.39	8.22	0	0	11.16
2261	FGFR3	fibroblast growth factor receptor 3 (achondroplasia, thanatophoric dwarfism)	204379_s_at	5.25	4.69	8.15	0	0	10.99
10417	SPON2	spondin 2, extracellular matrix protein	218638_s_at	1.5	4.7	8.11	0	0	10.9
	NA	NA	1556749_at	1.21	2.95	8.08	0	0	10.82
4438	MSH4	mutS homolog 4 (E. coli)	210533_at	1.48	2.97	7.98	0	0	10.6
11211	FZD10	frizzled homolog 10 (Drosophila)	219764_at	2.53	3.5	7.67	0	0	9.84
8239	USP9X	ubiquitin specific peptidase 9, X-linked	201100_s_at	1.14	10.35	7.62	0	0	9.7
169611	OLFML2A	olfactomedin-like 2A	213075_at	2.36	4.87	6.89	0	0	7.86
1028	CDKN1C	cyclin-dependent kinase inhibitor 1C (p57, Kip2)	213183_s_at	2.68	4.49	6.78	0	0	7.58
57142	RTN4	reticulon 4	1556049_at	1.87	6.07	6.77	0	0	7.54
23177	CEP68	centrosomal protein 68kDa	212677_s_at	1.83	7.24	6.54	0	0	6.93
283131	TncRNA	trophoblast-derived noncoding RNA	234989_at	4.39	5.99	6.43	0	0	6.65
9378	NRXN1	neurexin 1	237535_x_at	1.39	4.94	6.38	0	0	6.53
1299	COL9A3	collagen, type IX, alpha 3	204724_s_at	3.83	4.52	6.36	0	0	6.46
79364	ZXDC	ZXD family zinc finger C	230106_at	1.3	6.29	6.35	0	0	6.44
4986	OPRK1	opioid receptor, kappa 1	207553_at	2.5	4.2	6.34	0	0	6.41
64856	VWA1	von Willebrand factor A domain containing 1	218731_s_at	1.52	5.42	6.28	0	0	6.27
26576	SRPK3	SFRS protein kinase 3	206216_at	2.22	5.53	6.27	0	0	6.22
1471	CST3	cystatin C (amyloid angiopathy and cerebral hemorrhage)	201360_at	1.87	9.07	6.24	0	0	6.16
331	XIAP	X-linked inhibitor of apoptosis	225858_s_at	1.33	8.35	6.21	0	0	6.06
8228	PNPLA4	patatin-like phospholipase domain containing 4	209739_s_at	2.95	4.69	6.18	0	0	6
7767	ZNF224	zinc finger protein 224	216983_s_at	1.56	6.43	6.18	0	0	5.99
3911	LAMA5	laminin, alpha 5	210150_s_at	1.82	6.51	6.07	0	0	5.71
9282	MED14	mediator complex subunit 14	1569449_a_at	1.06	4.06	6.07	0	0	5.71
8573	CASK	calcium/calmodulin-dependent serine protein kinase (MAGUK family)	238699_s_at	1.3	6.45	6.06	0	0	5.68
51071	DERA	2-deoxyribose-5-phosphate aldolase homolog (C. elegans)	230892_at	1.87	5.92	5.98	0	0	5.47
4012	LNPEP	leucyl/cystinyl aminopeptidase	231866_at	2.32	6.65	5.98	0	0	5.46
139716	GAB3	GRB2-associated binding protein 3	228410_at	2.43	5.06	5.95	0	0	5.38
84901	NFATC2IP	nuclear factor of activated T-cells, cytoplasmic, calcineurin-dependent 2 interacting protein	212808_at	1.41	6.88	5.95	0	0	5.38
55466	DNAJA4	DnaJ (Hsp40) homolog, subfamily A, member 4	225061_at	3.74	5.21	5.91	0	0	5.27
9500	MAGED1	melanoma antigen family D, 1	244878_at	2.01	5.08	5.89	0	0	5.23
11064	CEP110	centrosomal protein 110kDa	242916_at	1.88	5.4	5.89	0	0	5.21
7627	ZNF75A	zinc finger protein 75a	227670_at	1.69	7.68	5.86	0	0	5.14
283846	DKFZp547E087	hypothetical gene LOC283846	235060_at	1.35	8.95	5.85	0	0	5.12
2820	GPD2	glycerol-3-phosphate dehydrogenase 2 (mitochondrial)	243598_at	1.75	3.51	5.82	0	0	5.04
83999	KREMEN1	kringle containing transmembrane protein 1	235370_at	1.19	5.11	5.81	0	0	5
23353	UNC84A	unc-84 homolog A (C. elegans)	206487_at	1.48	6.19	5.78	0	0	4.93
8502	PKP4	plakophilin 4	236752_at	1.67	7.95	5.78	0	0	4.93
84171	LOXL4	lysyl oxidase-like 4	227145_at	1.29	4.88	5.77	0	0	4.89
54361	WNT4	wingless-type MMTV integration site family, member 4	208606_s_at	2.41	3.87	5.74	0	0	4.83
23380	SRGAP2	SLIT-ROBO Rho GTPase activating protein 2	1556203_a_at	1.62	5.18	5.74	0	0	4.81
83541	FAM110A	family with sequence similarity 110, member A	226584_s_at	2.52	6.25	5.72	0	0	4.77
57007	CXCR7	chemokine (C-X-C motif) receptor 7	232746_at	2.64	3.29	5.7	0	0	4.71
7153	TOP2A	topoisomerase (DNA) II alpha 170kDa	237469_at	1.45	5.43	5.7	0	0	4.7
23049	SMG1	PI-3-kinase-related kinase SMG-1	210057_at	1.65	4.7	5.68	0	0	4.66
5128	PCTK2	PCTAIRE protein kinase 2	243993_at	1.97	6.18	5.67	0	0	4.63
132946	ARL9	ADP-ribosylation factor-like 9	229062_at	2.08	4.94	5.63	0	0	4.54
6249	CLIP1	CAP-GLY domain containing linker protein 1	1558924_s_at	1.67	5.19	5.61	0	0	4.48
56961	SHD	Src homology 2 domain containing transforming protein D	227845_s_at	2.43	4.43	5.6	0	0	4.45
25836	NIPBL	Nipped-B homolog (Drosophila)	242352_at	1.66	7.47	5.59	0	0	4.41
83666	PARP9	poly (ADP-ribose) polymerase family, member 9	223220_s_at	2.04	4.77	5.57	0	0	4.36
5422	POLA1	polymerase (DNA directed), alpha 1	1557809_a_at	1.76	6.4	5.5	0	0	4.18
140901	STK35	serine/threonine kinase 35	1562505_at	1.75	5.15	5.48	0	0	4.13
80325	ABTB1	ankyrin repeat and BTB (POZ) domain containing 1	226442_at	1.55	4.35	5.47	0	0	4.1
3897	L1CAM	L1 cell adhesion molecule	204584_at	3.1	6.63	5.41	0	0	3.93
221037	JMJD1C	jumonji domain containing 1C	224933_s_at	1.01	7.56	5.39	0	0	3.88
54901	CDKAL1	CDK5 regulatory subunit associated protein 1-like 1	1561025_at	1.95	3.42	5.34	0	0	3.76
6640	SNTA1	syntrophin, alpha 1 (dystrophin-associated protein A1, 59kDa, acidic component)	203516_at	1.27	6.52	5.33	0	0	3.71
116151	C20orf108	chromosome 20 open reading frame 108	224693_at	1.75	7.13	5.29	0	0	3.62
643562	LOC643562	similar to Rho GTPase activating protein 21	241701_at	1.18	5.56	5.24	0	0	3.48
399491	LOC399491	LOC399491 protein	214682_at	1.2	6.06	5.24	0	0	3.48
10984	KCNQ1OT1	KCNQ1 overlapping transcript 1 (non-protein coding)	243435_at	1.26	5.27	5.21	0	0	3.39
2181	ACSL3	acyl-CoA synthetase long-chain family member 3	236168_at	1.24	6.26	5.21	0	0	3.38
23654	PLXNB2	plexin B2	208890_s_at	2.09	7.55	5.2	0	0	3.38
57496	MKL2	MKL/myocardin-like 2	1562497_at	1.97	5.67	5.2	0	0	3.37
4661	MYT1	myelin transcription factor 1	210341_at	1.99	6.45	5.19	0	0	3.34
7403	UTX	ubiquitously transcribed tetratricopeptide repeat, X chromosome	203990_s_at	1.12	6.11	5.19	0	0	3.33
5922	RASA2	RAS p21 protein activator 2	230669_at	1.44	7.65	5.18	0	0	3.32
50649	ARHGEF4	Rho guanine nucleotide exchange factor (GEF) 4	205109_s_at	2.02	4.64	5.17	0	0	3.3
2491	CENPI	centromere protein I	207590_s_at	1.09	6.63	5.17	0	0	3.29
10521	DDX17	DEAD (Asp-Glu-Ala-Asp) box polypeptide 17	213998_s_at	2.17	7.62	5.17	0	0	3.29
7046	TGFBR1	transforming growth factor, beta receptor I (activin A receptor type II-like kinase, 53kDa)	239605_x_at	1.25	3.77	5.16	0	0	3.25
10013	HDAC6	histone deacetylase 6	206846_s_at	1.25	7.94	5.15	0	0	3.23
440345	LOC440345	hypothetical protein LOC440345	231989_s_at	1.07	8.51	5.14	0	0	3.21
150368	FAM109B	family with sequence similarity 109, member B	226504_at	1.6	4.84	5.14	0	0	3.2
25878	MXRA5	matrix-remodelling associated 5	209596_at	3.35	3.92	5.11	0	0	3.14
55733	HHAT	hedgehog acyltransferase	1556982_at	1.12	5.48	5.11	0	0	3.14
124602	KIF19	kinesin family member 19	1553314_a_at	2.11	4.37	5.1	0	0	3.11
6574	SLC20A1	solute carrier family 20 (phosphate transporter), member 1	230494_at	1.69	7.9	5.09	0	0	3.06
2332	FMR1	fragile X mental retardation 1	203689_s_at	1.03	9.04	5.08	0	0	3.05
7204	TRIO	triple functional domain (PTPRF interacting)	231403_at	1.57	6.2	5.08	0	0	3.04
57478	USP31	ubiquitin specific peptidase 31	226035_at	2.54	7.91	5.06	0	0	3
11264	PXMP4	peroxisomal membrane protein 4, 24kDa	224210_s_at	1.91	5.74	5.06	0	0	3
56243	KIAA1217	KIAA1217	231807_at	1.63	4.03	5.05	0	0	2.97
23362	PSD3	pleckstrin and Sec7 domain containing 3	203354_s_at	1.85	6.58	5.05	0	0	2.96
253959	GARNL1	GTPase activating Rap/RanGAP domain-like 1	215162_at	1.14	4.55	5.04	0	0	2.93
23332	CLASP1	cytoplasmic linker associated protein 1	240939_x_at	1.42	4.33	5.04	0	0	2.93
94235	GNG8	guanine nucleotide binding protein (G protein), gamma 8	234284_at	4.9	4.78	5.04	0	0	2.93
23523	CABIN1	calcineurin binding protein 1	1557580_at	1.01	5.08	5.03	0	0	2.92
23325	KIAA1033	KIAA1033	212794_s_at	1.06	7.62	5.03	0	0.01	2.9
2521	FUS	fusion (involved in t(12;16) in malignant liposarcoma)	1565716_at	1.5	5.68	5.01	0	0.01	2.87
155382	VPS37D	vacuolar protein sorting 37 homolog D (S. cerevisiae)	235569_at	1.01	5.74	5.01	0	0.01	2.86
339488	TFAP2E	transcription factor AP-2 epsilon (activating enhancer binding protein 2 epsilon)	1555348_at	1.47	5.14	5.01	0	0.01	2.85
343637	RSPO4	R-spondin family, member 4	237423_at	1.23	3.53	4.97	0	0.01	2.74
84939	MUM1	melanoma associated antigen (mutated) 1	229033_s_at	1.46	6.8	4.96	0	0.01	2.72
4603	MYBL1	v-myb myeloblastosis viral oncogene homolog (avian)-like 1	213906_at	2.81	7.21	4.92	0	0.01	2.62
9738	CP110	CP110 protein	1569353_at	2.21	6.06	4.91	0	0.01	2.58
780	DDR1	discoidin domain receptor tyrosine kinase 1	207169_x_at	2.18	7.4	4.9	0	0.01	2.57
53905	DUOX1	dual oxidase 1	219597_s_at	1	4.29	4.89	0	0.01	2.52
146174	C16orf52	chromosome 16 open reading frame 52	233832_at	1.43	5.34	4.87	0	0.01	2.49
5170	PDPK1	3-phosphoinositide dependent protein kinase-1	204524_at	1.56	7.5	4.86	0	0.01	2.47
758	MPPED1	metallophosphoesterase domain containing 1	206436_at	1.26	5.24	4.86	0	0.01	2.46
7102	TSPAN7	tetraspanin 7	234245_at	1.3	5	4.85	0	0.01	2.43
28955	DEXI	dexamethasone-induced transcript	1558742_at	1.21	4.96	4.85	0	0.01	2.42
150684	COMMD1	copper metabolism (Murr1) domain containing 1	239833_at	1.21	4.5	4.83	0	0.01	2.37
219771	CCNY	cyclin Y	224651_at	1.56	7.8	4.83	0	0.01	2.37
25959	KANK2	KN motif and ankyrin repeat domains 2	218418_s_at	2.4	6.62	4.81	0	0.01	2.32
57718	KIAA1622	KIAA1622	233002_at	2.42	3.89	4.8	0	0.01	2.31
10882	C1QL1	complement component 1, q subcomponent-like 1	205575_at	2.5	5.83	4.8	0	0.01	2.28
255967	PAN3	PAN3 polyA specific ribonuclease subunit homolog (S. cerevisiae)	239393_at	1.85	5.32	4.79	0	0.01	2.26
23589	CARHSP1	calcium regulated heat stable protein 1, 24kDa	218384_at	1.7	9.11	4.78	0	0.01	2.25
89766	UMODL1	uromodulin-like 1	1553183_at	2.6	3.27	4.77	0	0.01	2.21
29066	ZC3H7A	zinc finger CCCH-type containing 7A	226897_s_at	1.33	8.01	4.77	0	0.01	2.21
55857	C20orf19	chromosome 20 open reading frame 19	240521_at	1.22	4.83	4.77	0	0.01	2.21
140710	C20orf117	chromosome 20 open reading frame 117	207711_at	1.35	6.21	4.77	0	0.01	2.2
5228	PGF	placental growth factor	209652_s_at	3.22	5.17	4.76	0	0.01	2.19
27031	NPHP3	nephronophthisis 3 (adolescent)	235432_at	1.8	4.93	4.76	0	0.01	2.19
55268	ECHDC2	enoyl Coenzyme A hydratase domain containing 2	235305_s_at	2	4.42	4.76	0	0.01	2.19
57153	SLC44A2	solute carrier family 44, member 2	224609_at	1.91	6.29	4.75	0	0.01	2.16
23637	RABGAP1	RAB GTPase activating protein 1	204028_s_at	1.06	8.43	4.75	0	0.01	2.16
10648	SCGB1D1	secretoglobin, family 1D, member 1	207910_at	2.05	2.94	4.74	0	0.01	2.13
57674	RNF213	ring finger protein 213	230000_at	1.3	5.23	4.74	0	0.01	2.13
10952	SEC61B	Sec61 beta subunit	244700_at	1.05	3.57	4.73	0	0.01	2.12
9468	PCYT1B	phosphate cytidylyltransferase 1, choline, beta	230085_at	2.3	7.2	4.73	0	0.01	2.11
440354	LOC440354	PI-3-kinase-related kinase SMG-1 pseudogene	244766_at	1.15	6.86	4.73	0	0.01	2.1
51108	METTL9	methyltransferase like 9	230395_at	1.41	6.18	4.73	0	0.01	2.1
4659	PPP1R12A	protein phosphatase 1, regulatory (inhibitor) subunit 12A	201602_s_at	1.58	6.93	4.72	0	0.01	2.08
89797	NAV2	neuron navigator 2	1556606_at	1.5	3.19	4.72	0	0.01	2.08
9737	GPRASP1	G protein-coupled receptor associated sorting protein 1	204793_at	2.12	6.01	4.72	0	0.01	2.07
54675	CRLS1	cardiolipin synthase 1	232198_at	1.14	6.58	4.72	0	0.01	2.07
3070	HELLS	helicase, lymphoid-specific	220085_at	1.1	7.9	4.71	0	0.01	2.06
80258	EFHC2	EF-hand domain (C-terminal) containing 2	220591_s_at	2.09	3.51	4.71	0	0.01	2.06
58508	MLL3	myeloid/lymphoid or mixed-lineage leukemia 3	222413_s_at	1.57	7.69	4.7	0	0.01	2.03
6729	SRP54	signal recognition particle 54kDa	1557505_a_at	1.51	5.51	4.7	0	0.01	2.02
51187	C15orf15	chromosome 15 open reading frame 15	222465_at	-1.1	10.41	-4.71	0	0.01	2.05
285521	COX18	COX18 cytochrome c oxidase assembly homolog (S. cerevisiae)	227442_at	-1.11	8.24	-4.72	0	0.01	2.09
728568	LOC728568	hypothetical LOC728568	226943_at	-1.1	8.29	-4.77	0	0.01	2.22
285830	RP3-377H14.5	hypothetical protein FLJ35429	222279_at	-1.22	6.48	-4.78	0	0.01	2.24
51642	MRPL48	mitochondrial ribosomal protein L48	218281_at	-1.13	8.87	-4.86	0	0.01	2.46
54951	COMMD8	COMM domain containing 8	218351_at	-1.4	8.83	-4.87	0	0.01	2.49
1737	DLAT	dihydrolipoamide S-acetyltransferase	213149_at	-1.23	8.09	-4.87	0	0.01	2.49
152559	PAQR3	progestin and adipoQ receptor family member III	213372_at	-1.4	7.98	-4.94	0	0.01	2.67
623	BDKRB1	bradykinin receptor B1	207510_at	-1.29	4.08	-4.97	0	0.01	2.75
79365	BHLHB3	basic helix-loop-helix domain containing, class B, 3	221530_s_at	-2.43	4.8	-4.98	0	0.01	2.78
84838	ZNF496	zinc finger protein 496	225349_at	-1.31	5.72	-5	0	0.01	2.84
339983	NAT8L	N-acetyltransferase 8-like	235316_at	-1.37	6.82	-5.02	0	0.01	2.89
89849	ATG16L2	ATG16 autophagy related 16-like 2 (S. cerevisiae)	225883_at	-1.02	5.95	-5.02	0	0.01	2.9
3709	ITPR2	inositol 1,4,5-triphosphate receptor, type 2	202661_at	-2.11	4.09	-5.05	0	0	2.98
55330	CNO	cappuccino homolog (mouse)	223431_at	-1.15	7.46	-5.12	0	0	3.15
10418	SPON1	spondin 1, extracellular matrix protein	213993_at	-2.5	3.34	-5.13	0	0	3.17
54726	OTUD4	OTU domain containing 4	220669_at	-1.41	4.45	-5.14	0	0	3.2
92345	NAF1	nuclear assembly factor 1 homolog (S. cerevisiae)	244828_x_at	-1.61	6.84	-5.14	0	0	3.21
2149	F2R	coagulation factor II (thrombin) receptor	1569642_at	-1.03	4.64	-5.2	0	0	3.37
4351	MPI	mannose phosphate isomerase	230524_at	-1.04	5.34	-5.22	0	0	3.42
29953	TRHDE	thyrotropin-releasing hormone degrading enzyme	219937_at	-2.64	4.33	-5.22	0	0	3.43
220323	OAF	OAF homolog (Drosophila)	225510_at	-1.18	5.83	-5.39	0	0	3.88
2046	EPHA8	EPH receptor A8	231796_at	-1.19	5.04	-5.43	0	0	3.99
57492	ARID1B	AT rich interactive domain 1B (SWI1-like)	1566989_at	-1.2	6.22	-5.46	0	0	4.08
81693	AMN	amnionless homolog (mouse)	1563792_at	-1.53	4.55	-5.49	0	0	4.15
51091	SEPSECS	Sep (O-phosphoserine) tRNA:Sec (selenocysteine) tRNA synthase	231730_at	-1.1	4.91	-5.54	0	0	4.3
25898	RCHY1	ring finger and CHY zinc finger domain containing 1	212749_s_at	-1.3	8.48	-5.55	0	0	4.31
54941	RNF125	ring finger protein 125	235199_at	-2.82	4.55	-5.56	0	0	4.33
10227	MFSD10	major facilitator superfamily domain containing 10	209215_at	-1.22	7.02	-5.56	0	0	4.35
2103	ESRRB	estrogen-related receptor beta	1556156_at	-1.8	3.45	-5.57	0	0	4.36
79101	JOSD3	Josephin domain containing 3	221580_s_at	-1.15	10.18	-5.58	0	0	4.38
729683	LOC729683	hypothetical protein LOC729683	236497_at	-1.12	6.52	-5.59	0	0	4.42
5481	PPID	peptidylprolyl isomerase D (cyclophilin D)	204185_x_at	-1.24	9.46	-5.67	0	0	4.62
283392	LOC283392	hypothetical protein LOC283392	1560697_at	-1.06	3.2	-5.69	0	0	4.68
658	BMPR1B	bone morphogenetic protein receptor, type IB	240331_at	-1.75	3.28	-6.36	0	0	6.47
284242	LOC284242	hypothetical protein LOC284242	1560250_s_at	-1.2	3.46	-6.5	0	0	6.85
81579	PLA2G12A	phospholipase A2, group XIIA	221027_s_at	-1.62	7.03	-7.15	0	0	8.51
84264	HAGHL	hydroxyacylglutathione hydrolase-like	223485_at	-1.46	6.58	-7.36	0	0	9.04
124093	CCDC78	coiled-coil domain containing 78	236745_at	-1.75	3.61	-7.41	0	0	9.19
23657	SLC7A11	solute carrier family 7, (cationic amino acid transporter, y+ system) member 11	209921_at	-2.75	6.91	-8.25	0	0	11.24

## Sheet: supplTABLE D
SUPPLEMENTARY TABLE D
Pval: unadjusted P value from the Wilcoxn rank-sum test
BH-Pval: adjusted P value with the Benjamini-Hochberg method
B: B-statistics, log odds
XG: primary xenograft group
CL: cell line group
CLX: secondary xenograft group
Analysis of Functional Annotation Gene Ontology results: XG versus CL
The first 50 GO catergories that were enriched (adjusted P-value less than 0.05) are reported for the comparison between XG and CL, along with the genes esponsible for the enrichment (B-statistics more than 1.1 corresponding to a probability of differential expression greater than 0.75).
GO2ALLPROBES for wXGvsCL: - Enriched Gene Sets - Bstat = 1.1 - Probability > 0.75
	IDs	Genes_UP_Regulated_in_wXGvsCL	Genes_DW_Regulated_in_wXGvsCL	Description	Pval	BH-Pval	Rank
	GO:0019538	ADAMTS2 ANUBL1 AP1G2 ASCC3L1 C17orf27 CDK3 CFLAR CSNK2A1 CTNNA1 CUL3 DKFZp761P0423 DNAJA4 DPH5 FBXO11 FBXW4 FGFR3 FNTB GSN HDAC6 HS3ST4 IMMP2L KLK12 LRRK2 MAP1LC3A MAP4K3 MAPK8 MARK3 MGAT5 MMP14 MTMR3 MXRA5 NACA NPEPL1 PAN3 PARP9 PCTK1 PCTK2 PDK2 PHKA2 PRKAR1A PRKCH PSMB2 PSMB9 PTEN RBBP6 SFRS5 SOCS1 SRPK3 STK24 STK35 TLN1 TNK2 TRIO TRIOBP TTLL5 TTN UBE1C UBE2E3 UBE2I ULK1 USP34 USP7 USP9X XPNPEP3	AARS ABCE1 ANAPC10 B3GALT1 BAG2 CACYBP CARS CASP3 CCT2 CCT8 CDC25A CUL5 DENR DUSP10 EGLN1 EIF4E EIF4G2 FBXO28 GFM2 GLRX2 GRPEL1 HERC4 HERPUD1 HIP2 HSPA4 HSPA8 HSPA9B HSPH1 KCNQ5 LARS LDLR MAGI1 MAP4 MARS MRPL1 MRPL13 MTMR2 MTMR6 MVK OGFOD1 PDP2 PPID PRKAA2 PRMT8 PSMA7 SARS SCYE1 SLA/LP SLC7A11 SMARCA5 SPCS3 TCP1 TIMM8B TM4SF4 TRAPPC4 TRHDE UBE2D1 UBE2D3 UBE2N UCHL5 USP38 USP46 USP49 VAMP4 VRK3 WA…	GO:0019538.BP.protein metabolic process	0	0	1
	GO:0051244	ACTN4 ARHGEF11 AXIN1 BCAR1 CCNF CCNG2 CDK3 CDKN1C CFLAR CNOT2 CRSP2 CUL3 DACH1 DIDO1 DKFZP686P18101 EED ELF4 EZH2 FLCN GLIS3 GSN HDAC6 HES1 IGFBP4 JMJD1A LAMA5 LDLRAP1 LGALS1 LRRFIP1 LZTS1 MKL2 MLLT10 MTCP1 NF1 NOTCH3 PCTK1 PCTK2 PDPN PGF PRKAR1A PTEN RFX2 RORA SOCS1 SP3 STAT3 STAT5A SUZ12 TBC1D8 TCEA1 TFAP2E THRAP2 TIMP3 TMF1 TNK2 TOB1 TRIOBP TRIP6 UBE2E3 ZBTB5 ZNF500	AFF4 ANAPC10 API5 ATF3 CASP3 CBX3 CCNA2 CCND2 CCT2 CDC25A CDC73 CUL5 CXCL5 DHCR24 EIF4E EIF4G2 ERCC8 ESRRB GLRX2 GTF2H1 HIP2 HNRPD HSPA9B KLF12 MAD2L1 MAP4 PBX1 PDCD5 PHF23 POLR3K PRDM8 RORB SESN2 SLA/LP SMARCA5 SOCS2 TERF2 TM4SF4 TSC22D1 UBE2N VEGFC WARS ZNF197 ZNF451	GO:0051244	0	0	1
	GO:0009987	ABCA2 ABCC8 ACACB ACTN4 ADAMTS2 AFTPH ALDH1A3 ANKH ANUBL1 AP1G2 AP3B1 ARHGEF11 ARHGEF12 ARHGEF4 ARL4A ARL9 ARRB1 AS3MT ASCC3L1 ATP2B3 ATP5C1 AXIN1 BCAR1 C17orf27 C9orf39 CABIN1 CCNF CCNG2 CDH22 CDK3 CDKN1C CDS2 CEP250 CFLAR CHRNB4 CMKOR1 CNOT2 COL13A1 COL5A1 COL9A3 COX4I2 COX6A1 CRSP2 CSNK2A1 CTNNA1 CUL3 CXCR4 CYP2D6 DAAM1 DACH1 DDB2 DIDO1 DKFZP686P18101 DKFZp761P0423 DNAJA4 DPH5 DUOX1 DUOX2 EED …	AARS AASDHPPT ABCC5 ABCE1 ACSL3 AFF4 ANAPC10 API5 ARF4 ASAH1 ASNS ATF3 ATP11B ATP6V0A2 B3GALT1 BAG2 CACNA1I CACYBP CARS CASP3 CBX3 CCNA2 CCND2 CCRN4L CCT2 CCT8 CDC25A CDC73 CDH6 CHML CLCN3 CNIH4 CTH CUL5 CXCL5 CYP51A1 CYSLTR2 DDAH1 DENR DHCR24 DHCR7 DLAT DTNBP1 DUSP10 DYNC2H1 EIF4E EIF4G2 ELMOD2 ERCC8 ESRRB ETFDH ETNK1 EXO1 FBXO28 FDFT1 FDPS FDX1 FLAD1 FLJ20186 FXC1 GART GFM2 GLRX2 GPR125 GRPEL1 …	GO:0009987.BP.cellular process	0	0	1
	GO:0044464	ABCA2 ABCC8 ACTN4 AFTPH ANKH AP1G2 AP3B1 ARHGEF11 ARHGEF12 ARHGEF4 ARL4A ARMCX4 ARRB1 ARSD AS3MT ASCC3L1 ATN1 ATP2B3 ATP5C1 AXIN1 BCAR1 C20orf108 C9orf39 CABIN1 CALCOCO2 CALU CCNF CDH22 CDKN1C CDS2 CEP110 CEP250 CHRNB4 CMKOR1 CMTM4 CNOT2 COL13A1 COL5A1 COL9A3 COX4I2 COX6A1 CRSP2 CSRP1 CTDSP1 CTDSP2 CTNNA1 CUL3 CXCR4 CYP2D6 DACH1 DDB2 DIDO1 DIP DKFZP686P18101 DUOX1 DUOX2 EED EIF4ENIF1 ELF4 EML4 EZ…	AARS ABCC5 ABCE1 ACAT2 ACSL3 AFF4 ANAPC10 API5 ARF4 ASAH1 ASNS ATF3 ATP11B ATP6V0A2 B3GALT1 CACNA1I CACYBP CARS CBX3 CCNA2 CCND2 CCRN4L CCT2 CCT8 CDC25A CDC73 CDH6 CES2 CLCN3 CNIH4 CYP51A1 CYSLTR2 DHCR24 DHCR7 DLAT DTNBP1 DUSP10 DYNC2H1 EGLN1 EIF4E EIF4G2 ELMOD2 ELOVL5 ERCC8 ESRRB ETFDH ETNK1 EXO1 FDFT1 FDX1 FGF12 FXC1 GALNT10 GART GFM2 GLRX2 GPIAP1 GPR125 GRPEL1 GRSF1 GTF2H1 HERC4 HERPUD1 HIP2 H…	GO:0044464.CC.cell part	0	0	1
	GO:0031974	CRSP2 ELF4 GTF3C1 HDAC6 XPO1	DLAT ERCC8 FXC1 GRPEL1 GTF2H1 MRPL13 POLR2B POLR3K SMARCA5 TIMM8B	GO:0031974.CC.membrane-enclosed lumen	0	0	1
	GO:0044424	ABCA2 ACTN4 AFTPH AP1G2 AP3B1 ARL4A ARRB1 ARSD AS3MT ASCC3L1 ATN1 ATP5C1 AXIN1 BCAR1 CABIN1 CALCOCO2 CALU CCNF CDKN1C CDS2 CEP110 CEP250 CNOT2 COL13A1 COL5A1 COL9A3 COX4I2 COX6A1 CRSP2 CSRP1 CTDSP1 CTDSP2 CTNNA1 CUL3 CYP2D6 DACH1 DDB2 DIDO1 DIP DKFZP686P18101 EED EIF4ENIF1 ELF4 EML4 EZH2 FARP2 FBXO11 FBXW4 FMN2 FNTB GARNL1 GFPT2 GLIS3 GPD2 GSN GSTA1 GTF3C1 GUSB HBE1 HDAC6 HES1 HHAT HNRPM ITPR3 JM…	AARS ABCE1 ACAT2 ACSL3 AFF4 ANAPC10 API5 ASAH1 ATF3 ATP11B CACYBP CARS CBX3 CCNA2 CCND2 CCRN4L CCT2 CCT8 CDC73 CES2 CLCN3 DHCR24 DHCR7 DLAT DTNBP1 DUSP10 DYNC2H1 EGLN1 EIF4E EIF4G2 ELMOD2 ERCC8 ESRRB ETFDH ETNK1 EXO1 FDFT1 FDX1 FGF12 FXC1 GART GFM2 GLRX2 GRPEL1 GRSF1 GTF2H1 HERPUD1 HIP2 HMGCR HMGCS1 HNRPD HNRPDL HSPA4 HSPA8 HSPA9B HSPH1 KLF12 KRTAP4-7 LARS LSM6 MAD2L1 MAP4 MARS MRPL1 MRPL13 MRPL4…	GO:0044424.CC.intracellular part	0	0	1
	GO:0044428	ASCC3L1 CRSP2 ELF4 GTF3C1 HDAC6 HNRPM TTN XPO1	ANAPC10 API5 ATP11B DHCR7 ERCC8 GTF2H1 HNRPDL LSM6 PLRG1 POLR2B POLR3K SMARCA5	GO:0044428.CC.nuclear part	0	0	1
	GO:0044444	ABCA2 ACTN4 AFTPH AP1G2 AP3B1 ARSD AS3MT ATP5C1 CALU CDS2 CEP110 CEP250 COX4I2 COX6A1 CYP2D6 DIP GPD2 GSN GUSB HBE1 HHAT ITPR3 KTN1 LAMP2 LDLRAP1 MAP1LC3A MGAT5 MON2 MTCP1 NACA NDUFB6 NDUFS1 PDK2 PDZD2 PIK4CA PSMB2 PSMB9 RAB22A TLN1 TTN TUBGCP6 VIL2 VISA XYLT1	ABCE1 ACSL3 ASAH1 CCT2 CCT8 CES2 CLCN3 DHCR24 DHCR7 DLAT DYNC2H1 EGLN1 EIF4E EIF4G2 ETFDH FDFT1 FDX1 FXC1 GFM2 GLRX2 GRPEL1 HERPUD1 HMGCR HSPA9B MRPL1 MRPL13 MRPL44 MTO1 MVK NEU1 PDP2 PIK3C2A PIK3R3 PPA2 PSMA7 RAB6A SC4MOL SCD SEC22B SGCB SLC39A1 SPCS3 STIP1 TCP1 TIMM17A TIMM8B TMED5 TOMM40L TRAPPC4 UCHL5 UGT8 VAMP4	GO:0044444.CC.cytoplasmic part	0	0	1
	GO:0044260	ADAMTS2 ANUBL1 C17orf27 CDK3 CFLAR CSNK2A1 CUL3 DKFZp761P0423 DNAJA4 DPH5 FBXO11 FBXW4 FGFR3 FNTB GSN HDAC6 HS3ST4 IMMP2L KLK12 LRRK2 MAP1LC3A MAP4K3 MAPK8 MARK3 MGAT5 MMP14 MTMR3 MXRA5 NACA NPEPL1 PAN3 PARP9 PCTK1 PCTK2 PDK2 PHKA2 PRKAR1A PRKCH PSMB2 PSMB9 PTEN RBBP6 SOCS1 SRPK3 STK24 STK35 TNK2 TRIO TRIOBP TTLL5 TTN UBE1C UBE2E3 UBE2I ULK1 USP34 USP7 USP9X XPNPEP3	AARS ABCE1 ANAPC10 B3GALT1 BAG2 CACYBP CARS CASP3 CCT2 CCT8 CDC25A CUL5 DENR DUSP10 EIF4E EIF4G2 FBXO28 GFM2 GLRX2 GRPEL1 HERC4 HERPUD1 HIP2 HSPA4 HSPA8 HSPA9B HSPH1 LARS LDLR MAP4 MARS MRPL1 MRPL13 MTMR2 MTMR6 MVK PDP2 PPID PRKAA2 PRMT8 PSMA7 SARS SCYE1 SLA/LP SPCS3 TCP1 TIMM8B TM4SF4 TRAPPC4 TRHDE UBE2D1 UBE2D3 UBE2N UCHL5 USP38 USP46 USP49 VRK3 WARS	GO:0044260.BP.cellular macromolecule metabolic process	0	0	1
	GO:0044267	ADAMTS2 ANUBL1 C17orf27 CDK3 CFLAR CSNK2A1 CUL3 DKFZp761P0423 DNAJA4 DPH5 FBXO11 FBXW4 FGFR3 FNTB GSN HDAC6 HS3ST4 IMMP2L KLK12 LRRK2 MAP1LC3A MAP4K3 MAPK8 MARK3 MGAT5 MMP14 MTMR3 MXRA5 NACA NPEPL1 PAN3 PARP9 PCTK1 PCTK2 PDK2 PHKA2 PRKAR1A PRKCH PSMB2 PSMB9 PTEN RBBP6 SOCS1 SRPK3 STK24 STK35 TNK2 TRIO TRIOBP TTLL5 TTN UBE1C UBE2E3 UBE2I ULK1 USP34 USP7 USP9X XPNPEP3	AARS ABCE1 ANAPC10 B3GALT1 BAG2 CACYBP CARS CASP3 CCT2 CCT8 CDC25A CUL5 DENR DUSP10 EIF4E EIF4G2 FBXO28 GFM2 GLRX2 GRPEL1 HERC4 HERPUD1 HIP2 HSPA4 HSPA8 HSPA9B HSPH1 LARS LDLR MAP4 MARS MRPL1 MRPL13 MTMR2 MTMR6 MVK PDP2 PPID PRKAA2 PRMT8 PSMA7 SARS SCYE1 SLA/LP SPCS3 TCP1 TIMM8B TM4SF4 TRAPPC4 TRHDE UBE2D1 UBE2D3 UBE2N UCHL5 USP38 USP46 USP49 VRK3 WARS	GO:0044267.BP.cellular protein metabolic process	0	0	1
	GO:0008152	ABCA2 ABCC8 ACACB ADAMTS2 ALDH1A3 ANUBL1 AP1G2 ARHGEF11 ARL4A ARSD AS3MT ASCC3L1 ATP2B3 ATP5C1 C17orf27 CDK3 CDS2 CFLAR CNOT2 COX4I2 COX6A1 CRSP2 CSNK2A1 CTNNA1 CUL3 CYP2D6 DACH1 DDB2 DIDO1 DIP DKFZP686P18101 DKFZp761P0423 DNAJA4 DPH5 DUOX1 DUOX2 ECHDC2 EED ELF4 EXOSC6 EZH2 FBXO11 FBXW4 FGFR3 FLJ21865 FLJ35220 FNTB GFPT2 GLIS3 GPD2 GSN GSTA1 GTF3C1 GUSB HDAC6 HES1 HEXDC HNRPM HS3ST4 IGFBP4 IMMP2L…	AARS AASDHPPT ABCE1 ACAT2 ACSL3 AFF4 ANAPC10 ARF4 ASAH1 ASNS ATF3 ATP11B B3GALT1 BAG2 CACYBP CARS CASP3 CBX3 CCRN4L CCT2 CCT8 CDC25A CDC73 CES2 CTH CUL5 CYP51A1 DDAH1 DENR DHCR24 DHCR7 DLAT DUSP10 EGLN1 EIF4E EIF4G2 ERCC8 ESRRB ETFDH ETNK1 EXO1 FBXO28 FDFT1 FDPS FDX1 FLAD1 GART GFM2 GLRX2 GRPEL1 GRSF1 GTF2H1 HERC4 HERPUD1 HIP2 HMGCR HMGCS1 HNRPD HNRPDL HSPA4 HSPA8 HSPA9B HSPH1 KCNQ5 KLF12 LARS LD…	GO:0008152.BP.metabolic process	0	0	1
	GO:0044237	ABCA2 ACACB ADAMTS2 ALDH1A3 ANUBL1 ARHGEF11 ARL4A AS3MT ASCC3L1 ATP5C1 C17orf27 CDK3 CDS2 CFLAR CNOT2 COX4I2 COX6A1 CRSP2 CSNK2A1 CUL3 CYP2D6 DACH1 DDB2 DIDO1 DKFZP686P18101 DKFZp761P0423 DNAJA4 DPH5 DUOX1 DUOX2 EED ELF4 EXOSC6 EZH2 FBXO11 FBXW4 FGFR3 FLJ35220 FNTB GFPT2 GLIS3 GPD2 GSN GSTA1 GTF3C1 GUSB HDAC6 HES1 HNRPM HS3ST4 IGFBP4 IMMP2L JMJD1A KIAA0251 KLK12 LDLRAP1 LRRFIP1 LRRK2 LZTS1 MAP1LC…	AARS AASDHPPT ABCE1 ACSL3 AFF4 ANAPC10 ARF4 ASAH1 ASNS ATF3 B3GALT1 BAG2 CACYBP CARS CASP3 CBX3 CCRN4L CCT2 CCT8 CDC25A CDC73 CTH CUL5 CYP51A1 DDAH1 DENR DHCR24 DHCR7 DLAT DUSP10 EIF4E EIF4G2 ERCC8 ESRRB ETFDH ETNK1 EXO1 FBXO28 FDFT1 FDPS FDX1 FLAD1 GART GFM2 GLRX2 GRPEL1 GRSF1 GTF2H1 HERC4 HERPUD1 HIP2 HMGCR HMGCS1 HNRPD HNRPDL HSPA4 HSPA8 HSPA9B HSPH1 KLF12 LARS LDLR LSM6 MAP4 MARS MPI MRPL1 MR…	GO:0044237.BP.cellular metabolic process	0	0	1
	GO:0044238	ABCA2 ABCC8 ACACB ADAMTS2 ALDH1A3 ANUBL1 AP1G2 ARHGEF11 ARL4A ASCC3L1 ATP5C1 C17orf27 CDK3 CDS2 CFLAR CNOT2 CRSP2 CSNK2A1 CTNNA1 CUL3 DACH1 DDB2 DIDO1 DKFZP686P18101 DKFZp761P0423 DNAJA4 DPH5 EED ELF4 EXOSC6 EZH2 FBXO11 FBXW4 FGFR3 FLJ21865 FLJ35220 FNTB GFPT2 GLIS3 GPD2 GSN GTF3C1 GUSB HDAC6 HES1 HEXDC HNRPM HS3ST4 IGFBP4 IMMP2L JMJD1A KLK12 LDLRAP1 LOC91316 LRRFIP1 LRRK2 LZTS1 MAP1LC3A MAP4K3 M…	AARS AASDHPPT ABCE1 ACAT2 ACSL3 AFF4 ANAPC10 ARF4 ASAH1 ASNS ATF3 B3GALT1 BAG2 CACYBP CARS CASP3 CBX3 CCRN4L CCT2 CCT8 CDC25A CDC73 CTH CUL5 CYP51A1 DDAH1 DENR DHCR24 DHCR7 DLAT DUSP10 EGLN1 EIF4E EIF4G2 ERCC8 ESRRB ETNK1 EXO1 FBXO28 FDFT1 FDPS FDX1 GART GFM2 GLRX2 GRPEL1 GRSF1 GTF2H1 HERC4 HERPUD1 HIP2 HMGCR HMGCS1 HNRPD HNRPDL HSPA4 HSPA8 HSPA9B HSPH1 KCNQ5 KLF12 LARS LDLR LSM6 MAGI1 MAP4 MARS …	GO:0044238.BP.primary metabolic process	0	0	1
	GO:0005488	ABCA2 ABCC8 ABTB1 ACACB ACTN4 ADAMTS2 AFTPH AMZ2 ANUBL1 AP1G2 AP3B1 ARHGEF11 ARHGEF12 ARL4A ARL9 ARSD ASCC3L1 ATN1 ATP2B3 ATP5C1 AXIN1 BCAR1 BTBD3 C17orf27 C20orf119 CABIN1 CALCOCO2 CALU CDH22 CDK3 CDKAL1 CDKN1C CEP250 CFLAR CHRNB4 CMTM4 COL5A1 CRSP2 CSNK2A1 CSRP1 CST3 CTNNA1 CUGBP2 CUL3 CXCR4 CYP2D6 DAAM1 DACH1 DDB2 DIDO1 DKFZP686P18101 DKFZp761P0423 DNAJA4 DUOX1 DUOX2 EFHC2 EIF4ENIF1 ELF4 EXOSC…	AARS AASDHPPT ABCC5 ABCE1 ACSL3 AFF4 ANAPC10 API5 ARF4 ATF3 ATP11B B3GALT1 BAG2 BDNF CACNA1I CARS CASP3 CBX3 CCNA2 CCND2 CCRN4L CCT2 CCT8 CDC73 CDH6 CHAC1 CLCN3 CUL5 CXCL5 CYP51A1 DDAH1 DENR DHCR24 DLAT DTNBP1 DYNC2H1 EGLN1 EIF4E EIF4G2 ENDOGL1 ERCC8 ESRRB ETFDH EXO1 FDFT1 FDX1 FGF12 FLJ20186 FXC1 GALNT10 GART GFM2 GLRX2 GPIAP1 GRPEL1 GRSF1 HIP2 HNRPD HNRPDL HSPA4 HSPA8 HSPA9B HSPH1 IFRD1 KCNK12 …	GO:0005488.MF.binding	0	0	1
	GO:0003824	ABCA2 ABCC8 ACACB ADAMTS2 ALDH1A3 AMZ2 ARL4A ARSD AS3MT ASCC3L1 ATP2B3 ATP5C1 C9orf39 CDK3 CDKAL1 CDS2 CFLAR COX4I2 COX6A1 CSNK2A1 CTDSP1 CTDSP2 CYP2D6 DIP DKFZp761P0423 DPH5 DUOX1 DUOX2 ECHDC2 EXOSC6 FAM113A FBXO11 FGFR3 FLJ21865 FLJ35220 FNTB GFPT2 GNAI2 GNAS GNG8 GPD2 GSTA1 GUSB HDAC6 HEXDC HHAT HS3ST4 IMMP2L JMJD1A KIAA0251 KLK12 LOC220686 LOC91316 LOXL4 LRRK2 MAP4K3 MAPK8 MARK3 MGAT5 MGLL MM…	AARS AASDHPPT ABCC5 ABCE1 ACAT2 ACSL3 ANAPC10 ARF4 ASAH1 ASNS ATP11B B3GALT1 CARS CASP3 CCT8 CDC25A CES2 CHML CTH CYP51A1 DDAH1 DHCR24 DHCR7 DLAT DUSP10 DYNC2H1 EGLN1 ENDOGL1 ETFDH ETNK1 EXO1 FDFT1 FDPS FDX1 FLAD1 GALNT10 GART GLRX2 GTF2H1 HAGHL HERC4 HIP2 HISPPD1 HMGCR HMGCS1 HSPA8 LARS MAGI1 MARS METT5D1 MPI MRPL44 MTMR2 MTMR6 MTO1 MVD MVK NEU1 OGFOD1 PAICS PDP2 PGD PGM2 PIK3C2A PIK3R3 PLA2G12A…	GO:0003824.MF.catalytic activity	0	0	1
	GO:0005737	ABCA2 ACTN4 AFTPH AP1G2 AP3B1 ARRB1 ARSD AS3MT ATN1 ATP5C1 AXIN1 BCAR1 CALCOCO2 CALU CDS2 CEP110 CEP250 COL13A1 COL5A1 COL9A3 COX4I2 COX6A1 CYP2D6 DIP EIF4ENIF1 EML4 FARP2 FNTB GFPT2 GPD2 GSN GSTA1 GUSB HBE1 HDAC6 HHAT ITPR3 KTN1 LAMP2 LDLRAP1 LGALS1 LRRFIP1 LZTS1 MAP1LC3A MGAT5 MON2 MTCP1 MTMR3 NACA NDUFB6 NDUFS1 NF1 NPEPL1 PCBP2 PDK2 PDZD2 PIK4CA PSMB2 PSMB9 PTEN RAB22A SOCS1 STAT3 TLN1 TNK2 TT…	AARS ABCE1 ACAT2 ACSL3 API5 ASAH1 CARS CCT2 CCT8 CES2 CLCN3 DHCR24 DHCR7 DLAT DTNBP1 DUSP10 DYNC2H1 EGLN1 EIF4E EIF4G2 ETFDH ETNK1 FDFT1 FDX1 FXC1 GART GFM2 GLRX2 GRPEL1 GRSF1 HERPUD1 HMGCR HMGCS1 HNRPD HSPA4 HSPA9B HSPH1 LARS MARS MRPL1 MRPL13 MRPL44 MTMR2 MTO1 MVK NEU1 PDP2 PIK3C2A PIK3R3 PPA2 PPP2R5A PSMA7 RAB6A RCHY1 SARS SC4MOL SCD SEC22B SGCB SLA/LP SLC39A1 SOCS2 SPCS3 STIP1 TAX1BP3 TCP1 TF…	GO:0005737.CC.cytoplasm	0	0	1
	GO:0005739	ATP5C1 CDS2 COX4I2 COX6A1 GPD2 MTCP1 NDUFB6 NDUFS1 PDK2 VISA	ABCE1 DLAT ETFDH FDX1 FXC1 GFM2 GLRX2 GRPEL1 HSPA9B MRPL1 MRPL13 MRPL44 MTO1 PDP2 PPA2 TIMM17A TIMM8B TOMM40L	GO:0005739.CC.mitochondrion	0	0	1
	GO:0003674	ABCA2 ABCC8 ABTB1 ACACB ACTN4 ADAMTS2 AFTPH ALDH1A3 AMMECR1 AMZ2 ANKH ANUBL1 AP1G2 AP3B1 ARHGEF11 ARHGEF12 ARHGEF4 ARL4A ARL9 ARRB1 ARSD AS3MT ASCC3L1 ATN1 ATP2B3 ATP5C1 AUTS2 AXIN1 BCAR1 BTBD3 C17orf27 C20orf119 C9orf39 CABIN1 CALCOCO2 CALU CDH22 CDK3 CDKAL1 CDKN1C CDS2 CEP110 CEP250 CFLAR CHRNB4 CMKOR1 CMTM4 CNOT2 COL5A1 COL9A3 COX4I2 COX6A1 CRSP2 CRYGS CSNK2A1 CSRP1 CST3 CTDSP1 CTDSP2 CTNNA1 C…	AARS AASDHPPT ABCC5 ABCE1 ACAT2 ACSL3 AFF4 ANAPC10 API5 ARF4 ASAH1 ASNS ATF3 ATP11B ATP6V0A2 B3GALT1 BAG2 BDNF BRP44L CACNA1I CARS CASP3 CBX3 CCNA2 CCND2 CCRN4L CCT2 CCT8 CDC25A CDC73 CDH6 CES2 CHAC1 CHML CLCN3 CTH CUL5 CXCL5 CYP51A1 CYSLTR2 DDAH1 DENR DHCR24 DHCR7 DLAT DTNBP1 DUSP10 DYNC2H1 EGLN1 EIF4E EIF4G2 ENDOGL1 ERCC8 ESRRB ETFDH ETNK1 EXO1 FDFT1 FDPS FDX1 FGF12 FLAD1 FLJ20186 FXC1 GALNT10 …	GO:0003674.MF.molecular_function	0	0	1
	GO:0003676	ASCC3L1 C20orf119 CUGBP2 DACH1 DDB2 EIF4ENIF1 ELF4 EXOSC6 EZH2 GLIS3 GTF3C1 HES1 HNRPM LRRFIP1 LZTS1 MBNL2 MKL2 MKRN1 MLLT10 MSH4 NACA PCBP2 POLA2 RABGEF1 RBBP6 RBM33 RBPMS RC3H1 RFX2 RG9MTD3 RORA SFRS5 SFRS7 SP3 STAT3 STAT5A SUZ12 TCEA1 TFAP2E TMF1 TOP1 TOP2A XPO1 ZBTB5 ZCCHC7 ZFAND6 ZNF500	AARS AFF4 ATF3 CARS CCRN4L DENR EIF4E EIF4G2 ENDOGL1 ESRRB EXO1 GFM2 GRSF1 HIP2 HNRPD HNRPDL KLF12 LSM6 MARS MRPL1 MRPL44 PBX1 POLR2B POLR3K PRDM8 PRR3 RORB SARS SCYE1 SLA/LP SMARCA5 TERF2 TSC22D1 ZNF197 ZNF451 ZNF770	GO:0003676.MF.nucleic acid binding	0	0	1
	GO:0000166	ABCA2 ABCC8 ACACB ARL4A ARL9 ASCC3L1 ATP2B3 C20orf119 CDK3 CSNK2A1 CUGBP2 DKFZp761P0423 DUOX1 DUOX2 FGFR3 GNAI2 GNAS HHAT HNRPM LOC146909 LRRK2 MAP4K3 MAPK8 MARK3 MSH4 MXRA5 MYO10 MYO1E MYO7A NAV2 NOS1 PAN3 PCTK1 PCTK2 PDK2 PRKAR1A PRKCH RAB22A RAB40C RBM33 RBPMS SFRS5 SFRS7 SMC5 SRPK3 STEAP3 STK24 STK35 TNK2 TNRC6B TOP2A TRIO TTLL5 TTN UBE1C ULK1	AARS ABCC5 ABCE1 ARF4 ATP11B CARS CCT2 CCT8 DYNC2H1 GART GFM2 GRPEL1 GRSF1 HNRPD HNRPDL HSPA4 HSPA8 HSPA9B HSPH1 LARS MAGI1 MARS MVD MVK PAICS PRKAA2 RAB6A RAB6C RAP2A SARS SMARCA5 TAX1BP3 TCP1 VRK3 WARS	GO:0000166.MF.nucleotide binding	0	0	1
	GO:0005524	ABCA2 ABCC8 ACACB ASCC3L1 ATP2B3 CDK3 CSNK2A1 DKFZp761P0423 FGFR3 LOC146909 LRRK2 MAP4K3 MAPK8 MARK3 MSH4 MXRA5 MYO10 MYO1E MYO7A PAN3 PCTK1 PCTK2 PDK2 PRKCH SMC5 SRPK3 STK24 STK35 TNK2 TOP2A TRIO TTLL5 TTN UBE1C ULK1	AARS ABCC5 ABCE1 ATP11B CARS CCT2 CCT8 DYNC2H1 GART HSPA4 HSPA8 HSPA9B HSPH1 LARS MAGI1 MARS MVD MVK PAICS PRKAA2 SARS SMARCA5 TAX1BP3 TCP1 VRK3 WARS	GO:0005524.MF.ATP binding	0	0	1
	GO:0005515	ABTB1 ACTN4 AFTPH AP1G2 ARHGEF11 ARHGEF12 ASCC3L1 ATN1 ATP2B3 AXIN1 BCAR1 BTBD3 C17orf27 CALCOCO2 CDH22 CDKN1C CEP250 CFLAR CMTM4 CRSP2 CSNK2A1 CST3 CTNNA1 CUL3 CXCR4 DAAM1 DACH1 DIDO1 DNAJA4 EIF4ENIF1 ELF4 FARP2 FGFR3 FMN2 GSN HDAC6 IGFBP4 KBTBD9 KCNS2 LAMA5 LDLRAP1 LOC339745 LRDD MAPK8 MARK3 MKL2 MKRN1 MLLT10 MMP14 MYO10 MYO1E MYO7A NINJ1 NOS1 NRXN1 NUDT14 PCBP2 PDZD2 PGF PHKA2 PIK4CA PKP4 PLCG…	ABCE1 ANAPC10 API5 ATF3 BAG2 BDNF CASP3 CBX3 CCNA2 CCND2 CCT2 CCT8 CDC73 CDH6 CHAC1 CLCN3 CUL5 CXCL5 DHCR24 DLAT DTNBP1 EIF4E EIF4G2 ERCC8 EXO1 FGF12 FLJ20186 GRPEL1 HSPA8 HSPA9B KLF12 KLHL18 LDLR LSM6 MAD2L1 MAGI1 MTMR2 MVK PAICS PBX1 PGD PHF23 PIK3C2A PIK3R3 PLRG1 PPID PPP2R5A PRMT8 RAB6A RAP1GDS1 RCHY1 RORB SCYE1 SEC22B SLA/LP SLC3A2 SMARCA5 SOCS2 SPRED1 TAX1BP3 TCP1 TERF2 TIMM8B TRAPPC4 UBE2D…	GO:0005515.MF.protein binding	0	0	1
	GO:0005622	ABCA2 ACTN4 AFTPH AP1G2 AP3B1 ARHGEF11 ARHGEF12 ARHGEF4 ARL4A ARRB1 ARSD AS3MT ASCC3L1 ATN1 ATP5C1 AXIN1 BCAR1 CABIN1 CALCOCO2 CALU CCNF CDKN1C CDS2 CEP110 CEP250 CNOT2 COL13A1 COL5A1 COL9A3 COX4I2 COX6A1 CRSP2 CSRP1 CTDSP1 CTDSP2 CTNNA1 CUL3 CYP2D6 DACH1 DDB2 DIDO1 DIP DKFZP686P18101 EED EIF4ENIF1 ELF4 EML4 EZH2 FARP2 FBXO11 FBXW4 FLJ21865 FMN2 FNTB GARNL1 GFPT2 GLIS3 GPD2 GSN GSTA1 GTF3C1 GUSB …	AARS ABCE1 ACAT2 ACSL3 AFF4 ANAPC10 API5 ARF4 ASAH1 ATF3 ATP11B CACYBP CARS CBX3 CCNA2 CCND2 CCRN4L CCT2 CCT8 CDC25A CDC73 CES2 CLCN3 DHCR24 DHCR7 DLAT DTNBP1 DUSP10 DYNC2H1 EGLN1 EIF4E EIF4G2 ELMOD2 ERCC8 ESRRB ETFDH ETNK1 EXO1 FDFT1 FDX1 FGF12 FXC1 GART GFM2 GLRX2 GRPEL1 GRSF1 GTF2H1 HERC4 HERPUD1 HIP2 HMGCR HMGCS1 HNRPD HNRPDL HSPA4 HSPA8 HSPA9B HSPH1 KLF12 KRTAP4-7 LARS LSM6 MAD2L1 MAP4 MARS …	GO:0005622.CC.intracellular	0	0	1
	GO:0005623	ABCA2 ABCC8 ACTN4 AFTPH ANKH AP1G2 AP3B1 ARHGEF11 ARHGEF12 ARHGEF4 ARL4A ARMCX4 ARRB1 ARSD AS3MT ASCC3L1 ATN1 ATP2B3 ATP5C1 AXIN1 BCAR1 C20orf108 C9orf39 CABIN1 CALCOCO2 CALU CCNF CDH22 CDKN1C CDS2 CEP110 CEP250 CHRNB4 CMKOR1 CMTM4 CNOT2 COL13A1 COL5A1 COL9A3 COX4I2 COX6A1 CRSP2 CSRP1 CTDSP1 CTDSP2 CTNNA1 CUL3 CXCR4 CYP2D6 DACH1 DDB2 DIDO1 DIP DKFZP686P18101 DUOX1 DUOX2 EED EIF4ENIF1 ELF4 EML4 EZ…	AARS ABCC5 ABCE1 ACAT2 ACSL3 AFF4 ANAPC10 API5 ARF4 ASAH1 ASNS ATF3 ATP11B ATP6V0A2 B3GALT1 CACNA1I CACYBP CARS CBX3 CCNA2 CCND2 CCRN4L CCT2 CCT8 CDC25A CDC73 CDH6 CES2 CLCN3 CNIH4 CYP51A1 CYSLTR2 DHCR24 DHCR7 DLAT DTNBP1 DUSP10 DYNC2H1 EGLN1 EIF4E EIF4G2 ELMOD2 ELOVL5 ERCC8 ESRRB ETFDH ETNK1 EXO1 FDFT1 FDX1 FGF12 FXC1 GALNT10 GART GFM2 GLRX2 GPIAP1 GPR125 GRPEL1 GRSF1 GTF2H1 HERC4 HERPUD1 HIP2 H…	GO:0005623.CC.cell	0	0	1
	GO:0017076	ABCA2 ABCC8 ACACB ARL4A ARL9 ASCC3L1 ATP2B3 CDK3 CSNK2A1 DKFZp761P0423 DUOX1 DUOX2 FGFR3 GNAI2 GNAS HHAT LOC146909 LRRK2 MAP4K3 MAPK8 MARK3 MSH4 MXRA5 MYO10 MYO1E MYO7A NOS1 PAN3 PCTK1 PCTK2 PDK2 PRKAR1A PRKCH RAB22A RAB40C SMC5 SRPK3 STEAP3 STK24 STK35 TNK2 TOP2A TRIO TTLL5 TTN UBE1C ULK1	AARS ABCC5 ABCE1 ARF4 ATP11B CARS CCT2 CCT8 DYNC2H1 GART GFM2 GRPEL1 HSPA4 HSPA8 HSPA9B HSPH1 LARS MAGI1 MARS MVD MVK PAICS PRKAA2 RAB6A RAB6C RAP2A SARS SMARCA5 TAX1BP3 TCP1 VRK3 WARS	GO:0017076.MF.purine nucleotide binding	0	0	1
	GO:0005634	ACTN4 ARL4A ASCC3L1 ATN1 AXIN1 CABIN1 CALCOCO2 CCNF CDKN1C CEP110 CNOT2 CRSP2 CSRP1 CTDSP1 CTDSP2 CUL3 DACH1 DDB2 DIDO1 DKFZP686P18101 EED EIF4ENIF1 ELF4 EZH2 GARNL1 GLIS3 GTF3C1 HDAC6 HES1 HNRPM JMJD1A KBTBD9 LRDD LRRFIP1 LZTS1 MKL2 MLLT10 MSH4 NACA NDRG1 NPIP PARP9 PCBP2 PDZD2 POLA2 PSMB2 RANBP9 RBBP6 RFX2 RORA SFRS5 SFRS7 SMU1 SMYD3 SP3 STAT3 STAT5A STK35 SUZ12 TCEA1 TFAP2E THRAP2 TOP2A TRIOBP…	AFF4 ANAPC10 API5 ATF3 ATP11B CACYBP CBX3 CCNA2 CCND2 CCRN4L CDC73 DHCR24 DHCR7 DTNBP1 DUSP10 ERCC8 ESRRB EXO1 FGF12 GLRX2 GTF2H1 HIP2 HNRPD HNRPDL HSPA8 KLF12 LSM6 MAD2L1 MTMR2 PBX1 PIK3C2A PLRG1 POLR2B POLR3K PRDM8 PRMT8 PUS3 RORB SAS10 SESN2 SLA/LP SMARCA5 STIP1 TAX1BP3 TERF2 TSC22D1 UBE2N ZNF197 ZNF451 ZNF770	GO:0005634.CC.nucleus	0	0	1
	GO:0043412	ANUBL1 C17orf27 CDK3 CSNK2A1 CUL3 DKFZp761P0423 DPH5 FBXO11 FBXW4 FGFR3 FNTB HDAC6 LRRK2 MAP1LC3A MAP4K3 MAPK8 MARK3 MGAT5 MTMR3 MXRA5 PAN3 PARP9 PCTK1 PCTK2 PDK2 PHKA2 PRKAR1A PRKCH PSMB2 PSMB9 PTEN RBBP6 SOCS1 SRPK3 STK24 STK35 TNK2 TRIO TRIOBP TTLL5 TTN UBE1C UBE2E3 UBE2I ULK1 USP34 USP7 USP9X	ANAPC10 B3GALT1 CACYBP CDC25A CUL5 DUSP10 FBXO28 GLRX2 HERC4 HERPUD1 HIP2 LDLR MTMR2 MTMR6 MVK PDP2 PRKAA2 PRMT8 PSMA7 SPCS3 TM4SF4 TRHDE UBE2D1 UBE2D3 UBE2N UCHL5 USP38 USP46 USP49 VRK3	GO:0043412.BP.biopolymer modification	0	0	1
	GO:0030554	ABCA2 ABCC8 ACACB ASCC3L1 ATP2B3 CDK3 CSNK2A1 DKFZp761P0423 DUOX1 DUOX2 FGFR3 LOC146909 LRRK2 MAP4K3 MAPK8 MARK3 MSH4 MXRA5 MYO10 MYO1E MYO7A NOS1 PAN3 PCTK1 PCTK2 PDK2 PRKAR1A PRKCH SMC5 SRPK3 STEAP3 STK24 STK35 TNK2 TOP2A TRIO TTLL5 TTN UBE1C ULK1	AARS ABCC5 ABCE1 ATP11B CARS CCT2 CCT8 DYNC2H1 GART GRPEL1 HSPA4 HSPA8 HSPA9B HSPH1 LARS MAGI1 MARS MVD MVK PAICS PRKAA2 SARS SMARCA5 TAX1BP3 TCP1 VRK3 WARS	GO:0030554.MF.adenyl nucleotide binding	0	0	1
	GO:0043170	ABCC8 ADAMTS2 ANUBL1 AP1G2 ARL4A ASCC3L1 C17orf27 CDK3 CFLAR CSNK2A1 CTNNA1 CUL3 DDB2 DKFZP686P18101 DKFZp761P0423 DNAJA4 DPH5 EXOSC6 EZH2 FBXO11 FBXW4 FGFR3 FLJ21865 FLJ35220 FNTB GFPT2 GPD2 GSN GUSB HDAC6 HEXDC HNRPM HS3ST4 IGFBP4 IMMP2L JMJD1A KLK12 LOC91316 LRRK2 MAP1LC3A MAP4K3 MAPK8 MARK3 MGAT5 MMP14 MSH4 MTMR3 MXRA5 NACA NPEPL1 PAN3 PARP9 PCBP2 PCTK1 PCTK2 PDK2 PHKA2 POLA2 PRKAR1A PRKCH PS…	AARS ABCE1 ANAPC10 ARF4 B3GALT1 BAG2 CACYBP CARS CASP3 CBX3 CCT2 CCT8 CDC25A CUL5 DENR DLAT DUSP10 EGLN1 EIF4E EIF4G2 ERCC8 EXO1 FBXO28 GFM2 GLRX2 GRPEL1 GRSF1 GTF2H1 HERC4 HERPUD1 HIP2 HNRPD HNRPDL HSPA4 HSPA8 HSPA9B HSPH1 KCNQ5 LARS LDLR LSM6 MAGI1 MAP4 MARS MPI MRPL1 MRPL13 MRPL44 MTMR2 MTMR6 MTO1 MVK NEU1 OGFOD1 PDP2 PGD PGM2 PLRG1 PPID PRKAA2 PRMT8 PSMA7 PUS3 SARS SAS10 SCYE1 SLA/LP SLC3A2 S…	GO:0043170.BP.macromolecule metabolic process	0	0	1
	GO:0050791	ACTN4 ANKH ARHGEF11 AXIN1 BCAR1 CCNF CCNG2 CDK3 CDKN1C CFLAR CNOT2 CRSP2 CUL3 DACH1 DIDO1 DKFZP686P18101 EED ELF4 EZH2 FLCN GLIS3 GSN HDAC6 HES1 IGFBP4 JMJD1A LAMA5 LDLRAP1 LGALS1 LRRFIP1 LZTS1 MKL2 MLLT10 MTCP1 NF1 NOTCH3 PCTK1 PCTK2 PDPN PGF PRKAR1A PTEN RFX2 RORA SOCS1 SP3 STAT3 STAT5A SUZ12 TBC1D8 TCEA1 TFAP2E THRAP2 TIMP3 TMF1 TNK2 TOB1 TRIOBP TRIP6 UBE2E3 ZBTB5 ZNF500	AFF4 ANAPC10 API5 ATF3 CASP3 CBX3 CCNA2 CCND2 CCT2 CDC25A CDC73 CUL5 CXCL5 DHCR24 EIF4E EIF4G2 ERCC8 ESRRB GLRX2 GTF2H1 HIP2 HNRPD HSPA9B KLF12 MAD2L1 MAP4 PBX1 PDCD5 PHF23 POLR3K PRDM8 RORB SESN2 SLA/LP SMARCA5 SOCS2 TERF2 TM4SF4 TSC22D1 UBE2N VEGFC WARS ZNF197 ZNF451	GO:0050791	0	0	1
	GO:0050794	ACTN4 ARHGEF11 ARHGEF12 ARHGEF4 AXIN1 BCAR1 CCNF CCNG2 CDK3 CDKN1C CFLAR CNOT2 CRSP2 CUL3 DACH1 DIDO1 DKFZP686P18101 EED ELF4 EZH2 FARP2 FLCN GLIS3 GSN HDAC6 HES1 IGFBP4 JMJD1A KIAA1909 LAMA5 LDLRAP1 LGALS1 LRRFIP1 LZTS1 MKL2 MLLT10 MTCP1 NF1 NOTCH3 PCTK1 PCTK2 PDPN PGF PRKAR1A PTEN RFX2 RORA SOCS1 SP3 STAT3 STAT5A SUZ12 TBC1D8 TCEA1 TFAP2E THRAP2 TIMP3 TMF1 TNK2 TOB1 TRIO TRIOBP TRIP6 UBE2E3 VAV…	AFF4 ANAPC10 API5 ATF3 CASP3 CBX3 CCNA2 CCND2 CCT2 CDC25A CDC73 CUL5 CXCL5 DHCR24 EIF4E EIF4G2 ERCC8 ESRRB GLRX2 GTF2H1 HIP2 HNRPD HSPA9B KLF12 MAD2L1 MAP4 PBX1 PDCD5 PHF23 POLR3K PRDM8 RORB SESN2 SLA/LP SMARCA5 SOCS2 SPRED1 TAX1BP3 TERF2 TFG TM4SF4 TSC22D1 UBE2N VEGFC WARS ZNF197 ZNF451	GO:0050794.BP.regulation of cellular process	0	0	1
	GO:0043283	ADAMTS2 ANUBL1 ARL4A ASCC3L1 C17orf27 CDK3 CSNK2A1 CUL3 DDB2 DKFZP686P18101 DKFZp761P0423 DPH5 EXOSC6 EZH2 FBXO11 FBXW4 FGFR3 FLJ35220 FNTB HDAC6 HNRPM IGFBP4 JMJD1A LRRK2 MAP1LC3A MAP4K3 MAPK8 MARK3 MGAT5 MSH4 MTMR3 MXRA5 PAN3 PARP9 PCBP2 PCTK1 PCTK2 PDK2 PHKA2 POLA2 PRKAR1A PRKCH PSMB2 PSMB9 PTEN RBBP6 RBPMS RG9MTD3 SFRS5 SFRS7 SMYD3 SOCS1 SRPK3 STK24 STK35 SUZ12 TNK2 TOP1 TOP2A TRIO TRIOBP TTL…	AARS ANAPC10 ARF4 B3GALT1 CACYBP CARS CBX3 CDC25A CUL5 DUSP10 ERCC8 EXO1 FBXO28 GLRX2 GRSF1 GTF2H1 HERC4 HERPUD1 HIP2 HNRPD HNRPDL LARS LDLR LSM6 MARS MRPL44 MTMR2 MTMR6 MTO1 MVK PDP2 PLRG1 PRKAA2 PRMT8 PSMA7 PUS3 SARS SAS10 SCYE1 SMARCA5 SPCS3 TM4SF4 TRHDE TRUB1 UBE2D1 UBE2D3 UBE2N UCHL5 USP38 USP46 USP49 VRK3 WARS	GO:0043283.BP.biopolymer metabolic process	0	0	1
	GO:0043226	ABCA2 ACTN4 AFTPH AP1G2 AP3B1 ARL4A ARSD ASCC3L1 ATN1 ATP5C1 AXIN1 CABIN1 CALCOCO2 CALU CCNF CDKN1C CDS2 CEP110 CEP250 CNOT2 COX4I2 COX6A1 CRSP2 CSRP1 CTDSP1 CTDSP2 CTNNA1 CUL3 CYP2D6 DACH1 DDB2 DIDO1 DIP DKFZP686P18101 EED EIF4ENIF1 ELF4 EML4 EZH2 FARP2 FMN2 GARNL1 GLIS3 GPD2 GSN GTF3C1 GUSB HDAC6 HES1 HHAT HNRPM ITPR3 JMJD1A KBTBD9 KTN1 LAMP2 LDLRAP1 LOC146909 LRDD LRRFIP1 LZTS1 MAP1LC3A MGAT5 …	ABCE1 ACSL3 AFF4 ANAPC10 API5 ASAH1 ATF3 ATP11B CACYBP CBX3 CCNA2 CCND2 CCRN4L CDC73 CES2 CLCN3 DHCR24 DHCR7 DLAT DTNBP1 DUSP10 DYNC2H1 ELMOD2 ERCC8 ESRRB ETFDH EXO1 FDFT1 FDX1 FGF12 FXC1 GFM2 GLRX2 GRPEL1 GTF2H1 HERPUD1 HIP2 HMGCR HNRPD HNRPDL HSPA8 HSPA9B KLF12 KRTAP4-7 LSM6 MAD2L1 MAP4 MRPL1 MRPL13 MRPL44 MTMR2 MTO1 MVK NEU1 PBX1 PDP2 PIK3C2A PLRG1 POLR2B POLR3K PPA2 PRDM8 PRMT8 PUS3 RAB6A RAP…	GO:0043226.CC.organelle	0	0	1
	GO:0043227	ABCA2 ACTN4 AFTPH AP1G2 AP3B1 ARL4A ARSD ASCC3L1 ATN1 ATP5C1 AXIN1 CABIN1 CALCOCO2 CALU CCNF CDKN1C CDS2 CEP110 CNOT2 COX4I2 COX6A1 CRSP2 CSRP1 CTDSP1 CTDSP2 CUL3 CYP2D6 DACH1 DDB2 DIDO1 DIP DKFZP686P18101 EED EIF4ENIF1 ELF4 EZH2 GARNL1 GLIS3 GPD2 GTF3C1 GUSB HDAC6 HES1 HHAT HNRPM ITPR3 JMJD1A KBTBD9 KTN1 LAMP2 LDLRAP1 LRDD LRRFIP1 LZTS1 MAP1LC3A MGAT5 MKL2 MLLT10 MON2 MSH4 MTCP1 NACA NDRG1 NDUFB…	ABCE1 ACSL3 AFF4 ANAPC10 API5 ASAH1 ATF3 ATP11B CACYBP CBX3 CCNA2 CCND2 CCRN4L CDC73 CES2 CLCN3 DHCR24 DHCR7 DLAT DTNBP1 DUSP10 DYNC2H1 ERCC8 ESRRB ETFDH EXO1 FDFT1 FDX1 FGF12 FXC1 GFM2 GLRX2 GRPEL1 GTF2H1 HERPUD1 HIP2 HMGCR HNRPD HNRPDL HSPA8 HSPA9B KLF12 LSM6 MAD2L1 MRPL1 MRPL13 MRPL44 MTMR2 MTO1 MVK NEU1 PBX1 PDP2 PIK3C2A PLRG1 POLR2B POLR3K PPA2 PRDM8 PRMT8 PUS3 RAB6A RORB SAS10 SC4MOL SCD SE…	GO:0043227.CC.membrane-bound organelle	0	0	1
	GO:0043229	ABCA2 ACTN4 AFTPH AP1G2 AP3B1 ARL4A ARSD ASCC3L1 ATN1 ATP5C1 AXIN1 CABIN1 CALCOCO2 CALU CCNF CDKN1C CDS2 CEP110 CEP250 CNOT2 COX4I2 COX6A1 CRSP2 CSRP1 CTDSP1 CTDSP2 CTNNA1 CUL3 CYP2D6 DACH1 DDB2 DIDO1 DIP DKFZP686P18101 EED EIF4ENIF1 ELF4 EML4 EZH2 FARP2 FMN2 GARNL1 GLIS3 GPD2 GSN GTF3C1 GUSB HDAC6 HES1 HHAT HNRPM ITPR3 JMJD1A KBTBD9 KTN1 LAMP2 LDLRAP1 LOC146909 LRDD LRRFIP1 LZTS1 MAP1LC3A MGAT5 …	ABCE1 ACSL3 AFF4 ANAPC10 API5 ASAH1 ATF3 ATP11B CACYBP CBX3 CCNA2 CCND2 CCRN4L CDC73 CES2 CLCN3 DHCR24 DHCR7 DLAT DTNBP1 DUSP10 DYNC2H1 ELMOD2 ERCC8 ESRRB ETFDH EXO1 FDFT1 FDX1 FGF12 FXC1 GFM2 GLRX2 GRPEL1 GTF2H1 HERPUD1 HIP2 HMGCR HNRPD HNRPDL HSPA8 HSPA9B KLF12 KRTAP4-7 LSM6 MAD2L1 MAP4 MRPL1 MRPL13 MRPL44 MTMR2 MTO1 MVK NEU1 PBX1 PDP2 PIK3C2A PLRG1 POLR2B POLR3K PPA2 PRDM8 PRMT8 PUS3 RAB6A RAP…	GO:0043229.CC.intracellular organelle	0	0	1
	GO:0050789	ACTN4 ANKH ARHGEF11 ARHGEF12 ARHGEF4 AXIN1 BCAR1 CCNF CCNG2 CDK3 CDKN1C CFLAR CNOT2 CRSP2 CUL3 DACH1 DIDO1 DKFZP686P18101 EED ELF4 EZH2 FARP2 FLCN GLIS3 GNAI2 GSN HDAC6 HES1 IGFBP4 JMJD1A KIAA1909 LAMA5 LDLRAP1 LGALS1 LRRFIP1 LZTS1 MKL2 MLLT10 MTCP1 NF1 NOTCH3 PCTK1 PCTK2 PDPN PGF PRKAR1A PTEN RFX2 ROBO1 RORA SOCS1 SP3 STAT3 STAT5A SUZ12 TBC1D8 TCEA1 TFAP2E THRAP2 TIMP3 TMF1 TNK2 TOB1 TRIO TRIOBP…	AFF4 ANAPC10 API5 ATF3 CASP3 CBX3 CCNA2 CCND2 CCT2 CDC25A CDC73 CHML CUL5 CXCL5 DHCR24 EIF4E EIF4G2 ERCC8 ESRRB GLRX2 GTF2H1 HIP2 HNRPD HSPA9B KLF12 MAD2L1 MAP4 PBX1 PDCD5 PHF23 POLR3K PRDM8 PRMT8 RORB SESN2 SLA/LP SMARCA5 SOCS2 SPRED1 TAX1BP3 TERF2 TFG TM4SF4 TSC22D1 UBE2N VEGFC WARS ZNF197 ZNF451	GO:0050789.BP.regulation of biological process	0	0	1
	GO:0043231	ABCA2 ACTN4 AFTPH AP1G2 AP3B1 ARL4A ARSD ASCC3L1 ATN1 ATP5C1 AXIN1 CABIN1 CALCOCO2 CALU CCNF CDKN1C CDS2 CEP110 CNOT2 COX4I2 COX6A1 CRSP2 CSRP1 CTDSP1 CTDSP2 CUL3 CYP2D6 DACH1 DDB2 DIDO1 DIP DKFZP686P18101 EED EIF4ENIF1 ELF4 EZH2 GARNL1 GLIS3 GPD2 GTF3C1 GUSB HDAC6 HES1 HHAT HNRPM ITPR3 JMJD1A KBTBD9 KTN1 LAMP2 LDLRAP1 LRDD LRRFIP1 LZTS1 MAP1LC3A MGAT5 MKL2 MLLT10 MON2 MSH4 MTCP1 NACA NDRG1 NDUFB…	ABCE1 ACSL3 AFF4 ANAPC10 API5 ASAH1 ATF3 ATP11B CACYBP CBX3 CCNA2 CCND2 CCRN4L CDC73 CES2 CLCN3 DHCR24 DHCR7 DLAT DTNBP1 DUSP10 DYNC2H1 ERCC8 ESRRB ETFDH EXO1 FDFT1 FDX1 FGF12 FXC1 GFM2 GLRX2 GRPEL1 GTF2H1 HERPUD1 HIP2 HMGCR HNRPD HNRPDL HSPA8 HSPA9B KLF12 LSM6 MAD2L1 MRPL1 MRPL13 MRPL44 MTMR2 MTO1 MVK NEU1 PBX1 PDP2 PIK3C2A PLRG1 POLR2B POLR3K PPA2 PRDM8 PRMT8 PUS3 RAB6A RORB SAS10 SC4MOL SCD SE…	GO:0043231.CC.intracellular membrane-bound organelle	0	0	1
	GO:0043233	CRSP2 ELF4 GTF3C1 HDAC6 XPO1	DLAT ERCC8 FXC1 GRPEL1 GTF2H1 MRPL13 POLR2B POLR3K SMARCA5 TIMM8B	GO:0043233.CC.organelle lumen	0	0	1
	GO:0050875	ABCA2 ABCC8 ACACB ACTN4 ADAMTS2 AFTPH ALDH1A3 ANKH ANUBL1 AP1G2 AP3B1 ARHGEF11 ARL4A AS3MT ASCC3L1 ATP2B3 ATP5C1 AXIN1 BCAR1 C17orf27 CCNF CCNG2 CDK3 CDKN1C CDS2 CEP250 CFLAR CHRNB4 CNOT2 COL13A1 COL5A1 COL9A3 COX4I2 COX6A1 CRSP2 CSNK2A1 CTNNA1 CUL3 CYP2D6 DAAM1 DACH1 DDB2 DIDO1 DKFZP686P18101 DKFZp761P0423 DNAJA4 DPH5 DUOX1 DUOX2 EED EIF4ENIF1 ELF4 EML4 EXOSC6 EZH2 FBXO11 FBXW4 FGFR3 FLCN FLJ352…	AARS AASDHPPT ABCC5 ABCE1 ACSL3 AFF4 ANAPC10 API5 ARF4 ASAH1 ASNS ATF3 ATP11B ATP6V0A2 B3GALT1 BAG2 CACNA1I CACYBP CARS CASP3 CBX3 CCNA2 CCND2 CCRN4L CCT2 CCT8 CDC25A CDC73 CHML CLCN3 CTH CUL5 CXCL5 CYP51A1 DDAH1 DENR DHCR24 DHCR7 DLAT DTNBP1 DUSP10 DYNC2H1 EIF4E EIF4G2 ELMOD2 ERCC8 ESRRB ETFDH ETNK1 EXO1 FBXO28 FDFT1 FDPS FDX1 FLAD1 FXC1 GART GFM2 GLRX2 GRPEL1 GRSF1 GTF2H1 HERC4 HERPUD1 HIP2 HMG…	GO:0050875	0	0	1
	GO:0007582	ABCA2 ABCC8 ACACB ACTN4 ADAMTS2 AFTPH ALDH1A3 ANKH ANUBL1 AP1G2 AP3B1 ARHGEF11 ARL4A ARRB1 ARSD AS3MT ASCC3L1 ATP2B3 ATP5C1 AXIN1 BCAR1 C17orf27 CCNF CCNG2 CDK3 CDKN1C CDS2 CEP250 CFLAR CHRNB4 CNOT2 COL13A1 COL5A1 COL9A3 COX4I2 COX6A1 CRSP2 CSNK2A1 CTNNA1 CUL3 CYP2D6 DAAM1 DACH1 DDB2 DIDO1 DIP DKFZP686P18101 DKFZp761P0423 DNAJA4 DPH5 DUOX1 DUOX2 ECHDC2 EED EIF4ENIF1 ELF4 EML4 EXOSC6 EZH2 FBXO11 F…	AARS AASDHPPT ABCC5 ABCE1 ACAT2 ACSL3 AFF4 ANAPC10 API5 ARF4 ASAH1 ASNS ATF3 ATP11B ATP6V0A2 B3GALT1 BAG2 CACNA1I CACYBP CARS CASP3 CBX3 CCNA2 CCND2 CCRN4L CCT2 CCT8 CDC25A CDC73 CES2 CHML CLCN3 CTH CUL5 CXCL5 CYP51A1 CYSLTR2 DDAH1 DENR DHCR24 DHCR7 DLAT DTNBP1 DUSP10 DYNC2H1 EGLN1 EIF4E EIF4G2 ELMOD2 ERCC8 ESRRB ETFDH ETNK1 EXO1 FBXO28 FDFT1 FDPS FDX1 FLAD1 FXC1 GART GFM2 GLRX2 GRPEL1 GRSF1 GTF2…	GO:0007582	0	0	1
	GO:0006396	ARL4A ASCC3L1 EXOSC6 HNRPM RBPMS RG9MTD3 SFRS5 SFRS7 XPO1	AARS ARF4 GRSF1 HNRPD HNRPDL LSM6 MRPL44 MTO1 PLRG1 PUS3 SARS TRUB1	GO:0006396.BP.RNA processing	0	0	1
	GO:0016070	ARL4A ASCC3L1 EXOSC6 HNRPM PCBP2 RBPMS RG9MTD3 SFRS5 SFRS7 XPO1	AARS ARF4 CARS GRSF1 HNRPD HNRPDL LARS LSM6 MARS MRPL44 MTO1 PLRG1 PUS3 SARS SCYE1 TRUB1 WARS	GO:0016070.BP.RNA metabolic process	0	0	1
	GO:0006464	ANUBL1 C17orf27 CDK3 CSNK2A1 CUL3 DKFZp761P0423 DPH5 FBXO11 FBXW4 FGFR3 FNTB HDAC6 LRRK2 MAP1LC3A MAP4K3 MAPK8 MARK3 MGAT5 MTMR3 MXRA5 PAN3 PARP9 PCTK1 PCTK2 PDK2 PHKA2 PRKAR1A PRKCH PSMB2 PSMB9 PTEN RBBP6 SOCS1 SRPK3 STK24 STK35 TNK2 TRIO TRIOBP TTLL5 TTN UBE1C UBE2E3 UBE2I ULK1 USP34 USP7 USP9X	ANAPC10 B3GALT1 CACYBP CDC25A CUL5 DUSP10 FBXO28 GLRX2 HERC4 HERPUD1 HIP2 LDLR MTMR2 MTMR6 MVK PDP2 PRKAA2 PRMT8 PSMA7 SPCS3 TM4SF4 TRHDE UBE2D1 UBE2D3 UBE2N UCHL5 USP38 USP46 USP49 VRK3	GO:0006464.BP.protein modification	0	0	1
	GO:0006139	ARHGEF11 ARL4A ASCC3L1 ATP5C1 CNOT2 CRSP2 DACH1 DDB2 DIDO1 DKFZP686P18101 EED ELF4 EXOSC6 EZH2 FLJ35220 GLIS3 GTF3C1 HDAC6 HES1 HNRPM IGFBP4 JMJD1A LRRFIP1 LZTS1 MKL2 MLLT10 MSH4 NACA NOTCH3 PCBP2 POLA2 PRKAR1A RBPMS RFX2 RG9MTD3 RORA SFRS5 SFRS7 SMYD3 SP3 STAT3 STAT5A SUZ12 TCEA1 TFAP2E THRAP2 TMF1 TOP1 TOP2A XPO1 ZBTB5 ZNF500	AARS AFF4 ARF4 ATF3 CARS CBX3 CCRN4L CDC73 ERCC8 ESRRB EXO1 GART GLRX2 GRSF1 GTF2H1 HIP2 HNRPD HNRPDL KLF12 LARS LSM6 MARS MRPL44 MTO1 PAICS PBX1 PGD PHF23 PLRG1 POLR2B POLR3K PRDM8 PRMT8 PUS3 RORB SARS SAS10 SCYE1 SMARCA5 TERF2 TRUB1 TSC22D1 UBE2N VRK3 WARS ZNF197 ZNF451	GO:0006139.BP.nucleobase, nucleoside, nucleotide and nucleic acid metabolic process	0	0	1
	GO:0006512	C17orf27 CUL3 FBXO11 FBXW4 MAP1LC3A PSMB2 PSMB9 RBBP6 SOCS1 UBE1C UBE2E3 UBE2I USP34 USP7 USP9X	ANAPC10 CACYBP CUL5 FBXO28 HERC4 HIP2 PSMA7 UBE2D1 UBE2D3 UBE2N UCHL5 USP38 USP46 USP49	GO:0006512.BP.ubiquitin cycle	0	0	45
	GO:0043234	ABCA2 ACTN4 AFTPH AP1G2 ARRB1 ASCC3L1 ATP5C1 CHRNB4 COX4I2 CRSP2 DIP FBXO11 FBXW4 GNAS GNG8 GPD2 GTF3C1 HBE1 HDAC6 HNRPM KCNS2 LAMA5 LDLRAP1 LOC146909 MYO10 MYO1E MYO7A NACA PCBP2 PHKA2 PRKAR1A PSMB2 PSMB9 RBBP6 TRIP6 TUBGCP6 XPO1	ANAPC10 API5 CACNA1I CHML DLAT EIF4E EIF4G2 ERCC8 FXC1 GTF2H1 HNRPD HNRPDL KCNQ5 LSM6 MAP4 MRPL1 MRPL13 MRPL44 PAICS PDP2 PIK3C2A PIK3R3 PLRG1 POLR2B POLR3K PPP2R5A PSMA7 SGCB SMARCA5 SPCS3 TIMM17A TIMM8B UBE2N UCHL5	GO:0043234.CC.protein complex	0	0	45
	GO:0044422	ABCA2 AFTPH AP1G2 ASCC3L1 ATP5C1 CDS2 CEP110 CEP250 COX4I2 COX6A1 CRSP2 DIP ELF4 EML4 GTF3C1 HDAC6 HNRPM KTN1 LAMP2 LDLRAP1 LOC146909 MAP1LC3A MGAT5 MON2 MYO10 MYO1E MYO7A PIK4CA TTN TUBGCP6 VIL2 XPO1	ANAPC10 API5 ATP11B CBX3 CLCN3 DHCR24 DHCR7 DLAT ERCC8 ETFDH FXC1 GRPEL1 GTF2H1 HERPUD1 HMGCR HNRPD HNRPDL KRTAP4-7 LSM6 MAD2L1 MAP4 MRPL1 MRPL13 PLRG1 POLR2B POLR3K SEC22B SMARCA5 SPCS3 TERF2 TIMM17A TIMM8B TOMM40L TRAPPC4 VAMP4	GO:0044422.CC.organelle part	0	0	47
	GO:0044446	ABCA2 AFTPH AP1G2 ASCC3L1 ATP5C1 CDS2 CEP110 CEP250 COX4I2 COX6A1 CRSP2 DIP ELF4 EML4 GTF3C1 HDAC6 HNRPM KTN1 LAMP2 LDLRAP1 LOC146909 MAP1LC3A MGAT5 MON2 MYO10 MYO1E MYO7A PIK4CA TTN TUBGCP6 VIL2 XPO1	ANAPC10 API5 ATP11B CBX3 CLCN3 DHCR24 DHCR7 DLAT ERCC8 ETFDH FXC1 GRPEL1 GTF2H1 HERPUD1 HMGCR HNRPD HNRPDL KRTAP4-7 LSM6 MAD2L1 MAP4 MRPL1 MRPL13 PLRG1 POLR2B POLR3K SEC22B SMARCA5 SPCS3 TERF2 TIMM17A TIMM8B TOMM40L TRAPPC4 VAMP4	GO:0044446.CC.intracellular organelle part	0	0	47
	GO:0016043	AP1G2 AP3B1 ARHGEF11 ARL4A BCAR1 CEP250 CTNNA1 DAAM1 EML4 EZH2 FGFR3 FMN2 GSN HDAC6 IGFBP4 JMJD1A KTN1 LOC146909 MAP1LC3A MON2 MYO1E MYO7A NPEPL1 NRXN1 NTNG2 PDPN RAB22A RANBP9 RGPD2 ROBO1 SMC5 SMYD3 SOCS1 SPON2 SUZ12 TLN1 TNK2 TRIOBP TRIP6 TUBGCP6 UBE2E3 VIL2 XPO1	ARF4 CBX3 CHML CLCN3 DTNBP1 DYNC2H1 FXC1 GRPEL1 HNRPD MAP4 PRMT8 RAB6A SAS10 SCAMP1 SEC22B SGCB SLC3A2 SMARCA5 SOCS2 TERF2 TIMM17A TIMM8B TRAPPC4	GO:0016043.BP.cell organization and biogenesis	0	0	49
	GO:0003723	C20orf119 CUGBP2 EXOSC6 HNRPM LRRFIP1 PCBP2 RBM33 RBPMS RC3H1 RG9MTD3 SFRS5 SFRS7 XPO1	AARS CARS EIF4E EIF4G2 GRSF1 HNRPD HNRPDL LSM6 MARS MRPL1 MRPL44 SARS SCYE1 SLA/LP	GO:0003723.MF.RNA binding	0	0	50
Analysis of Functional Annotation Gene Ontology results: XG versus CLX
The first 50 GO catergories that were enriched (adjusted P-value less than 0.05) are reported for the comparison between XG and CLX, along with the genes esponsible for the enrichment (B-statistics more than 1.1 corresponding to a probability of differential expression greater than 0.75).
GO2ALLPROBES_wXGvsCLX: - Enriched Gene Sets - Bstat = 1.1 - Probability > 0.75
	IDs	Genes_UP_Regulated_in_wXGvsCLX	Genes_DW_Regulated_in_wXGvsCLX	Description	Pval	BH-Pval	Rank
	GO:0009987	ABI1 ABI2 ACSL3 ACVR1B AKT1 APOL4 ARHGAP21 ARHGEF4 ARL9 AS3MT ASCC3L1 ATP1B1 ATP2B2 ATP2B3 ATP6AP1 BICD1 BIRC4 C10orf9 C17orf27 C1QL1 CABIN1 CARHSP1 CASK CDH22 CDKN1C CFLAR CHRNA3 CHRNB4 CHST1 CLASP1 CLDN23 CMKOR1 CNOT2 COL13A1 COL9A3 COX4I2 CP110 CRLS1 CROP CRSP2 DDR1 DDX17 DERA DHRS4 DKFZp761P0423 DNAJA4 DNAJC1 DPH5 DUOX1 ELF4 EXOSC6 FBXO4 FGD1 FGFR3 FMR1 FZD10 GLI2 GLIS3 GNG8 GPD2 H2AFY HDAC6 …	ABCE1 AFF4 ALAS2 ANAPC4 AQP12A ARID1B ATP5I BATF BDKRB1 BHLHB3 BMPR1B C15orf15 C18orf22 C4orf9 CA12 CACYBP CD36 CLNS1A COMT COX18 CREB5 CYP2D6 DLAT ELA3B ENG EPHA8 ESRRB ETFDH F2R FBXL18 FDX1 FXC1 GABRA5 GLP1R GPD1 GPR125 GRPEL1 HBB HBQ1 HNRPD ICAM1 IL9R ITPR2 KATNB1 LOC127406 MGC13098 MKL1 MMP28 MPI NDFIP1 NFXL1 NR6A1 PARVA PDP2 PGD PLEK POFUT2 PPID PRDM4 PSMA1 PUS3 PWP1 RAB27B RNF125 RORB SCYE1…	GO:0009987.BP.cellular process	0	0	1
	GO:0044464	ABI1 ABI2 ACSL3 ACVR1B AKT1 ARHGAP21 ARHGEF4 ARMCX4 ARSD AS3MT ASCC3L1 ATP1B1 ATP2B2 ATP2B3 ATP6AP1 ATP6AP2 BICD1 BIRC4 C1QL1 C20orf108 CABIN1 CACNA2D2 CASK CDH22 CDKN1C CEP110 CEP350 CHRNA3 CHRNB4 CHST1 CLASP1 CLDN23 CMKOR1 CNOT2 COL13A1 COL9A3 COX4I2 CP110 CRLS1 CROP CRSP2 CSRP1 DDR1 DDX17 DERA DHRS4 DNAJC1 DUOX1 ELF4 FBXO4 FGD1 FGFR3 FMR1 FUS FZD10 GARNL1 GLI2 GLIS3 GNG8 GPD2 H2AFY HDAC6 HHAT …	ABCE1 AFF4 ALAS2 AMN ANAPC4 ANKRD11 AQP12A ARID1B ATP5I BATF BDKRB1 BHLHB3 BMPR1B BPI C15orf15 C18orf22 C4orf14 C4orf9 C6orf162 CA12 CACYBP CD36 CLNS1A COMMD8 COMT COX18 CREB5 CYP2D6 DLAT ENG EPHA8 ESRRB ETFDH F2R FAM38B FBXL18 FDX1 FXC1 GABRA5 GLP1R GPD1 GPR125 GPR180 GRPEL1 HBB HBQ1 HNRPD ICAM1 IL9R ITPR2 JTB KATNB1 KIAA0409 LOC127406 MGC13098 MKL1 NDFIP1 NFXL1 NR6A1 PAQR3 PARVA PDP2 PRDM4 PSMA…	GO:0044464.CC.cell part	0	0	1
	GO:0044424	ABI1 ABI2 ACSL3 AKT1 ARSD AS3MT ASCC3L1 ATP6AP1 BICD1 BIRC4 C1QL1 CABIN1 CASK CDKN1C CEP110 CEP350 CHST1 CLASP1 CNOT2 COL13A1 COL9A3 COX4I2 CP110 CRLS1 CROP CRSP2 CSRP1 DDX17 DERA DHRS4 DNAJC1 ELF4 FBXO4 FGD1 FMR1 FUS GARNL1 GLI2 GLIS3 GPD2 H2AFY HDAC6 HHAT HNRPM IREB2 JMJD1A JMJD1C JMJD2B LAMP2 LZTS1 MEF2A MGAT5 MIER3 MKL2 MKLN1 MSH4 MTMR3 MYBL1 MYT1 NCF1 NCOA1 NIPBL OCRL PARP9 PCYT1B PDK2 PDPK1…	ABCE1 AFF4 ALAS2 ANAPC4 ANKRD11 ARID1B ATP5I BATF BDKRB1 BHLHB3 C15orf15 C18orf22 C4orf9 CACYBP CLNS1A COMMD8 COX18 CREB5 CYP2D6 DLAT ESRRB ETFDH F2R FBXL18 FDX1 FXC1 GPD1 GRPEL1 HBB HBQ1 HNRPD ITPR2 KATNB1 KIAA0409 LOC127406 MGC13098 MKL1 NFXL1 NR6A1 PARVA PDP2 PRDM4 PSMA1 PSMD7 PUS3 PWP1 RCHY1 RORB SLA/LP SLC37A4 SNRPA1 SPCS1 SRP72 THYN1 TNNT3 TOMM20 TPM3 TSEN2 ZNF330 ZNF496	GO:0044424.CC.intracellular part	0	0	1
	GO:0008152	ABI2 ACSL3 ACVR1B AKT1 APOL4 ARSD AS3MT ASCC3L1 ATP2B2 ATP2B3 ATP6AP1 BICD1 C17orf27 CARHSP1 CASK CFLAR CHST1 CLASP1 CNOT2 COX4I2 CRLS1 CRSP2 DDR1 DDX17 DERA DHRS4 DKFZp761P0423 DNAJA4 DNAJC1 DPH5 DUOX1 ECHDC2 ELF4 EXOSC6 FBXO4 FGFR3 FMR1 GLI2 GLIS3 GPD2 H2AFY HDAC6 HNRPM IGFBP4 IREB2 JMJD1A JMJD1C JMJD2B KCNH2 LNPEP LZTS1 MAPK1 MEF2A MGAT5 MGLL MIER3 MKL2 MSH4 MTMR3 MXRA5 MYBL1 MYT1 NCF1 NCOA1 N…	ABCE1 AFF4 ALAS2 ANAPC4 ARID1B ATP5I BATF BHLHB3 BMPR1B C15orf15 C18orf22 C4orf9 CA12 CACYBP CD36 CECR7 COMT CREB5 CYP2D6 DLAT ELA3B EPHA8 ESRRB ETFDH F2R FBXL18 FDX1 GPD1 GRPEL1 HBB HNRPD KATNB1 LOC127406 LOC91316 MGC13098 MKL1 MMP28 MPI NFXL1 NR6A1 PDP2 PGD PLA2G12A POFUT2 PPID PRDM4 PSMA1 PUS3 PWP1 RNF125 RORB SCYE1 SLA/LP SLC28A1 SLC37A4 SLC7A11 SNRPA1 SPCS1 SPN SRP72 TMPRSS11D TRHDE TSEN2 UB…	GO:0008152.BP.metabolic process	0	0	1
	GO:0044237	ABI2 ACSL3 ACVR1B AKT1 APOL4 AS3MT ASCC3L1 ATP6AP1 BICD1 C17orf27 CARHSP1 CASK CFLAR CHST1 CLASP1 CNOT2 COX4I2 CRLS1 CRSP2 DDR1 DDX17 DERA DHRS4 DKFZp761P0423 DNAJA4 DNAJC1 DPH5 DUOX1 ELF4 EXOSC6 FBXO4 FGFR3 FMR1 GLI2 GLIS3 GPD2 H2AFY HDAC6 HNRPM IGFBP4 JMJD1A JMJD1C JMJD2B KCNH2 LNPEP LZTS1 MAPK1 MEF2A MGAT5 MGLL MIER3 MKL2 MSH4 MTMR3 MXRA5 MYBL1 MYT1 NCF1 NCOA1 NOS1 PAN3 PARP9 PCTK1 PCTK2 PCYT1…	ABCE1 AFF4 ALAS2 ANAPC4 ARID1B ATP5I BATF BHLHB3 BMPR1B C15orf15 C18orf22 C4orf9 CA12 CACYBP CD36 COMT CREB5 CYP2D6 DLAT ELA3B EPHA8 ESRRB ETFDH F2R FBXL18 FDX1 GPD1 GRPEL1 HNRPD KATNB1 LOC127406 MGC13098 MKL1 MMP28 MPI NFXL1 NR6A1 PDP2 PGD POFUT2 PPID PRDM4 PSMA1 PUS3 PWP1 RNF125 RORB SCYE1 SLA/LP SLC28A1 SLC37A4 SNRPA1 SPCS1 SPN SRP72 TMPRSS11D TRHDE TSEN2 UBE2D3 VRK3 ZNF496	GO:0044237.BP.cellular metabolic process	0	0	1
	GO:0044238	ACSL3 ACVR1B AKT1 APOL4 ASCC3L1 ATP6AP1 BICD1 C17orf27 CARHSP1 CASK CFLAR CHST1 CLASP1 CNOT2 CRLS1 CRSP2 DDR1 DDX17 DERA DKFZp761P0423 DNAJA4 DNAJC1 DPH5 ELF4 EXOSC6 FBXO4 FGFR3 FMR1 GLI2 GLIS3 GPD2 H2AFY HDAC6 HNRPM IGFBP4 JMJD1A JMJD1C JMJD2B KCNH2 LNPEP LZTS1 MAPK1 MEF2A MGAT5 MGLL MIER3 MKL2 MSH4 MTMR3 MXRA5 MYBL1 MYT1 NCOA1 OCRL PAN3 PARP9 PCTK1 PCTK2 PCYT1B PDK2 PDPK1 PGS1 PHKA2 PIK4CA PITP…	ABCE1 AFF4 ANAPC4 ARID1B ATP5I BATF BHLHB3 BMPR1B C15orf15 C18orf22 C4orf9 CACYBP CD36 COMT CREB5 DLAT ELA3B EPHA8 ESRRB F2R FBXL18 FDX1 GPD1 GRPEL1 HNRPD KATNB1 LOC127406 LOC91316 MGC13098 MKL1 MMP28 MPI NFXL1 NR6A1 PDP2 PGD PLA2G12A POFUT2 PPID PRDM4 PSMA1 PUS3 PWP1 RNF125 RORB SCYE1 SLA/LP SLC28A1 SLC37A4 SLC7A11 SNRPA1 SPCS1 SPN SRP72 TMPRSS11D TRHDE TSEN2 UBE2D3 VRK3 ZNF496	GO:0044238.BP.primary metabolic process	0	0	1
	GO:0005488	ABI1 ABI2 ABTB1 ACSL3 ACVR1B AKT1 APOL4 ARHGAP21 ARL9 ARSD ASCC3L1 ATAD2 ATP1B1 ATP2B2 ATP2B3 ATP6AP1 BIRC4 BTBD3 C17orf27 CABIN1 CARHSP1 CASK CDH22 CDKAL1 CDKN1C CFLAR CHRNA3 CHRNB4 CLASP1 CLDN23 CP110 CROP CRSP2 CSRP1 CST3 DDR1 DDX17 DKFZp761P0423 DNAJA4 DNAJC1 DUOX1 EFHC2 ELF4 EXOSC6 FGD1 FGFR3 FMR1 FUS GLI2 GLIS3 GPD2 GPRASP1 H2AFY HDAC6 HELLS HHAT HNRPM HRBL IGFBP4 IREB2 ITGAV JMJD1A JMJD1C …	ABCE1 AFF4 ARID1B ATP5I BATF BDKRB1 BHLHB3 BMPR1B BPI C4orf14 CA12 CD36 COMT CREB5 CRTAP CYP2D6 DLAT ENG EPHA8 ESRRB ETFDH F2R FBXL18 FDX1 FXC1 GABRA5 GLP1R GPD1 GRPEL1 HBB HBQ1 HNRPD ICAM1 IL9R ITPR2 KATNB1 KLHL17 KLHL18 LOC91316 MGC13098 MKL1 MMP28 MPI NFXL1 NR6A1 PARVA PDP2 PGD PLA2G12A PLEK PPID PRDM4 PSMA1 PSPC1 RAB27B RAET1E RCHY1 RNF125 RORB SCYE1 SLA/LP SLC28A1 SLC39A5 SNRPA1 SPN SPON1 SR…	GO:0005488.MF.binding	0	0	1
	GO:0005737	ABI1 ABI2 ACSL3 AKT1 ARSD AS3MT ATP6AP1 BIRC4 C1QL1 CEP110 CHST1 CLASP1 COL13A1 COL9A3 COX4I2 CP110 CRLS1 DERA DHRS4 DNAJC1 FGD1 FMR1 GPD2 HDAC6 HHAT IREB2 LAMP2 LZTS1 MGAT5 MKLN1 MTMR3 NCF1 OCRL PCYT1B PDK2 PDPK1 PGS1 PIK4CA PXMP4 RRAGB RRM2 RSN RTN4 SEC22C SEC61B SMG1 SOCS1 SRP54 SSH1 WDFY1	ABCE1 ALAS2 ATP5I BDKRB1 C15orf15 C18orf22 COMMD8 COX18 CYP2D6 DLAT ETFDH F2R FBXL18 FDX1 FXC1 GPD1 GRPEL1 HBB HBQ1 HNRPD ITPR2 KATNB1 LOC127406 PDP2 PSMA1 PSMD7 RCHY1 SLA/LP SLC37A4 SPCS1 SRP72 TNNT3 TOMM20 TPM3	GO:0005737.CC.cytoplasm	0	0	1
	GO:0003674	ABI1 ABI2 ABTB1 ACSL3 ACVR1B AKT1 APOL4 ARHGAP21 ARHGEF4 ARL9 ARSD AS3MT ASCC3L1 ATAD2 ATP1B1 ATP2B2 ATP2B3 ATP6AP1 ATP6AP2 BICD1 BIRC4 BTBD3 C17orf27 C1QL1 CABIN1 CARHSP1 CASK CDH22 CDKAL1 CDKN1C CEP110 CFLAR CHRNA3 CHRNB4 CHST1 CLASP1 CLDN23 CMKOR1 CNOT2 COL9A3 COX4I2 CP110 CRLS1 CROP CRSP2 CSRP1 CST3 DDR1 DDX17 DERA DHRS4 DKFZp547E087 DKFZp761P0423 DNAJA4 DNAJC1 DPH5 DUOX1 ECHDC2 EFHC2 ELF4 EX…	ABCE1 AFF4 ALAS2 ANAPC4 AQP12A ARID1B ATP5I BATF BDKRB1 BHLHB3 BMPR1B BPI C15orf15 C4orf14 CA12 CD36 CECR7 CLNS1A COMT CREB5 CRTAP CYP2D6 DLAT ELA3B ENG EPHA8 ESRRB ETFDH F2R FBXL18 FDX1 FXC1 GABRA5 GLP1R GPD1 GPR125 GRPEL1 HAGHL HBB HBQ1 HNRPD ICAM1 IL9R ITPR2 KATNB1 KLHL17 KLHL18 LOC127406 LOC91316 MGC13098 MKL1 MMP28 MPI NDFIP1 NFXL1 NR6A1 OTUD4 PAQR3 PARVA PDP2 PGD PLA2G12A PLEK POFUT2 PPID P…	GO:0003674.MF.molecular_function	0	0	1
	GO:0005622	ABI1 ABI2 ACSL3 AKT1 ARHGAP21 ARHGEF4 ARSD AS3MT ASCC3L1 ATP6AP1 BICD1 BIRC4 C1QL1 CABIN1 CASK CDKN1C CEP110 CEP350 CHST1 CLASP1 CNOT2 COL13A1 COL9A3 COX4I2 CP110 CRLS1 CROP CRSP2 CSRP1 DDX17 DERA DHRS4 DNAJC1 ELF4 FBXO4 FGD1 FMR1 FUS GARNL1 GLI2 GLIS3 GPD2 H2AFY HDAC6 HHAT HNRPM IREB2 JMJD1A JMJD1C JMJD2B LAMP2 LNPEP LOC81691 LZTS1 MEF2A MGAT5 MIER3 MKL2 MKLN1 MSH4 MTMR3 MYBL1 MYT1 NCF1 NCOA1 NI…	ABCE1 AFF4 ALAS2 ANAPC4 ANKRD11 ARID1B ATP5I BATF BDKRB1 BHLHB3 C15orf15 C18orf22 C4orf14 C4orf9 CACYBP CLNS1A COMMD8 COX18 CREB5 CYP2D6 DLAT ESRRB ETFDH F2R FBXL18 FDX1 FXC1 GPD1 GRPEL1 HBB HBQ1 HNRPD ITPR2 KATNB1 KIAA0409 LOC127406 MGC13098 MKL1 NFXL1 NR6A1 PARVA PDP2 PRDM4 PSMA1 PSMD7 PUS3 PWP1 RCHY1 RNF125 RORB SLA/LP SLC37A4 SNRPA1 SPCS1 SRP72 THYN1 TNNT3 TOMM20 TPM3 TSEN2 ZNF330 ZNF496	GO:0005622.CC.intracellular	0	0	1
	GO:0005623	ABI1 ABI2 ACSL3 ACVR1B AKT1 ARHGAP21 ARHGEF4 ARMCX4 ARSD AS3MT ASCC3L1 ATP1B1 ATP2B2 ATP2B3 ATP6AP1 ATP6AP2 BICD1 BIRC4 C1QL1 C20orf108 CABIN1 CACNA2D2 CASK CDH22 CDKN1C CEP110 CEP350 CHRNA3 CHRNB4 CHST1 CLASP1 CLDN23 CMKOR1 CNOT2 COL13A1 COL9A3 COX4I2 CP110 CRLS1 CROP CRSP2 CSRP1 DDR1 DDX17 DERA DHRS4 DNAJC1 DUOX1 ELF4 FBXO4 FGD1 FGFR3 FMR1 FUS FZD10 GARNL1 GLI2 GLIS3 GNG8 GPD2 H2AFY HDAC6 HHAT …	ABCE1 AFF4 ALAS2 AMN ANAPC4 ANKRD11 AQP12A ARID1B ATP5I BATF BDKRB1 BHLHB3 BMPR1B BPI C15orf15 C18orf22 C4orf14 C4orf9 C6orf162 CA12 CACYBP CD36 CLNS1A COMMD8 COMT COX18 CREB5 CYP2D6 DLAT ENG EPHA8 ESRRB ETFDH F2R FAM38B FBXL18 FDX1 FXC1 GABRA5 GLP1R GPD1 GPR125 GPR180 GRPEL1 HBB HBQ1 HNRPD ICAM1 IL9R ITPR2 JTB KATNB1 KIAA0409 LOC127406 MGC13098 MKL1 NDFIP1 NFXL1 NR6A1 PAQR3 PARVA PDP2 PRDM4 PSMA…	GO:0005623.CC.cell	0	0	1
	GO:0005634	ABI1 ABI2 AKT1 ASCC3L1 CABIN1 CDKN1C CEP110 CEP350 CNOT2 CROP CRSP2 CSRP1 DDX17 DNAJC1 ELF4 FMR1 FUS GARNL1 GLI2 GLIS3 H2AFY HDAC6 HNRPM JMJD1A JMJD1C JMJD2B LZTS1 MEF2A MIER3 MKL2 MSH4 MYBL1 MYT1 NCOA1 NIPBL PARP9 POLA RANBP9 RBBP6 RBBP7 RBL1 RFX2 RIF1 RRAGB RTN4 SDCCAG1 SETBP1 SMG1 SRP54 STAG2 STK35 TFAP2E TOP2A TPX2 UBE2A UBE2B UNC84A USP11 USP7 UTX VGLL4 WDFY1 ZC3H7A ZNF224 ZNF75A ZXDC	AFF4 ANAPC4 ANKRD11 ARID1B BATF BHLHB3 C15orf15 C4orf9 CACYBP CLNS1A CREB5 ESRRB HNRPD KIAA0409 MGC13098 MKL1 NFXL1 NR6A1 PRDM4 PSMA1 PUS3 PWP1 RORB SLA/LP SNRPA1 THYN1 TSEN2 ZNF330 ZNF496	GO:0005634.CC.nucleus	0	0	1
	GO:0043170	ABI2 ACVR1B AKT1 APOL4 ASCC3L1 BICD1 C17orf27 CASK CFLAR CHST1 CLASP1 DDR1 DDX17 DKFZp761P0423 DNAJA4 DNAJC1 DPH5 EXOSC6 FBXO4 FGFR3 FMR1 GPD2 H2AFY HDAC6 HNRPM IGFBP4 JMJD1A JMJD1C JMJD2B LNPEP MAPK1 MGAT5 MSH4 MTMR3 MXRA5 PAN3 PARP9 PCTK1 PCTK2 PDK2 PDPK1 PHKA2 PJA1 POLA RBBP6 RBBP7 RRM2 SMG1 SOCS1 SRPK3 SSH1 STK35 TGFBR1 TOP2A TRIO TSPAN7 UBE2A UBE2B USP11 USP31 USP34 USP7 USP9X	ABCE1 ANAPC4 ARID1B BMPR1B C15orf15 C18orf22 C4orf9 CACYBP DLAT ELA3B EPHA8 F2R FBXL18 GPD1 GRPEL1 HNRPD KATNB1 LOC127406 LOC91316 MMP28 MPI NFXL1 PDP2 PGD POFUT2 PPID PSMA1 PUS3 RNF125 SCYE1 SLA/LP SLC37A4 SLC7A11 SNRPA1 SPCS1 SPN SRP72 TMPRSS11D TRHDE TSEN2 UBE2D3 VRK3	GO:0043170.BP.macromolecule metabolic process	0	0	1
	GO:0043283	ACVR1B AKT1 ASCC3L1 BICD1 C17orf27 CASK CHST1 DDR1 DDX17 DKFZp761P0423 DPH5 EXOSC6 FBXO4 FGFR3 FMR1 H2AFY HDAC6 HNRPM IGFBP4 JMJD1A JMJD1C JMJD2B MAPK1 MGAT5 MSH4 MTMR3 MXRA5 PAN3 PARP9 PCTK1 PCTK2 PDK2 PDPK1 PHKA2 PJA1 POLA RBBP6 RBBP7 RRM2 SMG1 SOCS1 SRPK3 SSH1 STK35 TGFBR1 TOP2A TRIO TSPAN7 UBE2A UBE2B USP11 USP31 USP34 USP7 USP9X	ANAPC4 ARID1B BMPR1B C18orf22 C4orf9 CACYBP EPHA8 F2R FBXL18 HNRPD NFXL1 PDP2 PSMA1 PUS3 RNF125 SCYE1 SLC37A4 SNRPA1 SPCS1 SRP72 TRHDE TSEN2 UBE2D3 VRK3	GO:0043283.BP.biopolymer metabolic process	0	0	1
	GO:0043226	ABI1 ABI2 ACSL3 AKT1 ARSD ASCC3L1 ATP6AP1 BICD1 CABIN1 CASK CDKN1C CEP110 CEP350 CHST1 CLASP1 CNOT2 COX4I2 CP110 CRLS1 CROP CRSP2 CSRP1 DDX17 DHRS4 DNAJC1 ELF4 FGD1 FMR1 FUS GARNL1 GLI2 GLIS3 GPD2 H2AFY HDAC6 HHAT HNRPM JMJD1A JMJD1C JMJD2B LAMP2 LZTS1 MEF2A MGAT5 MIER3 MKL2 MSH4 MYBL1 MYT1 NCOA1 NIPBL OCRL PARP9 PCYT1B PDK2 PGS1 PIK4CA PKP4 POLA PPP1R12A PXMP4 RANBP9 RBBP6 RBBP7 RBL1 RFX2 RIF1 R…	ABCE1 AFF4 ALAS2 ANAPC4 ANKRD11 ARID1B ATP5I BATF BDKRB1 BHLHB3 C15orf15 C18orf22 C4orf9 CACYBP CLNS1A COMMD8 COX18 CREB5 CYP2D6 DLAT ESRRB ETFDH F2R FDX1 FXC1 GRPEL1 HNRPD ITPR2 KATNB1 KIAA0409 LOC127406 MGC13098 MKL1 NFXL1 NR6A1 PARVA PDP2 PRDM4 PSMA1 PUS3 PWP1 RORB SLA/LP SLC37A4 SNRPA1 SPCS1 THYN1 TNNT3 TOMM20 TPM3 TSEN2 ZNF330 ZNF496	GO:0043226.CC.organelle	0	0	1
	GO:0043227	ABI1 ABI2 ACSL3 AKT1 ARSD ASCC3L1 ATP6AP1 CABIN1 CDKN1C CEP110 CEP350 CHST1 CLASP1 CNOT2 COX4I2 CRLS1 CROP CRSP2 CSRP1 DDX17 DHRS4 DNAJC1 ELF4 FGD1 FMR1 FUS GARNL1 GLI2 GLIS3 GPD2 H2AFY HDAC6 HHAT HNRPM JMJD1A JMJD1C JMJD2B LAMP2 LZTS1 MEF2A MGAT5 MIER3 MKL2 MSH4 MYBL1 MYT1 NCOA1 NIPBL OCRL PARP9 PCYT1B PDK2 PGS1 PIK4CA POLA PXMP4 RANBP9 RBBP6 RBBP7 RBL1 RFX2 RIF1 RRAGB RSN RTN4 SDCCAG1 SEC22C SE…	ABCE1 AFF4 ALAS2 ANAPC4 ANKRD11 ARID1B ATP5I BATF BDKRB1 BHLHB3 C15orf15 C18orf22 C4orf9 CACYBP CLNS1A COMMD8 COX18 CREB5 CYP2D6 DLAT ESRRB ETFDH F2R FDX1 FXC1 GRPEL1 HNRPD ITPR2 KIAA0409 MGC13098 MKL1 NFXL1 NR6A1 PDP2 PRDM4 PSMA1 PUS3 PWP1 RORB SLA/LP SLC37A4 SNRPA1 SPCS1 THYN1 TOMM20 TSEN2 ZNF330 ZNF496	GO:0043227.CC.membrane-bound organelle	0	0	1
	GO:0043229	ABI1 ABI2 ACSL3 AKT1 ARSD ASCC3L1 ATP6AP1 BICD1 CABIN1 CASK CDKN1C CEP110 CEP350 CHST1 CLASP1 CNOT2 COX4I2 CP110 CRLS1 CROP CRSP2 CSRP1 DDX17 DHRS4 DNAJC1 ELF4 FGD1 FMR1 FUS GARNL1 GLI2 GLIS3 GPD2 H2AFY HDAC6 HHAT HNRPM JMJD1A JMJD1C JMJD2B LAMP2 LZTS1 MEF2A MGAT5 MIER3 MKL2 MSH4 MYBL1 MYT1 NCOA1 NIPBL OCRL PARP9 PCYT1B PDK2 PGS1 PIK4CA PKP4 POLA PPP1R12A PXMP4 RANBP9 RBBP6 RBBP7 RBL1 RFX2 RIF1 R…	ABCE1 AFF4 ALAS2 ANAPC4 ANKRD11 ARID1B ATP5I BATF BDKRB1 BHLHB3 C15orf15 C18orf22 C4orf9 CACYBP CLNS1A COMMD8 COX18 CREB5 CYP2D6 DLAT ESRRB ETFDH F2R FDX1 FXC1 GRPEL1 HNRPD ITPR2 KATNB1 KIAA0409 LOC127406 MGC13098 MKL1 NFXL1 NR6A1 PARVA PDP2 PRDM4 PSMA1 PUS3 PWP1 RORB SLA/LP SLC37A4 SNRPA1 SPCS1 THYN1 TNNT3 TOMM20 TPM3 TSEN2 ZNF330 ZNF496	GO:0043229.CC.intracellular organelle	0	0	1
	GO:0050789	ABI1 AKT1 ARHGEF4 BIRC4 C10orf9 CARHSP1 CDKN1C CFLAR CLASP1 CNOT2 CRSP2 DNAJC1 ELF4 FGD1 GLI2 GLIS3 H2AFY HDAC6 HRBL IGFBP4 JMJD1A JMJD1C JMJD2B KCNH2 KCNQ1 LAMA5 LZTS1 MAPK1 MEF2A MIER3 MKL2 MYBL1 MYT1 NCOA1 PCTK1 PCTK2 PGF PPP1R12A PRKCBP1 PSD3 RASA2 RBBP7 RBL1 RFX2 RTN4 SLC20A1 SLC44A2 SOCS1 SOS2 TFAP2E TRIO VGLL4 ZNF224 ZNF75A	AFF4 ANAPC4 ARID1B BATF BHLHB3 BMPR1B CREB5 ESRRB F2R GLP1R HBB HNRPD KATNB1 MKL1 NDFIP1 NFXL1 NR6A1 PRDM4 RORB SIRPG SLA/LP SPN TNNT3 TPM3 ZNF496	GO:0050789.BP.regulation of biological process	0	0	1
	GO:0043231	ABI1 ABI2 ACSL3 AKT1 ARSD ASCC3L1 ATP6AP1 CABIN1 CDKN1C CEP110 CEP350 CHST1 CLASP1 CNOT2 COX4I2 CRLS1 CROP CRSP2 CSRP1 DDX17 DHRS4 DNAJC1 ELF4 FGD1 FMR1 FUS GARNL1 GLI2 GLIS3 GPD2 H2AFY HDAC6 HHAT HNRPM JMJD1A JMJD1C JMJD2B LAMP2 LZTS1 MEF2A MGAT5 MIER3 MKL2 MSH4 MYBL1 MYT1 NCOA1 NIPBL OCRL PARP9 PCYT1B PDK2 PGS1 PIK4CA POLA PXMP4 RANBP9 RBBP6 RBBP7 RBL1 RFX2 RIF1 RRAGB RSN RTN4 SDCCAG1 SEC22C SE…	ABCE1 AFF4 ALAS2 ANAPC4 ANKRD11 ARID1B ATP5I BATF BDKRB1 BHLHB3 C15orf15 C18orf22 C4orf9 CACYBP CLNS1A COMMD8 COX18 CREB5 CYP2D6 DLAT ESRRB ETFDH F2R FDX1 FXC1 GRPEL1 HNRPD ITPR2 KIAA0409 MGC13098 MKL1 NFXL1 NR6A1 PDP2 PRDM4 PSMA1 PUS3 PWP1 RORB SLA/LP SLC37A4 SNRPA1 SPCS1 THYN1 TOMM20 TSEN2 ZNF330 ZNF496	GO:0043231.CC.intracellular membrane-bound organelle	0	0	1
	GO:0050875	ABI1 ABI2 ACSL3 ACVR1B AKT1 APOL4 AS3MT ASCC3L1 ATP1B1 ATP2B2 ATP2B3 ATP6AP1 BICD1 BIRC4 C10orf9 C17orf27 C1QL1 CARHSP1 CASK CDKN1C CFLAR CHRNA3 CHRNB4 CHST1 CLASP1 CNOT2 COL13A1 COL9A3 COX4I2 CP110 CRLS1 CROP CRSP2 DDR1 DDX17 DERA DHRS4 DKFZp761P0423 DNAJA4 DNAJC1 DPH5 DUOX1 ELF4 EXOSC6 FBXO4 FGD1 FGFR3 FMR1 GLI2 GLIS3 GPD2 H2AFY HDAC6 HNRPM IGFBP4 JMJD1A JMJD1C JMJD2B KCNH2 KCNQ1 LAMA5 LNPEP LO…	ABCE1 AFF4 ALAS2 ANAPC4 AQP12A ARID1B ATP5I BATF BDKRB1 BHLHB3 BMPR1B C15orf15 C18orf22 C4orf9 CA12 CACYBP CD36 CLNS1A COMT COX18 CREB5 CYP2D6 DLAT ELA3B ENG EPHA8 ESRRB ETFDH F2R FBXL18 FDX1 FXC1 GABRA5 GLP1R GPD1 GRPEL1 HBB HBQ1 HNRPD IL9R ITPR2 KATNB1 LOC127406 MGC13098 MKL1 MMP28 MPI NFXL1 NR6A1 PDP2 PGD POFUT2 PPID PRDM4 PSMA1 PUS3 PWP1 RAB27B RNF125 RORB SCYE1 SIRPG SLA/LP SLC28A1 SLC37A4 S…	GO:0050875	0	0	1
	GO:0007582	ABI1 ABI2 ACSL3 ACVR1B AKT1 APOL4 ARSD AS3MT ASCC3L1 ATP1B1 ATP2B2 ATP2B3 ATP6AP1 BICD1 BIRC4 C10orf9 C17orf27 C1QL1 CARHSP1 CASK CDKN1C CFLAR CHRNA3 CHRNB4 CHST1 CLASP1 CNOT2 COL13A1 COL9A3 COX4I2 CP110 CRLS1 CROP CRSP2 DDR1 DDX17 DERA DHRS4 DKFZp761P0423 DNAJA4 DNAJC1 DPH5 DUOX1 ECHDC2 ELF4 EXOSC6 FBXO4 FGD1 FGFR3 FMR1 GLI2 GLIS3 GPD2 H2AFY HDAC6 HNRPM IGFBP4 IREB2 JMJD1A JMJD1C JMJD2B KCNH2 KC…	ABCE1 AFF4 ALAS2 ANAPC4 AQP12A ARID1B ATP5I BATF BDKRB1 BHLHB3 BMPR1B BPI C15orf15 C18orf22 C4orf9 CA12 CACYBP CD36 CECR7 CLNS1A COMT COX18 CREB5 CYP2D6 DLAT ELA3B ENG EPHA8 ESRRB ETFDH F2R FBXL18 FDX1 FXC1 GABRA5 GLP1R GPD1 GRPEL1 HBB HBQ1 HNRPD IL9R ITPR2 KATNB1 LOC127406 LOC91316 MGC13098 MKL1 MMP28 MPI NFXL1 NR6A1 PDP2 PGD PLA2G12A POFUT2 PPID PRDM4 PSMA1 PUS3 PWP1 RAB27B RAET1E RNF125 RORB R…	GO:0007582	0	0	1
	GO:0006139	ASCC3L1 ATP6AP1 BICD1 CARHSP1 CNOT2 CRSP2 DDX17 DERA DNAJC1 ELF4 EXOSC6 FMR1 GLI2 GLIS3 H2AFY HDAC6 HNRPM IGFBP4 JMJD1A JMJD1C JMJD2B KCNH2 LZTS1 MEF2A MIER3 MKL2 MSH4 MYBL1 MYT1 NCOA1 POLA PRKCBP1 RBBP7 RBL1 RFX2 RRM2 SMG1 TFAP2E TOP2A UBE2A UBE2B VGLL4 ZNF224 ZNF75A	AFF4 ARID1B ATP5I BATF BHLHB3 C18orf22 C4orf9 CREB5 ESRRB HNRPD MGC13098 MKL1 NFXL1 NR6A1 PGD PRDM4 PUS3 PWP1 RORB SCYE1 SLC28A1 SNRPA1 TSEN2 VRK3 ZNF496	GO:0006139.BP.nucleobase, nucleoside, nucleotide and nucleic acid metabolic process	0	0	1
	GO:0050794	ABI1 AKT1 ARHGEF4 BIRC4 C10orf9 CARHSP1 CDKN1C CFLAR CLASP1 CNOT2 CRSP2 DNAJC1 ELF4 FGD1 GLI2 GLIS3 HDAC6 IGFBP4 JMJD1A JMJD1C JMJD2B KCNH2 LAMA5 LZTS1 MAPK1 MEF2A MIER3 MKL2 MYBL1 MYT1 NCOA1 PCTK1 PCTK2 PGF PRKCBP1 PSD3 RASA2 RBBP7 RBL1 RFX2 RTN4 SLC20A1 SLC44A2 SOCS1 SOS2 TFAP2E TRIO VGLL4 ZNF224 ZNF75A	AFF4 ANAPC4 ARID1B BATF BHLHB3 BMPR1B CREB5 ESRRB F2R HNRPD KATNB1 MKL1 NDFIP1 NFXL1 NR6A1 PRDM4 RORB SIRPG SLA/LP SPN ZNF496	GO:0050794.BP.regulation of cellular process	0	0	23
	GO:0019538	ACVR1B AKT1 APOL4 ASCC3L1 C17orf27 CASK CFLAR CLASP1 DDR1 DKFZp761P0423 DNAJA4 DNAJC1 DPH5 FBXO4 FGFR3 H2AFY HDAC6 LNPEP MAPK1 MGAT5 MTMR3 MXRA5 PAN3 PARP9 PCTK1 PCTK2 PDK2 PDPK1 PHKA2 PJA1 RBBP6 SMG1 SOCS1 SRPK3 SSH1 STK35 TGFBR1 TRIO TSPAN7 UBE2A UBE2B USP11 USP31 USP34 USP7 USP9X	ABCE1 ANAPC4 BMPR1B C15orf15 CACYBP ELA3B EPHA8 F2R FBXL18 GRPEL1 KATNB1 LOC127406 MMP28 NFXL1 PDP2 PPID PSMA1 RNF125 SCYE1 SLA/LP SLC7A11 SPCS1 SPN SRP72 TMPRSS11D TRHDE UBE2D3 VRK3	GO:0019538.BP.protein metabolic process	0	0	24
	GO:0044422	ASCC3L1 CEP110 CHST1 CLASP1 COX4I2 CP110 CRSP2 DNAJC1 ELF4 FMR1 H2AFY HDAC6 HNRPM LAMP2 MGAT5 OCRL PIK4CA PXMP4 RIF1 RSN RTN4 TPX2	ANAPC4 ARID1B COMMD8 DLAT ETFDH FXC1 GRPEL1 HNRPD KATNB1 LOC127406 SNRPA1 SPCS1 TNNT3 TOMM20 TPM3 TSEN2 ZNF330	GO:0044422.CC.organelle part	0	0	25
	GO:0044446	ASCC3L1 CEP110 CHST1 CLASP1 COX4I2 CP110 CRSP2 DNAJC1 ELF4 FMR1 H2AFY HDAC6 HNRPM LAMP2 MGAT5 OCRL PIK4CA PXMP4 RIF1 RSN RTN4 TPX2	ANAPC4 ARID1B COMMD8 DLAT ETFDH FXC1 GRPEL1 HNRPD KATNB1 LOC127406 SNRPA1 SPCS1 TNNT3 TOMM20 TPM3 TSEN2 ZNF330	GO:0044446.CC.intracellular organelle part	0	0	25
	GO:0044267	ACVR1B AKT1 APOL4 C17orf27 CASK CFLAR CLASP1 DDR1 DKFZp761P0423 DNAJA4 DNAJC1 DPH5 FBXO4 FGFR3 HDAC6 LNPEP MAPK1 MGAT5 MTMR3 MXRA5 PAN3 PARP9 PCTK1 PCTK2 PDK2 PDPK1 PHKA2 PJA1 RBBP6 SMG1 SOCS1 SRPK3 SSH1 STK35 TGFBR1 TRIO TSPAN7 UBE2A UBE2B USP11 USP31 USP34 USP7 USP9X	ABCE1 ANAPC4 BMPR1B C15orf15 CACYBP ELA3B EPHA8 F2R FBXL18 GRPEL1 KATNB1 LOC127406 MMP28 NFXL1 PDP2 PPID PSMA1 RNF125 SCYE1 SLA/LP SPCS1 SPN SRP72 TMPRSS11D TRHDE UBE2D3 VRK3	GO:0044267.BP.cellular protein metabolic process	0	0	27
	GO:0044260	ABI2 ACVR1B AKT1 APOL4 C17orf27 CASK CFLAR CLASP1 DDR1 DKFZp761P0423 DNAJA4 DNAJC1 DPH5 FBXO4 FGFR3 HDAC6 LNPEP MAPK1 MGAT5 MTMR3 MXRA5 PAN3 PARP9 PCTK1 PCTK2 PDK2 PDPK1 PHKA2 PJA1 RBBP6 SMG1 SOCS1 SRPK3 SSH1 STK35 TGFBR1 TRIO TSPAN7 UBE2A UBE2B USP11 USP31 USP34 USP7 USP9X	ABCE1 ANAPC4 BMPR1B C15orf15 CACYBP ELA3B EPHA8 F2R FBXL18 GRPEL1 KATNB1 LOC127406 MMP28 NFXL1 PDP2 PPID PSMA1 RNF125 SCYE1 SLA/LP SLC37A4 SPCS1 SPN SRP72 TMPRSS11D TRHDE UBE2D3 VRK3	GO:0044260.BP.cellular macromolecule metabolic process	0	0	28
	GO:0005515	ABI1 ABI2 ABTB1 AKT1 ARHGAP21 ASCC3L1 ATP2B2 ATP2B3 BIRC4 BTBD3 C17orf27 CARHSP1 CASK CDH22 CDKN1C CFLAR CLASP1 CLDN23 CP110 CRSP2 CST3 DNAJA4 DNAJC1 ELF4 FGD1 FGFR3 FMR1 FUS GLI2 HDAC6 IGFBP4 ITGAV JMJD1C JMJD2B L1CAM LAMA5 MEF2A MKL2 MKRN1 MYT1 NCF1 NCOA1 NINJ1 NOS1 NRXN1 PGF PHKA2 PIK4CA PJA1 PKP4 PRKCBP1 RANBP9 RBBP6 RBBP7 RBL1 RSN RTN4 SMG1 SNTA1 SOCS1 SOS2 SPON2 SSH1 SYNE2 TPM4 USP7	ABCE1 ARID1B BATF CD36 COMT CREB5 DLAT ENG F2R FBXL18 GRPEL1 HBB ICAM1 IL9R KATNB1 KLHL17 KLHL18 MGC13098 MKL1 NFXL1 PARVA PGD PPID RAET1E RCHY1 RNF125 RORB SCYE1 SLA/LP SNRPA1 SPON1 TNNT3 TPM3 UBE2D3 ZNF330 ZNF496	GO:0005515.MF.protein binding	0	0	29
	GO:0003676	ABI2 ASCC3L1 CARHSP1 CROP DDX17 DNAJC1 ELF4 EXOSC6 FMR1 FUS GLI2 GLIS3 H2AFY HELLS HNRPM IREB2 JMJD2B LOC81691 LZTS1 MEF2A MIER3 MKL2 MKRN1 MSH4 MYBL1 MYT1 POLA RBBP6 RFX2 RSN SETBP1 SOS2 SRP54 TFAP2E TNRC6C TOP2A ZC3H7A ZNF224 ZNF75A ZXDC	AFF4 ARID1B BATF BHLHB3 CREB5 ESRRB HNRPD MGC13098 MKL1 NFXL1 NR6A1 PRDM4 PSMA1 PSPC1 RNF125 RORB SCYE1 SLA/LP SNRPA1 THAP6 ZNF496	GO:0003676.MF.nucleic acid binding	0	0	30
	GO:0000166	ACVR1B AKT1 ARL9 ASCC3L1 ATAD2 ATP2B2 ATP2B3 ATP6AP1 CASK DDR1 DDX17 DKFZp761P0423 DUOX1 FGFR3 FUS HELLS HHAT HNRPM LOC81691 MAPK1 MSH4 MXRA5 NAV2 NCF1 NOS1 PAN3 PCTK1 PCTK2 PDK2 PDPK1 POLA RRAGB SRP54 SRPK3 STK35 TGFBR1 TNRC6B TNRC6C TOP2A TPX2 TRIO	ABCE1 BMPR1B C4orf14 EPHA8 GRPEL1 HNRPD PSPC1 RAB27B VRK3	GO:0000166.MF.nucleotide binding	0	0	31
	GO:0003723	DDX17 EXOSC6 FMR1 FUS HNRPM IREB2 SRP54	HNRPD PSMA1 SCYE1 SLA/LP SNRPA1	GO:0003723.MF.RNA binding	0	0	32
	GO:0043234	ASCC3L1 ATP1B1 ATP6AP1 CHRNA3 CHRNB4 COX4I2 CRSP2 FBXO4 FMR1 GNG8 GPD2 H2AFY HDAC6 HNRPM ITGAV KCNH2 KCNQ1 LAMA5 PHKA2 RBBP6 SRP54	ANAPC4 ARID1B ATP5I BMPR1B C15orf15 DLAT FXC1 GPD1 HBB HBQ1 HNRPD KATNB1 LOC127406 PDP2 PSMA1 PSMD7 RAET1E RP3-377H14.5 SNRPA1 SPCS1 SRP72 TNNT3 TOMM20 TSEN2	GO:0043234.CC.protein complex	0	0	33
	GO:0030529	ASCC3L1 FMR1 HNRPM SRP54	C15orf15 HNRPD LOC127406 PSMA1 SNRPA1 SRP72	GO:0030529.CC.ribonucleoprotein complex	0	0	34
	GO:0044444	ABI1 ACSL3 ARSD AS3MT ATP6AP1 BIRC4 CEP110 CHST1 CLASP1 COX4I2 CP110 CRLS1 DHRS4 DNAJC1 FGD1 FMR1 GPD2 HHAT LAMP2 MGAT5 NCF1 OCRL PCYT1B PDK2 PGS1 PIK4CA PXMP4 RSN RTN4 SEC22C SEC61B SRP54 WDFY1	ABCE1 ALAS2 ATP5I BDKRB1 C15orf15 C18orf22 COMMD8 COX18 CYP2D6 DLAT ETFDH F2R FDX1 FXC1 GRPEL1 HBB HBQ1 ITPR2 KATNB1 LOC127406 PDP2 PSMA1 PSMD7 SLC37A4 SPCS1 SRP72 TNNT3 TOMM20 TPM3	GO:0044444.CC.cytoplasmic part	0	0	35
	GO:0050791	ABI1 AKT1 BIRC4 C10orf9 CARHSP1 CDKN1C CFLAR CLASP1 CNOT2 CRSP2 DNAJC1 ELF4 GLI2 GLIS3 HDAC6 IGFBP4 JMJD1A JMJD1C JMJD2B KCNH2 KCNQ1 LAMA5 LZTS1 MAPK1 MEF2A MIER3 MKL2 MYBL1 MYT1 NCOA1 PCTK1 PCTK2 PGF PPP1R12A PRKCBP1 RBBP7 RBL1 RFX2 RTN4 SOCS1 TFAP2E VGLL4 ZNF224 ZNF75A	AFF4 ANAPC4 ARID1B BATF BHLHB3 CREB5 ESRRB F2R HBB HNRPD KATNB1 MKL1 NFXL1 NR6A1 PRDM4 RORB SIRPG SLA/LP SPN TNNT3 TPM3 ZNF496	GO:0050791	0	0	36
	GO:0051244	ABI1 AKT1 BIRC4 C10orf9 CARHSP1 CDKN1C CFLAR CLASP1 CNOT2 CRSP2 DNAJC1 ELF4 GLI2 GLIS3 HDAC6 IGFBP4 JMJD1A JMJD1C JMJD2B KCNH2 LAMA5 LZTS1 MAPK1 MEF2A MIER3 MKL2 MYBL1 MYT1 NCOA1 PCTK1 PCTK2 PGF PRKCBP1 RBBP7 RBL1 RFX2 RTN4 SOCS1 TFAP2E VGLL4 ZNF224 ZNF75A	AFF4 ANAPC4 ARID1B BATF BHLHB3 CREB5 ESRRB F2R HNRPD KATNB1 MKL1 NFXL1 NR6A1 PRDM4 RORB SIRPG SLA/LP SPN ZNF496	GO:0051244	0	0	37
	GO:0043228	ABI1 ABI2 BICD1 CASK CEP110 CLASP1 CP110 FGD1 FMR1 H2AFY HDAC6 PKP4 PPP1R12A RIF1 RSN SNTA1 SSH1 SYNE2 TOP2A TPM4 TPX2	C15orf15 HNRPD KATNB1 LOC127406 PARVA TNNT3 TPM3 ZNF330	GO:0043228.CC.non-membrane-bound organelle	0	0	38
	GO:0043232	ABI1 ABI2 BICD1 CASK CEP110 CLASP1 CP110 FGD1 FMR1 H2AFY HDAC6 PKP4 PPP1R12A RIF1 RSN SNTA1 SSH1 SYNE2 TOP2A TPM4 TPX2	C15orf15 HNRPD KATNB1 LOC127406 PARVA TNNT3 TPM3 ZNF330	GO:0043232.CC.intracellular non-membrane-bound organelle	0	0	38
	GO:0016070	ASCC3L1 BICD1 DDX17 EXOSC6 FMR1 HNRPM SMG1	C18orf22 C4orf9 HNRPD PUS3 SCYE1 SNRPA1 TSEN2	GO:0016070.BP.RNA metabolic process	0	0	40
	GO:0043412	ACVR1B AKT1 C17orf27 CASK DDR1 DKFZp761P0423 DPH5 FBXO4 FGFR3 HDAC6 MAPK1 MGAT5 MTMR3 MXRA5 PAN3 PARP9 PCTK1 PCTK2 PDK2 PDPK1 PHKA2 PJA1 RBBP6 SMG1 SOCS1 SRPK3 SSH1 STK35 TGFBR1 TRIO TSPAN7 UBE2A UBE2B USP11 USP31 USP34 USP7 USP9X	ANAPC4 BMPR1B CACYBP EPHA8 F2R FBXL18 NFXL1 PDP2 PSMA1 RNF125 SPCS1 SRP72 TRHDE UBE2D3 VRK3	GO:0043412.BP.biopolymer modification	0	0	41
	GO:0006464	ACVR1B AKT1 C17orf27 CASK DDR1 DKFZp761P0423 DPH5 FBXO4 FGFR3 HDAC6 MAPK1 MGAT5 MTMR3 MXRA5 PAN3 PARP9 PCTK1 PCTK2 PDK2 PDPK1 PHKA2 PJA1 RBBP6 SMG1 SOCS1 SRPK3 SSH1 STK35 TGFBR1 TRIO TSPAN7 UBE2A UBE2B USP11 USP31 USP34 USP7 USP9X	ANAPC4 BMPR1B CACYBP EPHA8 F2R FBXL18 NFXL1 PDP2 PSMA1 RNF125 SPCS1 SRP72 TRHDE UBE2D3 VRK3	GO:0006464.BP.protein modification	0	0	42
	GO:0005739	COX4I2 CRLS1 DHRS4 GPD2 PDK2 PGS1	ABCE1 ALAS2 ATP5I C18orf22 COMMD8 COX18 DLAT ETFDH FDX1 FXC1 GRPEL1 PDP2 TOMM20	GO:0005739.CC.mitochondrion	0	0	43
	GO:0003824	ACSL3 ACVR1B AKT1 ARSD AS3MT ASCC3L1 ATAD2 ATP1B1 ATP2B2 ATP2B3 ATP6AP1 CASK CDKAL1 CFLAR CHST1 COX4I2 CRLS1 DDR1 DDX17 DERA DHRS4 DKFZp761P0423 DPH5 DUOX1 ECHDC2 EXOSC6 FBXO4 FGFR3 GNG8 GPD2 HDAC6 HELLS HHAT IREB2 JMJD1A JMJD1C JMJD2B KCNH2 LNPEP LOC220686 LOC81691 LOXL4 MAPK1 MGAT5 MGLL MPPED1 MTMR3 MXRA5 NAV2 NCF1 NCOA1 NOS1 OCRL PAN3 PARP9 PCTK1 PCTK2 PCYT1B PDK2 PDPK1 PGS1 PHKA2 PIK4CA PJA1 …	ABCE1 ALAS2 ANAPC4 ATP5I BMPR1B CA12 CECR7 COMT CYP2D6 DLAT ELA3B EPHA8 ETFDH FBXL18 FDX1 GPD1 HAGHL KATNB1 LOC91316 MGC13098 MMP28 MPI PDP2 PGD PLA2G12A POFUT2 PPID PSMA1 PUS3 RAB27B RNF125 SPCS1 SRP72 TMPRSS11D TRHDE TSEN2 UBE2D3 VRK3	GO:0003824.MF.catalytic activity	0	0	44
	GO:0031974	CRSP2 DNAJC1 ELF4 FMR1 HDAC6	ARID1B COMMD8 DLAT FXC1 GRPEL1 ZNF330	GO:0031974.CC.membrane-enclosed lumen	0	0	45
	GO:0043233	CRSP2 DNAJC1 ELF4 FMR1 HDAC6	ARID1B COMMD8 DLAT FXC1 GRPEL1 ZNF330	GO:0043233.CC.organelle lumen	0	0	45
	GO:0030695	ARHGEF4 FGD1 GARNL1 KIAA1219 PSD3 RASA2 SOS2 SRGAP2 STARD8 TRIO		GO:0030695.MF.GTPase regulator activity	0	0	47
	GO:0006996	ABI2 CLASP1 CP110 FGD1 H2AFY HDAC6 JMJD1A JMJD1C JMJD2B PDPK1 RANBP9 RBBP7 RIF1 SSH1	ARID1B C15orf15 C18orf22 C4orf9 FXC1 HNRPD KATNB1	GO:0006996.BP.organelle organization and biogenesis	0	0	48
	GO:0007049	C10orf9 CDKN1C CLASP1 CP110 HDAC6 LZTS1 MAPK1 MSH4 NIPBL PCTK1 PCTK2 PGF RBL1 RIF1 RSN STAG2 TPX2	ANAPC4 F2R KATNB1	GO:0007049.BP.cell cycle	0	0	49
	GO:0006350	CARHSP1 CNOT2 CRSP2 DNAJC1 ELF4 GLI2 GLIS3 HDAC6 JMJD1A JMJD1C JMJD2B KCNH2 LZTS1 MEF2A MIER3 MKL2 MYBL1 MYT1 NCOA1 PRKCBP1 RBBP7 RBL1 RFX2 TFAP2E VGLL4 ZNF224 ZNF75A	AFF4 ARID1B BATF BHLHB3 CREB5 ESRRB HNRPD MGC13098 MKL1 NFXL1 NR6A1 PRDM4 PWP1 RORB ZNF496	GO:0006350.BP.transcription	0	0	50
Analysis of Functional Annotation Gene Ontology results: CL versus CLX
The first 50 GO catergories that were enriched (adjusted P-value less than 0.05) are reported for the comparison between CL and CLX, along with the genes esponsible for the enrichment (B-statistics more than 1.1 corresponding to a probability of differential expression greater than 0.75).
GO2ALLPROBES_wCLsCLX: - Enriched Gene Sets - Bstat = 1.1 - Probability > 0.75
	IDs	Genes_UP_Regulated_in_wCLsCLX	Genes_DW_Regulated_in_wCLsCLX	Description	Pval	BH-Pval	Rank
	GO:0019538	AKT2 ARHGEF2 B3GALT1 CARS CASK CLASP1 DUSP10 EIF1 HECTD1 HSP90B1 HSPA4 HSPA8 HSPH1 PRKCI PTPN3 RBM14 SEPT11 SLC7A11 STK4 TAOK1 TRIM23 UBE1L2 USP33 USP9X WARS	DPP7 HMGB2 IMMP2L MMP14 NACA NEDD4L RNF5 VRK3 XPNPEP3	GO:0019538.BP.protein metabolic process	0	0	1
	GO:0009987	ACSL3 AFF4 AKT2 ARHGAP21 ARHGEF2 ASPM ATP1B1 B3GALT1 CARS CASC5 CASK CDH6 CLASP1 CNOT7 DPF3 DUSP10 DYNC2H1 EIF1 EPB41 ESCO2 FANCM FLJ25778 GAP43 GK GKP3 GRIA3 HECTD1 HMGCR HMGCS1 HNRPU HSP90B1 HSPA4 HSPA8 HSPH1 INCENP KIF5C KLF12 LPGAT1 MARCKS MCL1 NCBP1 NFE2L2 NFYA OSBPL8 PDE1C PIK3C2A PIK3R3 PRKCI PTPN3 RAB6A RAP2A RAP2B RBM14 RIF1 RSN SAMHD1 SEC22C SEPT11 SESN2 SETX SFRS10 SHOX2 SLC1A2 SLC7A11…	AFTPH ALAS2 ANXA13 ASB13 ATP5C1 CCL18 CHES1 COL3A1 COX6A1 CYGB DIDO1 DPP7 ENG HBB HBE1 HMGB2 IMMP2L KRAS LGALS1 MLLT6 MMP14 NACA NEDD4L NR4A1 OVGP1 PHF15 PIP5K2B PITPNB RNF5 ROBO1 SORCS3 TMF1 VRK3 XPNPEP3 ZNF331 ZNF564 ZNF80	GO:0009987.BP.cellular process	0	0	1
	GO:0044464	ACAT2 ACSL3 AFF4 ARHGAP21 ARHGEF2 ASPM ATP1B1 B3GALT1 CARS CASC5 CASK CDH6 CLASP1 CNOT7 DDEF1 DHX9 DPF3 DUSP10 DYNC2H1 EIF1 EPB41 ESCO2 FANCM FLJ25778 GALNT10 GAP43 GK GKP3 GRIA3 HECTD1 HMGCR HMGCS1 HNRPU HSP90B1 HSPA4 HSPA8 HSPH1 IFI44 INCENP KIAA0286 KIF5C KLF12 LPGAT1 MARCKS MATR3 MCL1 MFAP3 NCBP1 NFE2L2 NFYA PIK3C2A PIK3R3 PRKCI PTPN3 RAB6A RAP2A RAP2B RBM14 RIF1 RSN SAMHD1 SEC22C SEPT11 SESN…	AFTPH ALAS2 ANXA13 ASAHL ATP5C1 CHES1 COL3A1 COX6A1 CYGB DIDO1 DPP7 ENG FLJ21865 GLIPR1 HBB HBE1 HMGB2 IMMP2L KRAS LGALS1 LOC440895 MLLT6 MMP14 NACA NEDD4L NR4A1 PIP5K2B PITPNB RAET1E RHBDL3 RNF5 ROBO1 SORCS3 TNNT3 ZNF331 ZNF564 ZNF80	GO:0044464.CC.cell part	0	0	1
	GO:0044424	ACAT2 ACSL3 AFF4 ARHGEF2 ASPM CARS CASC5 CASK CLASP1 CNOT7 DHX9 DPF3 DUSP10 DYNC2H1 EIF1 EPB41 ESCO2 FANCM FLJ25778 GK GKP3 HMGCR HMGCS1 HNRPU HSP90B1 HSPA4 HSPA8 HSPH1 IFI44 INCENP KIF5C KLF12 LPGAT1 MARCKS MATR3 MCL1 NCBP1 NFE2L2 NFYA PIK3C2A PIK3R3 PRKCI PTPN3 RAB6A RBM14 RIF1 RSN SEC22C SEPT11 SESN2 SETX SFRS10 SHOX2 SMAD5 STIP1 STK4 SUV39H2 TPR TRIM23 USP33 WARS WDFY1 ZFR ZNF192 ZNF37A ZNF43…	AFTPH ALAS2 ASAHL ATP5C1 CHES1 COL3A1 COX6A1 CYGB DIDO1 DPP7 HBB HBE1 HMGB2 LGALS1 LOC440895 MLLT6 NACA NR4A1 PIP5K2B TNNT3 ZNF331 ZNF564 ZNF80	GO:0044424.CC.intracellular part	0	0	1
	GO:0044260	ACAT2 ACSL3 AFF4 AKT2 ARHGAP21 ARHGEF2 ASPM ATP1B1 B3GALT1 CARS CASC5 CASK CDH6 CENPI CLASP1 CNOT7 DDEF1 DPF3 DUSP10 DYNC2H1 EIF1 EPB41 ESCO2 FANCM FLJ25778 GAP43 GK GKP3 GRIA3 HECTD1 HMGCR HMGCS1 HNRPU HSP90B1 HSPA4 HSPA8 HSPH1 IFI44 INCENP KIAA0286 KIF5C KLF12 LPGAT1 MANEA MARCKS MCL1 NCBP1 NFE2L2 NFYA OSBPL8 PDE1C PIK3C2A PIK3R3 PRKCI PTPN3 RAB6A RAP2A RAP2B RBM14 RIF1 RSN SAMHD1 SEC22C SEPT11…	AFTPH ALAS2 ANXA13 ASAHL ASB13 ATP5C1 CCL18 CHES1 COL3A1 COX6A1 CYGB DEFB106A DIDO1 DPP7 ENG FLJ21865 HBB HBE1 HMGB2 IMMP2L KRAS LGALS1 MLLT6 MMP14 NACA NEDD4L NR4A1 OVGP1 PHF15 PIP5K2B PITPNB RAET1E RNF5 ROBO1 SORCS3 TMF1 TNNT3 VRK3 XPNPEP3 ZNF331 ZNF564 ZNF80	GO:0044260.BP.cellular macromolecule metabolic process	0	0	1
	GO:0044267	AKT2 ARHGEF2 B3GALT1 CARS CASK CLASP1 DUSP10 EIF1 HECTD1 HSP90B1 HSPA4 HSPA8 HSPH1 PRKCI PTPN3 RBM14 STK4 TAOK1 TRIM23 UBE1L2 USP33 USP9X WARS	DPP7 IMMP2L MMP14 NACA NEDD4L RNF5 VRK3 XPNPEP3	GO:0044267.BP.cellular protein metabolic process	0	0	1
	GO:0008150	ACAT2 ACSL3 AFF4 AKT2 ARHGAP21 ARHGEF2 ASPM ATP1B1 B3GALT1 CARS CASC5 CASK CDH6 CENPI CLASP1 CNOT7 DDEF1 DPF3 DUSP10 DYNC2H1 EIF1 EPB41 ESCO2 FANCM FLJ25778 GAP43 GK GKP3 GRIA3 HECTD1 HMGCR HMGCS1 HNRPU HSP90B1 HSPA4 HSPA8 HSPH1 IFI44 INCENP KIAA0286 KIF5C KLF12 LPGAT1 MANEA MARCKS MCL1 NCBP1 NFE2L2 NFYA OSBPL8 PDE1C PIK3C2A PIK3R3 PRKCI PTPN3 RAB6A RAP2A RAP2B RBM14 RIF1 RSN SAMHD1 SEC22C SEPT11…	AFTPH ALAS2 ANXA13 ASAHL ASB13 ATP5C1 CCL18 CHES1 COL3A1 COX6A1 CYGB DEFB106A DIDO1 DPP7 ENG FLJ21865 HBB HBE1 HMGB2 IMMP2L KRAS LGALS1 MLLT6 MMP14 NACA NEDD4L NR4A1 OVGP1 PHF15 PIP5K2B PITPNB RAET1E RNF5 ROBO1 SORCS3 TMF1 TNNT3 VRK3 XPNPEP3 ZNF331 ZNF564 ZNF80	GO:0008150.BP.biological_process	0	0	1
	GO:0008152	ACAT2 ACSL3 AFF4 AKT2 ARHGEF2 B3GALT1 CARS CASK CLASP1 CNOT7 DPF3 DUSP10 EIF1 FANCM GK GKP3 HECTD1 HMGCR HMGCS1 HNRPU HSP90B1 HSPA4 HSPA8 HSPH1 KLF12 LPGAT1 MANEA NCBP1 NFE2L2 NFYA OSBPL8 PIK3C2A PRKCI PTPN3 RBM14 SEPT11 SFRS10 SHOX2 SLC7A11 SMAD5 SQLE STK4 SUV39H2 TAOK1 TRIM23 TRUB1 UBE1L2 USP33 USP9X WARS ZNF192 ZNF37A ZNF434	ALAS2 ATP5C1 CHES1 COX6A1 DIDO1 DPP7 FLJ21865 HBB HMGB2 IMMP2L MLLT6 MMP14 NACA NEDD4L NR4A1 OVGP1 PHF15 PITPNB RNF5 TMF1 VRK3 XPNPEP3 ZNF331 ZNF564 ZNF80	GO:0008152.BP.metabolic process	0	0	1
	GO:0044237	ACSL3 AFF4 AKT2 ARHGEF2 B3GALT1 CARS CASK CLASP1 CNOT7 DPF3 DUSP10 EIF1 FANCM GK GKP3 HECTD1 HMGCR HMGCS1 HNRPU HSP90B1 HSPA4 HSPA8 HSPH1 KLF12 LPGAT1 NCBP1 NFE2L2 NFYA OSBPL8 PIK3C2A PRKCI PTPN3 RBM14 SFRS10 SHOX2 SMAD5 SQLE STK4 SUV39H2 TAOK1 TRIM23 TRUB1 UBE1L2 USP33 USP9X WARS ZNF192 ZNF37A ZNF434	ALAS2 ATP5C1 CHES1 COX6A1 DIDO1 DPP7 HMGB2 IMMP2L MLLT6 MMP14 NACA NEDD4L NR4A1 OVGP1 PHF15 RNF5 TMF1 VRK3 XPNPEP3 ZNF331 ZNF564 ZNF80	GO:0044237.BP.cellular metabolic process	0	0	1
	GO:0044238	ACAT2 ACSL3 AFF4 AKT2 ARHGEF2 B3GALT1 CARS CASK CLASP1 CNOT7 DPF3 DUSP10 EIF1 FANCM GK GKP3 HECTD1 HMGCR HMGCS1 HNRPU HSP90B1 HSPA4 HSPA8 HSPH1 KLF12 LPGAT1 MANEA NCBP1 NFE2L2 NFYA OSBPL8 PIK3C2A PRKCI PTPN3 RBM14 SEPT11 SFRS10 SHOX2 SLC7A11 SMAD5 SQLE STK4 SUV39H2 TAOK1 TRIM23 TRUB1 UBE1L2 USP33 USP9X WARS ZNF192 ZNF37A ZNF434	ATP5C1 CHES1 DIDO1 DPP7 FLJ21865 HMGB2 IMMP2L MLLT6 MMP14 NACA NEDD4L NR4A1 OVGP1 PHF15 PITPNB RNF5 TMF1 VRK3 XPNPEP3 ZNF331 ZNF564 ZNF80	GO:0044238.BP.primary metabolic process	0	0	1
	GO:0005488	ACSL3 AFF4 AKT2 ARHGAP21 ARHGEF2 ASPM ATP1B1 B3GALT1 CARS CASC5 CASK CDH6 CHAC1 CLASP1 CNOT7 DDEF1 DHX9 DPF3 DYNC2H1 EIF1 EPB41 ESCO2 FANCM GALNT10 GAP43 GK GKP3 HECTD1 HNRPU HSP90B1 HSPA4 HSPA8 HSPH1 INCENP KIAA1033 KIF5C KLF12 MANEA MARCKS MATR3 MCL1 NCBP1 NFE2L2 NFYA PDE1C PIK3C2A PIK3R3 PRKCI PTPN3 RAB6A RAP2A RAP2B RBM14 RIF1 RNF146 RSN SEPT11 SETX SFRS10 SHOX2 SMAD5 STIP1 STK4 SUV39H2 TAOK1…	AFTPH ANXA13 ASB13 ATP5C1 CCL18 CHES1 CYGB DIDO1 DPP7 ENG HBB HBE1 HMGB2 KRAS LGALS1 LOC440895 MBNL2 MLLT6 MMP14 NACA NEDD4L NR4A1 OVGP1 PHF15 PITPNB RAET1E RHBDL3 RNF5 ROBO1 SORCS3 TMF1 TNNT3 TNRC15 VRK3 ZNF331 ZNF564 ZNF80	GO:0005488.MF.binding	0	0	1
	GO:0003674	ACAT2 ACSL3 AFF4 AKT2 ARHGAP21 ARHGEF2 ASPM ATP1B1 B3GALT1 CARS CASC5 CASK CDH6 CHAC1 CLASP1 CNOT7 DDEF1 DHX9 DPF3 DUSP10 DYNC2H1 EIF1 EPB41 ESCO2 FANCM FLJ25778 GALNT10 GAP43 GK GKP3 GRIA3 HECTD1 HMGCR HMGCS1 HNRPU HSP90B1 HSPA4 HSPA8 HSPH1 INCENP KIAA0286 KIAA1033 KIF5C KLF12 LPGAT1 MANEA MARCKS MATR3 MCL1 MFAP3 NCBP1 NFE2L2 NFYA PDE1C PIK3C2A PIK3R3 PRKCI PTPN3 RAB6A RAP2A RAP2B RBM14 RIF1 RNF…	AFTPH ALAS2 ANXA13 ASAHL ASB13 ATP5C1 CCL18 CHES1 COL3A1 COX6A1 CYGB DIDO1 DPP7 ENG FLJ21865 GARNL3 HBB HBE1 HMGB2 IMMP2L KRAS LGALS1 LOC440895 MBNL2 MLLT6 MMP14 NACA NEDD4L NR4A1 OVGP1 PHF15 PIP5K2B PITPNB RAET1E RHBDL3 RNF5 ROBO1 SORCS3 TMF1 TNNT3 TNRC15 VRK3 XPNPEP3 ZNF331 ZNF564 ZNF80	GO:0003674.MF.molecular_function	0	0	1
	GO:0000166	AKT2 CARS CASK DHX9 DYNC2H1 FANCM GK GKP3 HNRPU HSP90B1 HSPA4 HSPA8 HSPH1 KIF5C MATR3 PRKCI RAB6A RAP2A RAP2B RBM14 SEPT11 SETX SFRS10 STK4 TAOK1 TRIM23 WARS	KRAS VRK3	GO:0000166.MF.nucleotide binding	0	0	1
	GO:0005622	ACAT2 ACSL3 AFF4 ARHGAP21 ARHGEF2 ASPM CARS CASC5 CASK CLASP1 CNOT7 DHX9 DPF3 DUSP10 DYNC2H1 EIF1 EPB41 ESCO2 FANCM FLJ25778 GK GKP3 HECTD1 HMGCR HMGCS1 HNRPU HSP90B1 HSPA4 HSPA8 HSPH1 IFI44 INCENP KIF5C KLF12 LPGAT1 MARCKS MATR3 MCL1 NCBP1 NFE2L2 NFYA PIK3C2A PIK3R3 PRKCI PTPN3 RAB6A RAP2A RAP2B RBM14 RIF1 RSN SAMHD1 SEC22C SEPT11 SESN2 SETX SFRS10 SHOX2 SMAD5 STIP1 STK4 SUV39H2 TPR TRIM23 USP33…	AFTPH ALAS2 ASAHL ATP5C1 CHES1 COL3A1 COX6A1 CYGB DIDO1 DPP7 FLJ21865 HBB HBE1 HMGB2 KRAS LGALS1 LOC440895 MLLT6 NACA NEDD4L NR4A1 PIP5K2B PITPNB TNNT3 ZNF331 ZNF564 ZNF80	GO:0005622.CC.intracellular	0	0	1
	GO:0005623	ACAT2 ACSL3 AFF4 ARHGAP21 ARHGEF2 ASPM ATP1B1 B3GALT1 CARS CASC5 CASK CDH6 CLASP1 CNOT7 DDEF1 DHX9 DPF3 DUSP10 DYNC2H1 EIF1 EPB41 ESCO2 FANCM FLJ25778 GALNT10 GAP43 GK GKP3 GRIA3 HECTD1 HMGCR HMGCS1 HNRPU HSP90B1 HSPA4 HSPA8 HSPH1 IFI44 INCENP KIAA0286 KIF5C KLF12 LPGAT1 MARCKS MATR3 MCL1 MFAP3 NCBP1 NFE2L2 NFYA PIK3C2A PIK3R3 PRKCI PTPN3 RAB6A RAP2A RAP2B RBM14 RIF1 RSN SAMHD1 SEC22C SEPT11 SESN…	AFTPH ALAS2 ANXA13 ASAHL ATP5C1 CHES1 COL3A1 COX6A1 CYGB DIDO1 DPP7 ENG FLJ21865 GLIPR1 HBB HBE1 HMGB2 IMMP2L KRAS LGALS1 LOC440895 MLLT6 MMP14 NACA NEDD4L NR4A1 PIP5K2B PITPNB RAET1E RHBDL3 RNF5 ROBO1 SORCS3 TNNT3 ZNF331 ZNF564 ZNF80	GO:0005623.CC.cell	0	0	1
	GO:0043412	AKT2 B3GALT1 CASK DUSP10 HECTD1 PRKCI PTPN3 RBM14 STK4 TAOK1 TRIM23 UBE1L2 USP33 USP9X	NEDD4L RNF5 VRK3	GO:0043412.BP.biopolymer modification	0	0	1
	GO:0043170	AKT2 ARHGEF2 B3GALT1 CARS CASK CLASP1 CNOT7 DUSP10 EIF1 FANCM GK GKP3 HECTD1 HNRPU HSP90B1 HSPA4 HSPA8 HSPH1 MANEA NCBP1 PRKCI PTPN3 RBM14 SEPT11 SFRS10 SLC7A11 STK4 SUV39H2 TAOK1 TRIM23 TRUB1 UBE1L2 USP33 USP9X WARS	DPP7 FLJ21865 HMGB2 IMMP2L MMP14 NACA NEDD4L OVGP1 RNF5 VRK3 XPNPEP3	GO:0043170.BP.macromolecule metabolic process	0	0	1
	GO:0043283	AKT2 B3GALT1 CARS CASK DUSP10 FANCM HECTD1 HNRPU NCBP1 PRKCI PTPN3 RBM14 SFRS10 STK4 SUV39H2 TAOK1 TRIM23 TRUB1 UBE1L2 USP33 USP9X WARS	HMGB2 NEDD4L OVGP1 RNF5 VRK3	GO:0043283.BP.biopolymer metabolic process	0	0	1
	GO:0043226	ACSL3 AFF4 ARHGEF2 ASPM CASC5 CASK CLASP1 CNOT7 DHX9 DPF3 DUSP10 DYNC2H1 EPB41 ESCO2 FANCM FLJ25778 GK GKP3 HMGCR HNRPU HSP90B1 HSPA8 INCENP KIF5C KLF12 LPGAT1 MARCKS MATR3 MCL1 NCBP1 NFE2L2 NFYA PIK3C2A PRKCI PTPN3 RAB6A RBM14 RIF1 RSN SEC22C SEPT11 SESN2 SETX SFRS10 SHOX2 SMAD5 STIP1 STK4 SUV39H2 TPR TRIM23 WDFY1 ZFR ZNF192 ZNF37A ZNF434 ZNF770 ZWILCH ZXDC	AFTPH ALAS2 ASAHL ATP5C1 CHES1 COX6A1 DIDO1 DPP7 HMGB2 LOC440895 MLLT6 NACA NR4A1 PIP5K2B TNNT3 ZNF331 ZNF564 ZNF80	GO:0043226.CC.organelle	0	0	1
	GO:0043229	ACSL3 AFF4 ARHGEF2 ASPM CASC5 CASK CLASP1 CNOT7 DHX9 DPF3 DUSP10 DYNC2H1 EPB41 ESCO2 FANCM FLJ25778 GK GKP3 HMGCR HNRPU HSP90B1 HSPA8 INCENP KIF5C KLF12 LPGAT1 MARCKS MATR3 MCL1 NCBP1 NFE2L2 NFYA PIK3C2A PRKCI PTPN3 RAB6A RBM14 RIF1 RSN SEC22C SEPT11 SESN2 SETX SFRS10 SHOX2 SMAD5 STIP1 STK4 SUV39H2 TPR TRIM23 WDFY1 ZFR ZNF192 ZNF37A ZNF434 ZNF770 ZWILCH ZXDC	AFTPH ALAS2 ASAHL ATP5C1 CHES1 COX6A1 DIDO1 DPP7 HMGB2 LOC440895 MLLT6 NACA NR4A1 PIP5K2B TNNT3 ZNF331 ZNF564 ZNF80	GO:0043229.CC.intracellular organelle	0	0	1
	GO:0050875	ACSL3 AFF4 AKT2 ARHGEF2 ASPM ATP1B1 B3GALT1 CARS CASK CLASP1 CNOT7 DPF3 DUSP10 DYNC2H1 EIF1 EPB41 ESCO2 FANCM FLJ25778 GAP43 GK GKP3 GRIA3 HECTD1 HMGCR HMGCS1 HNRPU HSP90B1 HSPA4 HSPA8 HSPH1 INCENP KIF5C KLF12 LPGAT1 MARCKS MCL1 NCBP1 NFE2L2 NFYA OSBPL8 PIK3C2A PRKCI PTPN3 RAB6A RBM14 RIF1 RSN SEC22C SEPT11 SESN2 SETX SFRS10 SHOX2 SLC1A2 SLC7A11 SMAD5 SOCS4 SQLE STK4 SUV39H2 TAOK1 TPR TRIM23 TRUB…	AFTPH ALAS2 ATP5C1 CHES1 COL3A1 COX6A1 CYGB DIDO1 DPP7 ENG HBB HBE1 HMGB2 IMMP2L KRAS LGALS1 MLLT6 MMP14 NACA NEDD4L NR4A1 OVGP1 PHF15 PITPNB RNF5 ROBO1 SORCS3 TMF1 VRK3 XPNPEP3 ZNF331 ZNF564 ZNF80	GO:0050875	0	0	1
	GO:0007582	ACAT2 ACSL3 AFF4 AKT2 ARHGEF2 ASPM ATP1B1 B3GALT1 CARS CASK CLASP1 CNOT7 DPF3 DUSP10 DYNC2H1 EIF1 EPB41 ESCO2 FANCM FLJ25778 GAP43 GK GKP3 GRIA3 HECTD1 HMGCR HMGCS1 HNRPU HSP90B1 HSPA4 HSPA8 HSPH1 INCENP KIF5C KLF12 LPGAT1 MANEA MARCKS MCL1 NCBP1 NFE2L2 NFYA OSBPL8 PIK3C2A PRKCI PTPN3 RAB6A RBM14 RIF1 RSN SAMHD1 SEC22C SEPT11 SESN2 SETX SFRS10 SHOX2 SLC1A2 SLC7A11 SMAD5 SOCS4 SQLE STK4 SUV39H2 TA…	AFTPH ALAS2 ATP5C1 CCL18 CHES1 COL3A1 COX6A1 CYGB DIDO1 DPP7 ENG FLJ21865 HBB HBE1 HMGB2 IMMP2L KRAS LGALS1 MLLT6 MMP14 NACA NEDD4L NR4A1 OVGP1 PHF15 PITPNB RAET1E RNF5 ROBO1 SORCS3 TMF1 TNNT3 VRK3 XPNPEP3 ZNF331 ZNF564 ZNF80	GO:0007582	0	0	1
	GO:0006464	AKT2 B3GALT1 CASK DUSP10 HECTD1 PRKCI PTPN3 RBM14 STK4 TAOK1 TRIM23 UBE1L2 USP33 USP9X	NEDD4L RNF5 VRK3	GO:0006464.BP.protein modification	0	0	1
	GO:0017076	AKT2 CARS CASK DHX9 DYNC2H1 FANCM GK GKP3 HNRPU HSP90B1 HSPA4 HSPA8 HSPH1 KIF5C PRKCI RAB6A RAP2A RAP2B SEPT11 SETX STK4 TAOK1 TRIM23 WARS	KRAS VRK3	GO:0017076.MF.purine nucleotide binding	0	0	25
	GO:0043227	ACSL3 AFF4 ASPM CASC5 CLASP1 CNOT7 DHX9 DPF3 DUSP10 DYNC2H1 EPB41 ESCO2 FANCM GK GKP3 HMGCR HNRPU HSP90B1 HSPA8 INCENP KLF12 LPGAT1 MATR3 MCL1 NCBP1 NFE2L2 NFYA PIK3C2A PRKCI RAB6A RBM14 RIF1 RSN SEC22C SESN2 SETX SFRS10 SHOX2 SMAD5 STIP1 STK4 SUV39H2 TPR TRIM23 WDFY1 ZFR ZNF192 ZNF37A ZNF434 ZNF770 ZXDC	AFTPH ALAS2 ASAHL ATP5C1 CHES1 COX6A1 DIDO1 DPP7 HMGB2 LOC440895 MLLT6 NACA NR4A1 PIP5K2B ZNF331 ZNF564 ZNF80	GO:0043227.CC.membrane-bound organelle	0	0	25
	GO:0043231	ACSL3 AFF4 ASPM CASC5 CLASP1 CNOT7 DHX9 DPF3 DUSP10 DYNC2H1 EPB41 ESCO2 FANCM GK GKP3 HMGCR HNRPU HSP90B1 HSPA8 INCENP KLF12 LPGAT1 MATR3 MCL1 NCBP1 NFE2L2 NFYA PIK3C2A PRKCI RAB6A RBM14 RIF1 RSN SEC22C SESN2 SETX SFRS10 SHOX2 SMAD5 STIP1 STK4 SUV39H2 TPR TRIM23 WDFY1 ZFR ZNF192 ZNF37A ZNF434 ZNF770 ZXDC	AFTPH ALAS2 ASAHL ATP5C1 CHES1 COX6A1 DIDO1 DPP7 HMGB2 LOC440895 MLLT6 NACA NR4A1 PIP5K2B ZNF331 ZNF564 ZNF80	GO:0043231.CC.intracellular membrane-bound organelle	0	0	25
	GO:0050789	AFF4 ARHGEF2 CLASP1 CNOT7 DDEF1 DPF3 EIF1 GAP43 HSP90B1 KLF12 MCL1 NCBP1 NFE2L2 NFYA RBM14 SESN2 SHOX2 SMAD5 SOCS4 STK4 WARS ZNF192 ZNF37A ZNF434	CHES1 DIDO1 HBB HMGB2 KRAS LGALS1 MLLT6 NEDD4L NR4A1 PHF15 ROBO1 TMF1 TNNT3 ZNF331 ZNF564 ZNF80	GO:0050789.BP.regulation of biological process	0	0	28
	GO:0005634	AFF4 ASPM CASC5 CNOT7 DHX9 DPF3 DUSP10 EPB41 ESCO2 FANCM HNRPU HSPA8 INCENP KLF12 MATR3 MCL1 NCBP1 NFE2L2 NFYA PIK3C2A PRKCI RBM14 RIF1 SESN2 SETX SFRS10 SHOX2 SMAD5 STIP1 STK4 SUV39H2 TPR WDFY1 ZFR ZNF192 ZNF37A ZNF434 ZNF770 ZXDC	CHES1 DIDO1 HMGB2 MLLT6 NACA NR4A1 ZNF331 ZNF564 ZNF80	GO:0005634.CC.nucleus	0	0	29
	GO:0050794	AFF4 ARHGEF2 CLASP1 CNOT7 DPF3 EIF1 GAP43 HSP90B1 KLF12 MCL1 NCBP1 NFE2L2 NFYA RBM14 SESN2 SHOX2 SMAD5 SOCS4 STK4 WARS ZNF192 ZNF37A ZNF434	CHES1 DIDO1 HMGB2 KRAS LGALS1 MLLT6 NEDD4L NR4A1 PHF15 TMF1 ZNF331 ZNF564 ZNF80	GO:0050794.BP.regulation of cellular process	0	0	30
	GO:0005524	AKT2 CARS CASK DHX9 DYNC2H1 FANCM GK GKP3 HNRPU HSP90B1 HSPA4 HSPA8 HSPH1 KIF5C PRKCI SETX STK4 TAOK1 WARS	VRK3	GO:0005524.MF.ATP binding	0	0	31
	GO:0005515	AKT2 ARHGAP21 ARHGEF2 ASPM CASC5 CASK CDH6 CHAC1 CLASP1 CNOT7 DDEF1 DHX9 EPB41 GAP43 HSP90B1 HSPA8 INCENP KIF5C KLF12 MARCKS MCL1 NCBP1 NFE2L2 NFYA PDE1C PIK3C2A PIK3R3 PRKCI PTPN3 RAB6A RBM14 RNF146 RSN SEPT11 STK4 TRIM23 USP33 ZNF192	AFTPH ASB13 CCL18 CHES1 DIDO1 DPP7 ENG HBB KRAS MLLT6 MMP14 NEDD4L PHF15 RAET1E RNF5 ROBO1 TMF1 TNNT3 TNRC15	GO:0005515.MF.protein binding	0	0	32
	GO:0030554	AKT2 CARS CASK DHX9 DYNC2H1 FANCM GK GKP3 HNRPU HSP90B1 HSPA4 HSPA8 HSPH1 KIF5C PRKCI SETX STK4 TAOK1 WARS	VRK3	GO:0030554.MF.adenyl nucleotide binding	0	0	33
	GO:0003824	ACAT2 ACSL3 AKT2 ATP1B1 B3GALT1 CARS CASK DHX9 DUSP10 DYNC2H1 ESCO2 FANCM GALNT10 GK GKP3 HECTD1 HMGCR HMGCS1 HSPA8 LPGAT1 MANEA PDE1C PIK3C2A PIK3R3 PRKCI PTPN3 RAB6A RAP2A SAMHD1 SETX SQLE STK4 SUV39H2 TAOK1 TRIM23 TRUB1 UBE1L2 USP33 USP9X WARS	ALAS2 ASAHL ATP5C1 COX6A1 DPP7 FLJ21865 IMMP2L KRAS MMP14 NEDD4L OVGP1 PIP5K2B RHBDL3 RNF5 VRK3 XPNPEP3	GO:0003824.MF.catalytic activity	0	0	34
	GO:0004674	AKT2 CASK PRKCI STK4 TAOK1	VRK3	GO:0004674.MF.protein serine/threonine kinase activity	0	0	35
	GO:0051244	AFF4 ARHGEF2 CLASP1 CNOT7 DPF3 EIF1 GAP43 HSP90B1 KLF12 MCL1 NCBP1 NFE2L2 NFYA RBM14 SESN2 SHOX2 SMAD5 SOCS4 STK4 WARS ZNF192 ZNF37A ZNF434	CHES1 DIDO1 HMGB2 KRAS LGALS1 MLLT6 NEDD4L NR4A1 PHF15 TMF1 ZNF331 ZNF564 ZNF80	GO:0051244	0	0	36
	GO:0050791	AFF4 ARHGEF2 CLASP1 CNOT7 DPF3 EIF1 GAP43 HSP90B1 KLF12 MCL1 NCBP1 NFE2L2 NFYA RBM14 SESN2 SHOX2 SMAD5 SOCS4 STK4 WARS ZNF192 ZNF37A ZNF434	CHES1 DIDO1 HBB HMGB2 KRAS LGALS1 MLLT6 NEDD4L NR4A1 PHF15 TMF1 TNNT3 ZNF331 ZNF564 ZNF80	GO:0050791	0	0	37
	GO:0016773	AKT2 CASK GK GKP3 PIK3C2A PIK3R3 PRKCI STK4 TAOK1	PIP5K2B VRK3	GO:0016773.MF.phosphotransferase activity, alcohol group as acceptor	0	0	38
	GO:0004672	AKT2 CASK PRKCI STK4 TAOK1	VRK3	GO:0004672.MF.protein kinase activity	0	0	39
	GO:0016301	AKT2 CASK GK GKP3 PIK3C2A PIK3R3 PRKCI STK4 TAOK1	PIP5K2B VRK3	GO:0016301.MF.kinase activity	0	0	40
	GO:0016772	AKT2 CASK GK GKP3 PIK3C2A PIK3R3 PRKCI STK4 TAOK1	PIP5K2B VRK3	GO:0016772.MF.transferase activity, transferring phosphorus-containing groups	0	0	41
	GO:0019222	AFF4 ARHGEF2 CLASP1 CNOT7 DPF3 EIF1 KLF12 NCBP1 NFE2L2 NFYA RBM14 SHOX2 SMAD5 ZNF192 ZNF37A ZNF434	CHES1 DIDO1 HBB HMGB2 MLLT6 NEDD4L NR4A1 PHF15 TMF1 ZNF331 ZNF564 ZNF80	GO:0019222.BP.regulation of metabolic process	0	0	42
	GO:0046914	ARHGEF2 B3GALT1 CARS DDEF1 DPF3 ESCO2 GALNT10 KLF12 MATR3 PRKCI RNF146 RSN SUV39H2 TRIM23 USP33 WDFY1 ZFR ZNF192 ZNF37A ZNF434 ZNF770 ZXDC	CYGB DIDO1 HBB HBE1 LOC440895 MBNL2 MLLT6 MMP14 NR4A1 PHF15 RNF5 ZNF331 ZNF564 ZNF80	GO:0046914.MF.transition metal ion binding	0	0	43
	GO:0006793	AKT2 CASK DUSP10 PRKCI PTPN3 STK4 TAOK1	ATP5C1 VRK3	GO:0006793.BP.phosphorus metabolic process	0	0	44
	GO:0006796	AKT2 CASK DUSP10 PRKCI PTPN3 STK4 TAOK1	ATP5C1 VRK3	GO:0006796.BP.phosphate metabolic process	0	0	44
	GO:0016740	ACAT2 ACSL3 AKT2 B3GALT1 CASK ESCO2 GALNT10 GK GKP3 HMGCS1 LPGAT1 PIK3C2A PIK3R3 PRKCI STK4 SUV39H2 TAOK1	ALAS2 PIP5K2B VRK3	GO:0016740.MF.transferase activity	0	0	46
	GO:0008270	ARHGEF2 CARS DDEF1 DPF3 ESCO2 KLF12 MATR3 PRKCI RNF146 RSN SUV39H2 TRIM23 USP33 WDFY1 ZFR ZNF192 ZNF37A ZNF434 ZNF770 ZXDC	DIDO1 LOC440895 MBNL2 MLLT6 MMP14 NR4A1 PHF15 RNF5 ZNF331 ZNF564 ZNF80	GO:0008270.MF.zinc ion binding	0	0	47
	GO:0006139	AFF4 CARS CNOT7 DPF3 FANCM HNRPU KLF12 NCBP1 NFE2L2 NFYA RBM14 SFRS10 SHOX2 SMAD5 SUV39H2 TRIM23 TRUB1 WARS ZNF192 ZNF37A ZNF434	ATP5C1 CHES1 DIDO1 HMGB2 MLLT6 NACA NR4A1 PHF15 TMF1 VRK3 ZNF331 ZNF564 ZNF80	GO:0006139.BP.nucleobase, nucleoside, nucleotide and nucleic acid metabolic process	0	0	48
	GO:0005737	ACAT2 ACSL3 CARS CASC5 CLASP1 DHX9 DUSP10 DYNC2H1 EIF1 EPB41 GK GKP3 HMGCR HMGCS1 HSP90B1 HSPA4 HSPH1 IFI44 LPGAT1 MCL1 PIK3C2A PIK3R3 PRKCI PTPN3 RAB6A RSN SEC22C STIP1 TPR TRIM23 USP33 WARS WDFY1	AFTPH ALAS2 ASAHL ATP5C1 COL3A1 COX6A1 CYGB DPP7 HBB HBE1 HMGB2 LGALS1 LOC440895 NACA PIP5K2B TNNT3	GO:0005737.CC.cytoplasm	0	0	49
	GO:0031323	AFF4 CNOT7 DPF3 EIF1 KLF12 NCBP1 NFE2L2 NFYA RBM14 SHOX2 SMAD5 ZNF192 ZNF37A ZNF434	CHES1 DIDO1 HMGB2 MLLT6 NR4A1 PHF15 TMF1 ZNF331 ZNF564 ZNF80	GO:0031323.BP.regulation of cellular metabolic process	0	0	50

## Sheet: supplTABLE E
SUPPLEMENTARY TABLE E
Pval: unadjusted P value from the Wilcoxn rank-sum test
BH-Pval: adjusted P value with the Benjamini-Hochberg method
B: B-statistics, log odds
XG: primary xenograft group
CL: cell line group
CLX: secondary xenograft group
Analysis of Functional Annotation Gene Ontology results: XG versus CL
The first 50 KEGG (or less) catergories that were enriched (adjusted P-value less than 0.05) are reported for the comparison between XG and CL, along with the genes esponsible for the enrichment (B-statistics more than 1.1 corresponding to a probability of differential expression greater than 0.75).
PATH2PROBE_wXGvsCL.PATH2PROBE.all: - Enriched Gene Sets - Bstat = 1.1 - Probability > 0.75026
	IDs	Genes_UP_Regulated_in_PATH2PROBE_wXGvsCL.PATH2PROBE.all	Genes_DW_Regulated_in_PATH2PROBE_wXGvsCL.PATH2PROBE.all	Description	Pval	BH-Pval	Rank
	ot04910	ACACB MAPK8 PHKA2 PRKAR1A SOCS1	EIF4E PIK3R3 PRKAA2 SHC3 SOCS2	ot04910_Insulin signaling pathway	0	0	1
	ot04010	ARRB1 FGFR3 MAP4K3 MAPK8 NF1	BDNF CACNA1I CASP3 DUSP10 FGF12 HSPA8 HSPA9B PLA2G12A	ot04010_MAPK signaling pathway	0	0	2
	ot00970		AARS CARS LARS MARS SARS WARS	ot00970_Aminoacyl-tRNA biosynthesis	0	0	3
	ot05210	AXIN1 FZD6 MAPK8	CASP3 CCND2	ot05210_Colorectal cancer	0	0	4
	ot04150	PGF ULK1	EIF4E PIK3R3 PRKAA2 VEGFC	ot04150_mTOR signaling pathway	0	0	5
	ot04530	ACTN4 CSNK2A1 CTNNA1 GNAI2 PRKCH PTEN	MAGI1	ot04530_Tight junction	0	0	6
	ot04120	CUL3 UBE2E3	ANAPC10 UBE2D1 UBE2D3	ot04120_Ubiquitin mediated proteolysis	0	0	7
	ot04720	ITPR3		ot04720_Long-term potentiation	0	0	8
	ot04810	ACTN4 ARHGEF12 ARHGEF4 BCAR1 FGFR3 GSN PIP5K1C TTN VAV2 VIL2	FGF12 PIK3R3	ot04810_Regulation of actin cytoskeleton	0	0	9
	ot04360	ARHGEF12 CXCR4 GNAI2 PLXNB2 ROBO1		ot04360_Axon guidance	0	0	10
	ot04520	ACTN4 CSNK2A1 CTNNA1 FARP2		ot04520_Adherens junction	0	0	11
	ot04510	ACTN4 BCAR1 COL5A1 FARP2 LAMA5 MAPK8 PGF PIP5K1C PTEN THBS1 TLN1 TTN VAV2	CCND2 PIK3R3 SHC3 VEGFC	ot04510_Focal adhesion	0	0	12
	ot04020	ATP2B3 GNAS ITPR3 NOS1 PHKA2 PLCG1 TTN	CACNA1I CYSLTR2 PPID	ot04020_Calcium signaling pathway	0	0	13
	ot00440		PRMT8 PTDSS1	ot00440_Aminophosphonate metabolism	0	0	14
	ot04070	CDS2 ITPR3 PIK4CA PIP5K1C PLCG1 PTEN	PIK3C2A PIK3R3	ot04070_Phosphatidylinositol signaling system	0	0	15
	ot03050	PSMB2	PSMA7	ot03050_Proteasome	0	0.01	16
	ot04912	GNAS ITPR3 MAPK8 MMP14	PLA2G12A	ot04912_GnRH signaling pathway	0	0.01	17
	ot04370	PLCG1	PIK3R3 PLA2G12A	ot04370_VEGF signaling pathway	0	0.01	18
	ot00533			ot00533_Keratan sulfate biosynthesis	0	0.02	19
	ot00100		DHCR7 FDFT1 FDPS HMGCR MVD MVK SQLE	ot00100_Biosynthesis of steroids	0	0.02	20
	ot00190	ATP5C1 COX4I2 COX6A1 NDUFB6 NDUFS1	ATP6V0A2 PPA2	ot00190_Oxidative phosphorylation	0	0.02	21
	ot04664	MAPK8 PLCG1 VAV2	PIK3R3 PLA2G12A	ot04664_Fc epsilon RI signaling pathway	0	0.02	22
	ot05050	ATN1	CASP3 MAGI1	ot05050_Dentatorubropallidoluysian atrophy (DRPLA)	0	0.02	23
	ot05040		BDNF CASP3 HIP2	ot05040_Huntington's disease	0	0.03	24
	ot00020			ot00020_Citrate cycle (TCA cycle)	0	0.04	25
Analysis of Functional Annotation Gene Ontology results: XG versus CLX
The first 50 (or less) KEGG catergories that were enriched (adjusted P-value less than 0.05) are reported for the comparison between XG and CLX, along with the genes esponsible for the enrichment (B-statistics more than 1.1 corresponding to a probability of differential expression greater than 0.75).
PATH2PROBE_wXGvsCLX.PATH2PROBE.all: - Enriched Gene Sets - Bstat = 1.1 - Probability > 0.75026
	IDs	Genes_UP_Regulated_in_PATH2PROBE_wXGvsCLX.PATH2PROBE.all	Genes_DW_Regulated_in_PATH2PROBE_wXGvsCLX.PATH2PROBE.all	Description	Pval	BH-Pval	Rank
	ot04510	AKT1 BIRC4 ITGAV LAMA5 MAPK1 PDPK1 PGF PPP1R12A SOS2	PARVA	ot04510_Focal adhesion	0	0	1
	ot04810	ABI2 ARHGEF4 FGD1 FGFR3 ITGAV MAPK1 PPP1R12A SOS2 SSH1	BDKRB1 F2R	ot04810_Regulation of actin cytoskeleton	0	0.01	2
	ot04120		ANAPC4 UBE2D3	ot04120_Ubiquitin mediated proteolysis	0	0.01	3
	ot04530	AKT1 CASK CLDN23		ot04530_Tight junction	0	0.01	4
	ot03010		C15orf15	ot03010_Ribosome	0	0.01	5
	ot04520	ACVR1B MAPK1 TGFBR1		ot04520_Adherens junction	0	0.01	6
	ot04010	ACVR1B AKT1 CACNA2D2 FGFR3 MAPK1 RASA2 SOS2 TGFBR1	PLA2G12A	ot04010_MAPK signaling pathway	0	0.01	7
	ot04020	ATP2B2 ATP2B3 NOS1 PHKA2 TRPC1	BDKRB1 F2R ITPR2 PPID	ot04020_Calcium signaling pathway	0	0.01	8
	ot00533	CHST1		ot00533_Keratan sulfate biosynthesis	0	0.02	9
	ot05210	AKT1 MAPK1 SOS2 TGFBR1		ot05210_Colorectal cancer	0	0.04	10
	ot04110	CDKN1C RBL1	ANAPC4	ot04110_Cell cycle	0	0.08	11
Analysis of Functional Annotation Gene Ontology results: CL versus CLX
The first 50 (or less) KEGG catergories that were enriched (adjusted P-value less than 0.05) are reported for the comparison between CL and CLX, along with the genes esponsible for the enrichment (B-statistics more than 1.1 corresponding to a probability of differential expression greater than 0.75).
PATH2PROBE_wCLsCLX.PATH2PROBE.all: - Enriched Gene Sets - Bstat = 1.1 - Probability > 0.75026
	IDs	Genes_UP_Regulated_in_PATH2PROBE_wCLsCLX.PATH2PROBE.all	Genes_DW_Regulated_in_PATH2PROBE_wCLsCLX.PATH2PROBE.all	Description	Pval	BH-Pval	Rank
	ot04510	AKT2 PIK3R3	COL3A1	ot04510_Focal adhesion	0	0	1
	ot04010	AKT2 DUSP10 HSPA8 STK4	KRAS NR4A1	ot04010_MAPK signaling pathway	0	0	2
	ot05210	AKT2	KRAS	ot05210_Colorectal cancer	0	0	3
	ot04350	SMAD5		ot04350_TGF-beta signaling pathway	0	0	4
	ot04810	PIK3R3	KRAS PIP5K2B	ot04810_Regulation of actin cytoskeleton	0	0	5
	ot04020	PDE1C		ot04020_Calcium signaling pathway	0	0	6
	ot00100	HMGCR SQLE		ot00100_Biosynthesis of steroids	0	0	7
	ot04210	AKT2 PIK3R3		ot04210_Apoptosis	0	0	8
	ot04150	AKT2 PIK3R3		ot04150_mTOR signaling pathway	0	0	9
	ot04910	AKT2 PIK3R3 PRKCI	KRAS	ot04910_Insulin signaling pathway	0	0	10
	ot05110	TRIM23	ATP6V0D2	ot05110_Cholera	0	0	11
	ot04310			ot04310_Wnt signaling pathway	0	0.01	12
	ot04520			ot04520_Adherens junction	0	0.01	13
	ot03010			ot03010_Ribosome	0	0.01	14
	ot04120		NEDD4L	ot04120_Ubiquitin mediated proteolysis	0	0.01	15
	ot04720		KRAS	ot04720_Long-term potentiation	0	0.01	16
	ot04360		KRAS ROBO1	ot04360_Axon guidance	0	0.02	17
	ot04912		KRAS MMP14	ot04912_GnRH signaling pathway	0	0.03	18
	ot04662	AKT2 PIK3R3	KRAS	ot04662_B cell receptor signaling pathway	0	0.03	19
	ot05130	ARHGEF2		ot05130_Pathogenic Escherichia coli infection	0	0.03	20
	ot05131	ARHGEF2		ot05131_Pathogenic Escherichia coli infection	0	0.03	20
	ot00251	GPT2		ot00251_Glutamate metabolism	0	0.03	22
	ot05050			ot05050_Dentatorubropallidoluysian atrophy (DRPLA)	0	0.03	23
	ot04710			ot04710_Circadian rhythm	0	0.03	24

## Sheet:  supplTABLE F
SUPPLEMENTARY TABLE F
Pval: unadjusted P value from the Wilcoxn rank-sum test
BH-Pval: adjusted P value with the Benjamini-Hochberg method
B: B-statistics, log odds
XG: primary xenograft group
CL: cell line group
CLX: secondary xenograft group
Analysis of Functional Annotation Gene Ontology results: XG versus CL
The first 50 MsigDB curated pathways (or less) catergories that were enriched (adjusted P-value less than 0.05) are reported for the comparison between XG and CL, along with the genes esponsible for the enrichment (B-statistics more than 1.1 corresponding to a probability of differential expression greater than 0.75).
MsigC2v2_wXGvsCL.MsigC2v2.all: - Enriched Gene Sets - Bstat = 1.1 - Probability > 0.75026
	IDs	Genes_UP_Regulated_in_MsigC2v2_wXGvsCL.MsigC2v2.all	Genes_DW_Regulated_in_MsigC2v2_wXGvsCL.MsigC2v2.all	Description	Pval	BH-Pval	Rank
	TAKEDA_NUP8_HOXA9_16D_DN	CFLAR CPNE2 CUGBP2 GPD2 IGFBP4 IMMP2L LRRFIP1 MGAT5 MTMR3 PAN3 PELI1 PSMB2 TBC1D8 THRAP2	CXCL5 FCHSD2	TAKEDA_NUP8_HOXA9_16D_DN	0	0	1
	ALZHEIMERS_DISEASE_UP	ABCA2 CDKN1C CFLAR CNOT2 CTDSP1 CTDSP2 CTNNA1 DAAM1 DPH5 ELF4 FBXO11 FBXW4 FGFR3 FLJ21865 FZD10 GFPT2 GTF3C1 GUSB HES1 JMJD1A KTN1 LDLRAP1 LRDD LRRFIP1 MARK3 MKRN1 MSH4 MYO10 MYO1E OFD1 PDPN PHKA2 PLXNB2 PRL RAB22A RBBP6 SAPS3 SP3 SPSB3 SRRM2 TRIOBP USP7 UTX	CASP3 CCRN4L CUL5 FDFT1 FDPS IFRD1 LDLR MAP4 MVK PAQR3 TAX1BP3 TIMM17A VEGFC VRK3	ALZHEIMERS_DISEASE_UP	0	0	1
	UVC_TTD_4HR_DN	CNOT2 DAAM1 MGAT5 MTMR3 MYO10 PCTK2 SIPA1L1 THRAP2 TRIO USP34	ANAPC10 CAMSAP1L1 EIF4E FCHSD2 HNRPDL IFRD1 SCC-112 VEGFC	UVC_TTD_4HR_DN	0	0	1
	UVC_XPCS_8HR_DN	CDS2 CNOT2 MARK3 MGLL MYO10 PKP4 PTEN SMC5 STK24 SUZ12 THRAP2 TOP2A TRIO USP9X XPO1	ABCE1 ACSL3 ATP11B CAMSAP1L1 EIF4E FCHSD2 HERC4 HNRPDL IFRD1 PIK3C2A RAB6A SCC-112 VEGFC	UVC_XPCS_8HR_DN	0	0	1
	RCC_NL_UP	ASCC3L1 CALU CFLAR FZD6 GTF3C1 IMMP2L ITPR3 NBR1 NDUFB6 PSMB2 SFRS7 SRRM2 TOP2A USP9X VAV2 XPO1	AARS ASF1A CBX3 DENR EGLN1 EIF4G2 FBXO28 GRSF1 HNRPD HNRPDL HSPH1 PAICS RAB6A SCC-112 SLC30A9 SLC3A2 SQLE TFG TMED5 TMEM167 USP46 ZDHHC3	RCC_NL_UP	0	0	1
	STEMCELL_NEURAL_UP	ATP5C1 CALU CCNF CSNK2A1 CUGBP2 CUL3 DIDO1 DPH5 EED EZH2 GNAI2 GPD2 GUSB H19 HNRPM KTN1 LAMA5 LAMP2 LGALS1 LRRFIP1 MAGED1 MAP4K3 MLLT10 MOSC2 MYO10 NACA NAV2 NBR1 NDUFB6 NDUFS1 NOTCH3 PDPN PELI1 PITPNB PRKAR1A RANBP9 ROBO1 SAPS3 SFRS7 SMU1 SP3 STK24 SUZ12 TCEA1 TMEM77 TRIO TRIP6 TUBB6 UBE1C UBE2E3 USP34 USP9X XPO1 ZFAND6	ABCE1 API5 ARF4 ASAH1 ASF1A ASNS ATP6V0A2 BAG2 CACYBP CASP3 CBX3 CCNA2 CCT8 CDC25A CNIH4 CYP51A1 DCUN1D5 DHCR7 DLAT EIF4E EIF4G2 ELOVL5 ETFDH EXO1 FDPS GALNT10 GPIAP1 GPR125 GRPEL1 GTF2H1 HERC4 HIP2 HMGCR HMGCS1 HNRPD HNRPDL HSPA4 KIAA1524 LDLR MAD2L1 MARS MRPL13 MRPL48 MVD MVK PDCD5 PGD PGM2 POLR3K PPA2 PPID PSMA7 SAS10 SC4MOL SEC22B SHC3 SLC39A1 SMARCA5 SOCS2 SQLE STIP1 TAX1BP3 TCP1 TRAPPC4 UBE…	STEMCELL_NEURAL_UP	0	0	1
	UVC_TTD_ALL_DN	CNOT2 DAAM1 MGAT5 MGLL MTMR3 MYO10 PCTK2 PKP4 SIPA1L1 THRAP2 TRIO USP34	ANAPC10 CAMSAP1L1 EIF4E FCHSD2 HNRPDL IFRD1 SCC-112 VEGFC	UVC_TTD_ALL_DN	0	0	1
	STEMCELL_EMBRYONIC_UP	CALU CCNF CDKN1C CDS2 COL5A1 CSNK2A1 CTNNA1 CUL3 DIDO1 DPH5 EED H19 JMJD1A KTN1 LAMA5 MAP4K3 MKRN1 NDUFB6 NDUFS1 NFATC2IP NOTCH3 PDPN PITPNB POLA2 PSMB2 RBPMS ROBO1 SMU1 SUZ12 TCEA1 TRIP6 TUBB6 UBE1C USP34 USP7 USP9X UTX XPO1	ABCE1 ASAH1 ASF1A ASNS BDNF CACYBP CARS CBX3 CCRN4L CCT8 CDC25A CXCL5 CYP51A1 DCUN1D5 DLAT EIF4E EIF4G2 EXO1 FDPS FDX1 GFM2 GRSF1 GTF2H1 HERC4 HIP2 HMGCR HMGCS1 HNRPD HSPA4 IFRD1 KIAA1524 LARS LDLR MAD2L1 MARS MASA MRPL48 PDCD5 POLR3K PPA2 PPID PSMA7 RAP2A SAS10 SEC22B SMARCA5 SOCS2 SQLE STIP1 TCP1 TIMM17A TIPRL TXNL5 UBE2D3 UBE2N UCHL5	STEMCELL_EMBRYONIC_UP	0	0	1
	UVC_XPCS_ALL_DN	CDS2 CNOT2 MARK3 MGLL MTMR3 MYO10 PCTK2 PKP4 PTEN SMC5 STK24 SUZ12 THRAP2 TOP2A TRIO USP9X XPO1	ABCE1 ACSL3 ATP11B CAMSAP1L1 EIF4E FCHSD2 HERC4 HNRPDL IFRD1 PIK3C2A PRR3 RAB6A SCC-112 VEGFC	UVC_XPCS_ALL_DN	0	0	1
	PENG_GLUTAMINE_DN	RBBP6 TOP1 XPO1	ACAT2 CCT2 CDC25A DHCR24 DHCR7 EIF4G2 FDFT1 HSPA4 HSPA8 PAICS PIK3R3 PTDSS1 SC4MOL SCD SQLE TCP1 TIMM17A UBE2N	PENG_GLUTAMINE_DN	0	0	1
	STEMCELL_HEMATOPOIETIC_UP	ARRB1 AXIN1 CDKN1C CEP250 CRSP2 CTDSP2 DPH5 FLCN GFPT2 GPD2 GTF3C1 JMJD1A KIAA0251 KTN1 LRRFIP1 MAGED1 MAP4K3 MAPK8 MLLT10 NAV2 NINJ1 NPEPL1 PCTK1 PELI1 RBBP6 RBPMS STAT3 TLN1 TNFAIP2 TRIP6 UBE2E3 UBE2I ULK1 USP7 USP9X XPO1 YLPM1	ASNS ATF3 CARS CASP3 CLCN3 CYP51A1 EIF4G2 ETNK1 FDX1 HSPA4 IFRD1 LARS MRPL44 MRPL48 MVK PGM2 PHF23 SAMHD1 SCAMP1 SGCB SLC3A2 SOCS2 TSC22D1 USP38 VEGFC VRK3 WARS	STEMCELL_HEMATOPOIETIC_UP	0	0	1
	ALZHEIMERS_DISEASE_DN	ARHGEF4 ATP5C1 CCNG2 CDS2 COX6A1 CSNK2A1 FGFR3 GNAS LZTS1 MAGED1 MAP4K3 MGLL MPPED1 NRXN1 PCTK1 PIK4CA PIP5K1C PRKAR1A PSMB2 PTEN RANBP9 ROBO1 SFRS5 STK24 UBE1C UBE2E3 USP9X	AASDHPPT ABCE1 ACSL3 ARF4 ASAH1 ASF1A CACYBP CCND2 CCT2 DHCR7 GRPEL1 HNRPD HNRPDL HSPA8 HSPA9B HSPH1 IFRD1 MASA MRPL13 NETO2 PDCD5 PPID PSAT1 PTDSS1 RAB6A RAP1GDS1 RCHY1 SCAMP1 SLC30A9 SOCS2 TIMM17A TMEM126B UBE2D3 UBE2N	ALZHEIMERS_DISEASE_DN	0	0	1
	LEE_TCELLS2_UP	ACACB AHI1 AHSA2 ANKH AUTS2 BTBD3 CCNG2 CRSP2 EZH2 GPRASP1 GUSB HES1 LDLRAP1 LOC146909 LOC153222 LOC283666 LOC492311 MAGED1 MFI2 NDUFB6 NPHP3 PTEN RBM33 RP4-691N24.1 TMEPAI TOB1 TOP2A UBE2E3	ACAT2 ASAH1 ASNS CAMSAP1L1 CCNA2 CDC25A DENR FDFT1 HSPA4 LEPROTL1 MAD2L1 MTMR2 NDFIP2 OXNAD1 PAICS RAP1GDS1 SAMHD1 SCD SLC30A9 SOCS2 SQLE TAX1BP3 TCP1 TSC22D1 WARS	LEE_TCELLS2_UP	0	0	13
	PENG_RAPAMYCIN_DN	CALU GTF3C1 PITPNB RBBP6	ACAT2 ASNS CCT2 CDC25A DHCR24 EIF4G2 HSPA4 HSPA8 HSPA9B JTB MARS POLR2B PTDSS1 SCD SLC3A2 SQLE TCP1 TIMM17A	PENG_RAPAMYCIN_DN	0	0	14
	UVC_XPCS_4HR_DN	CNOT2 MARK3 MTMR3 MYO10 PCTK2 THRAP2 TRIO	ACSL3 CAMSAP1L1 FCHSD2 IFRD1 PRR3 VEGFC	UVC_XPCS_4HR_DN	0	0	15
	PENG_LEUCINE_DN	TOP1	ACAT2 CCNA2 CCT2 DHCR24 EIF4G2 FDPS GART HSPA4 HSPA8 PIK3R3 PSMA7 SCD SQLE TCP1 TIMM17A UBE2N	PENG_LEUCINE_DN	0	0	16
	FLECHNER_KIDNEY_TRANSPLANT_WELL_UP	AUTS2 BTBD3 CALU CCNG2 CFLAR CTNNA1 GSN IGFBP4 LAMP2 LGALS1 LOC91316 LRRFIP1 NACA NDUFS1 PRKAR1A PSMB9 RBPMS SP3 STAT3 TOB1 XPO1	ACSL3 ARF4 ASF1A CCT2 ELOVL5 HERPUD1 HNRPDL HSPA8 JTB LEPROTL1 PIK3C2A PPID SC4MOL SCAMP1 SEC22B TMED5 TSC22D1 UBE2N UGT8	FLECHNER_KIDNEY_TRANSPLANT_WELL_UP	0	0	17
	PENG_GLUTAMINE_UP	CABIN1 CCNG2 CDKN1C CDS2 CTDSP2 DAAM1 DDB2 GSN ITPR3 PLXNB2 SMTN TOP2A TRIO	AARS ASNS CARS IFRD1 MARS PPP2R5A SARS SLC30A9 SLC3A2 TERF2 WARS	PENG_GLUTAMINE_UP	0	0	18
	ET743_SARCOMA_DN	CFLAR CSNK2A1 EML4 SRRM2 TOP1 TOP2A	ACSL3 BAG2 CCNA2 GTF2H1 HERC4 HSPA8 HSPH1 MRPL1 RAB6A SMARCA5 UBE2D3 VEGFC	ET743_SARCOMA_DN	0	0	19
	UVB_NHEK1_DN	AUTS2 BTBD3 CNOT2 DIDO1 SMC5 SP3 TBC1D8 THRAP2 TOP2A XPO1	HISPPD1 MTMR6 RCHY1 VEGFC ZNF451	UVB_NHEK1_DN	0	0	20
	TARTE_PLASMA_BLASTIC	CCNF EED EZH2 LGALS1 NDUFS1 PSMB2 TOP1 TOP2A	ABCE1 ASNS CCNA2 CCND2 CCT2 CLCN3 DHCR24 FDFT1 FDPS GART GPIAP1 HSPA4 HSPA9B LDLR MAD2L1 PAICS TAX1BP3 TCP1 TIMM17A UBE2D3 WARS	TARTE_PLASMA_BLASTIC	0	0	21
	UVC_TTD_8HR_DN	MGLL MYO10 PKP4 THRAP2 TRIO	EIF4E FCHSD2 IFRD1 SCC-112 VEGFC	UVC_TTD_8HR_DN	0	0	22
	HSC_EARLYPROGENITORS_FETAL	ARMCX4 CSRP1 DPH5 EXOSC6 MGAT5 NF1 NPEPL1 SMU1 YLPM1	ABCE1 DHCR7 DLAT DTNBP1 ELOVL5 ENDOGL1 FDX1 KCNK12 MRPL44 MVD PPID PRR3 SGCB TCP1 TMEM103 TRAPPC4	HSC_EARLYPROGENITORS_FETAL	0	0	23
	HSC_EARLYPROGENITORS_SHARED	ARMCX4 CSRP1 DPH5 EXOSC6 MGAT5 NF1 NPEPL1 SMU1 YLPM1	ABCE1 DHCR7 DLAT DTNBP1 ELOVL5 ENDOGL1 FDX1 KCNK12 MRPL44 MVD PPID PRR3 SGCB TCP1 TMEM103 TRAPPC4	HSC_EARLYPROGENITORS_SHARED	0	0	23
	UVC_TTD-XPCS_COMMON_DN	MARK3 MGLL MTMR3 PCTK2 PKP4	ACSL3	UVC_TTD-XPCS_COMMON_DN	0	0	25
	HSC_EARLYPROGENITORS_ADULT	ARMCX4 CSRP1 DPH5 EXOSC6 MGAT5 NF1 NPEPL1 SMU1 YLPM1	ABCE1 DHCR7 DLAT DTNBP1 ELOVL5 ENDOGL1 FDX1 KCNK12 MRPL44 MVD PPID PRR3 SGCB TCP1 TMEM103 TRAPPC4	HSC_EARLYPROGENITORS_ADULT	0	0	26
	MITOCHONDRIA	ATP5C1 COX6A1 GNAS GPD2 NDUFB6 NDUFS1	DLAT ETFDH FDX1 FXC1 HSPA9B MRPL13 MRPL44 MRPL48 MTO1 SLC30A9 TIMM17A TIMM8B	MITOCHONDRIA	0	0	27
	PGC	ABCA2 ATP5C1 CMKOR1 COX6A1 MAPK8 NDUFB6 NINJ1 RAB40C SAT ULK1	EGLN1 FDX1 FXC1 GRPEL1 GRSF1 HSPA9B IFRD1 MARS MRPL13 SCD TIMM17A TIMM8B	PGC	0	0	28
	MOREAUX_TACI_HI_VS_LOW_DN	DKFZP686P18101 EZH2 NOMO3	AASDHPPT ANAPC10 ASF1A CCT2 HISPPD1	MOREAUX_TACI_HI_VS_LOW_DN	0	0	29
	HUMAN_MITODB_6_2002	ATP5C1 COX6A1 GPD2 NDUFB6 NDUFS1	DLAT ETFDH FDX1 HSPA9B MRPL13 MRPL44 MRPL48 PPID TIMM17A TIMM8B	HUMAN_MITODB_6_2002	0	0	30
	SERUM_FIBROBLAST_CORE_DN	ANKDD1A CALCOCO1 CDKN1C CST3 ECHDC2 KIAA1305 LOC153222 LOC492311 OLFML2A PDK2 YPEL3	ACSL3 FDPS HMGCS1 LDLR MVD SC4MOL SCD SESN2 SQLE TSC22D1 VAMP4	SERUM_FIBROBLAST_CORE_DN	0	0	31
	ET743_SARCOMA_48HRS_DN	CFLAR CSNK2A1 EML4 TOP1 TOP2A	BAG2 CCNA2 GTF2H1 HERC4 HSPA8 HSPH1 MRPL1 SMARCA5 UBE2D3 VEGFC	ET743_SARCOMA_48HRS_DN	0	0	32
	VHL_NORMAL_UP	CALU CEP250 CFLAR DIDO1 FZD6 SFRS7 TOP2A	CBX3 FBXO28 HNRPD HNRPDL HSPH1 PAICS PGM2 SLC30A9 SLC3A2 SQLE TFG TMED5 TMEM167	VHL_NORMAL_UP	0	0	33
	ET743_SARCOMA_72HRS_DN	CFLAR EML4 TOP1 TOP2A	ACSL3 BAG2 CCNA2 GTF2H1 HERC4 HSPA8 HSPH1 MRPL1 SMARCA5 UBE2D3 VEGFC	ET743_SARCOMA_72HRS_DN	0	0	34
	CMV_HCMV_TIMECOURSE_ALL_UP	ARL4A AUTS2 CG018 EZH2 FGFR3 KIAA0247 RBBP6 RORA SUZ12 TMF1 YLPM1 ZBTB5	ABCC5 ASNS ATF3 ETFDH GRPEL1 HERPUD1 KLHL18 LDLR NEU1 PAQR3 PRKAA2 RCHY1 SAMHD1 SOCS2 STIP1 TMEM110	CMV_HCMV_TIMECOURSE_ALL_UP	0	0	35
	DIAB_NEPH_DN	AP3B1 CALU CDKN1C CFLAR CG018 CTNNA1 MGAT5 MYO1E NDRG1 PLXNB2 PRKAR1A PSMB9 TOB1 USP9X XPO1	AASDHPPT ACSL3 CAMSAP1L1 CYP51A1 HNRPDL TMED5 USP46 WARS	DIAB_NEPH_DN	0	0	36
	HDACI_COLON_BUT_DN	CTNNA1 LAMP2 MBNL2 OFD1 PCBP2 PRKAR1A RBBP6 TIMP3 TMEM77	ABCE1 ATP11B CCND2 EIF4E FDPS GPR125 HERPUD1 IFRD1 RAB6A SARS SCD TMED5	HDACI_COLON_BUT_DN	0	0	37
	REOVIRUS_HEK293_DN	ABCA2 AP1G2 CTDSP2 DDB2 FGFR3 GNAI2 ITPR3 LAMA5 MAGED1 MYO10 NOTCH3 PLXNB2 POLA2 RBBP6 TNFAIP2 ULK1	DHCR24 DHCR7 HNRPDL MAP4 SQLE	REOVIRUS_HEK293_DN	0	0	38
	REOVIRUS_HEK293_UP	NF1 PCTK2 PITPNB PSMB9 THRAP2 UBE1C USP9X	ANAPC10 ATF3 CASP3 EIF4E FBXO28 IFRD1 LSM6 RCHY1 SAMHD1 SLC3A2 TBC1D9 TIMM17A UBE2D1	REOVIRUS_HEK293_UP	0	0	39
	BAF57_BT549_DN	ADAMTS2 MXRA5 PSMB9 SPON2 STEAP3	AASDHPPT ABCE1 ABI3BP CACYBP CDC25A CXCL5 DLAT EIF4E FGF12 FLJ20186 GLRX2 GRPEL1 HMGCS1 HNRPD HSPA4 HSPA9B HSPH1 MAD2L1 MASA MRPL13 PAQR3 PDCD5 PPA2 SCC-112 SMARCA5 SPCS3 TMEM33	BAF57_BT549_DN	0	0	40
	BASSO_REGULATORY_HUBS	CG018 CTNNA1 DDB2 LGALS1 NDRG1 PSMB2	ASNS CCNA2 CCND2 HSPA9B MAD2L1 PAICS TCP1 TIMM17A	BASSO_REGULATORY_HUBS	0	0	41
	BRCA_ER_NEG	ALDH1A3 CALU COL9A3 CUGBP2 CXCR4 EED EML4 EZH2 LAMP2 MYO10 NDRG1 POLA2 PSMB2 PSMB9 SFRS7 STEAP3 TNFAIP2 TRIP6 TUBB6 UBE2E3	AARS ACAT2 ASNS ATF3 ATP11B ATP6V0A2 CCNA2 CNIH4 DHCR7 EXO1 FDX1 FLJ20186 GLRX2 IFRD1 MAD2L1 MTMR2 PDCD5 PGM2 PSAT1 PTDSS1 SAMHD1 UCHL5 UGT8 WARS	BRCA_ER_NEG	0	0	42
	POD1_KO_DN	ARRB1 BTBD3 CDKN1C CFLAR CUGBP2 CXCR4 DACH1 GPD2 GSN LOC492311 LRRFIP1 MBNL2 MGAT5 MGLL MKRN1 MYO10 MYO1E PRKCH RANBP9 RBBP6 RBPMS RORA THBS1 TIMP3 TOB1 USP9X UTX	CCRN4L CDC73 GALNT10 GLRX2 HISPPD1 IFRD1 MTMR2 MTMR6 PGM2 TMEM33 USP46	POD1_KO_DN	0	0	43
	HDACI_COLON_SUL48HRS_UP	CMTM4 CSNK2A1 DNAJA4 RBM33 XPO1	ABCE1 API5 SCD	HDACI_COLON_SUL48HRS_UP	0	0	44
	UVC_HIGH_ALL_DN	AUTS2 CNOT2 CTDSP2 ELF4 MTMR3 PITPNB PKP4 STK24 THBS1 TOP2A XPO1	CASP3 CBX3 CCNA2 EIF4E HERPUD1 HMGCR SQLE UBE2N VEGFC	UVC_HIGH_ALL_DN	0	0	45
	HSC_LATEPROGENITORS_ADULT	COL5A1 LOC339745 PITPNB RC3H1 SIPA1L1 STK24 VIL2 WNT4	ABCC5 API5 BAG2 CHAC1 ELMOD2 FDPS GALNT10 SC4MOL TMEM167 TMEM33 TTC9C USP46	HSC_LATEPROGENITORS_ADULT	0	0	46
	HSC_LATEPROGENITORS_FETAL	COL5A1 LOC339745 MKRN1 PITPNB RC3H1 SIPA1L1 WNT4	ABCC5 API5 BAG2 CHAC1 ELMOD2 FDPS GALNT10 SC4MOL TMEM167 TMEM33 TTC9C USP46	HSC_LATEPROGENITORS_FETAL	0	0	47
	RUTELLA_HEMATOGFSNDCS_DIFF	CCNG2 CDKN1C CDS2 CFLAR CRSP2 CSRP1 CUGBP2 CXCR4 DUOX1 EED GPD2 LAMP2 MGLL NDRG1 NFATC2IP PELI1 ROBO1 SUZ12 THRAP2 TNK2 TTN	ACSL3 ASAH1 CASP3 CXCL5 DHCR24 DHCR7 FCHSD2 FDX1 GRPEL1 GRSF1 HERPUD1 LDLR NETO2 SCD SEC22B SLC3A2 SLC7A11 SQLE TFG TSC22D1	RUTELLA_HEMATOGFSNDCS_DIFF	0	0	48
	HDACI_COLON_SUL_UP	CMTM4 CSNK2A1 DNAJA4 RBM33 XPO1	ABCE1 API5 SARS SCD SESN2	HDACI_COLON_SUL_UP	0	0	49
	HDACI_COLON_SUL_DN	AMMECR1 CTNNA1 LRDD MBNL2 NACA NDUFB6 OFD1 PDZD2 PRKAR1A RBBP6 STAT5A TMF1	CAMSAP1L1 EIF4G2 GPIAP1	HDACI_COLON_SUL_DN	0	0	50
Analysis of Functional Annotation Gene Ontology results: XG versus CLX
The first 50 MsigDB curated pathways (or less) catergories that were enriched (adjusted P-value less than 0.05) are reported for the comparison between XG and CLX, along with the genes esponsible for the enrichment (B-statistics more than 1.1 corresponding to a probability of differential expression greater than 0.75).
MsigC2v2_wXGvsCLX.MsigC2v2.all: - Enriched Gene Sets - Bstat = 1.1 - Probability > 0.75026
	IDs	Genes_UP_Regulated_in_MsigC2v2_wXGvsCLX.MsigC2v2.all	Genes_DW_Regulated_in_MsigC2v2_wXGvsCLX.MsigC2v2.all	Description	Pval	BH-Pval	Rank
	ALZHEIMERS_DISEASE_UP	ACVR1B CASK CDKN1C CEP350 CFLAR CNOT2 CROP DPH5 ELF4 FGFR3 FZD10 GLI2 HRBL JMJD1A MAPK1 MKRN1 MSH4 NIPBL PHKA2 PHLDA3 PLXNB2 RBBP6 SNTA1 SPSB3 SSH1 STAG2 USP7 UTX VGLL4	COMT F2R ICAM1 PAQR3 STX5 VRK3	ALZHEIMERS_DISEASE_UP	0	0	1
	UVC_XPCS_8HR_DN	ACSL3 CASK CEP350 CLASP1 CNOT2 KIAA1033 MGLL MKLN1 NIPBL PKP4 PPP1R12A PRKCBP1 RSN SOS2 SRGAP2 TOP2A TRIO USP9X	ABCE1 SCC-112	UVC_XPCS_8HR_DN	0	0	1
	STEMCELL_NEURAL_UP	AKT1 ARHGAP21 ASF1B ATP6AP1 ATP6AP2 CASK COMMD1 DDR1 DPH5 FGD1 FMR1 GPD2 H2AFY HELLS HNRPM LAMA5 LAMP2 MAGED1 MKLN1 NAV2 NIPBL PHLDA3 PITPNB PRKCBP1 RANBP9 RBBP7 RBL1 RRM2 SOS2 SRGAP2 STAG2 TPM4 TRIO UBE2A USP34 USP9X	ABCE1 ANAPC4 CACYBP CRTAP DCUN1D5 DLAT ETFDH F2R GPR125 GRPEL1 HNRPD MRPL48 PGD PPID PSMA1 PSMD7 PSPC1 PWP1 SNRPA1 UBE2D3	STEMCELL_NEURAL_UP	0	0	1
	UVC_TTD_ALL_DN	ABI1 BICD1 CASK CEP350 CLASP1 CNOT2 MGAT5 MGLL MTMR3 NCOA1 NIPBL PCTK2 PKP4 PPP1R12A PRKCBP1 PSD3 RSN SRGAP2 TRIO USP34	CREB5 SCC-112	UVC_TTD_ALL_DN	0	0	1
	STEMCELL_EMBRYONIC_UP	ABI1 ATP1B1 CASK CDKN1C DPH5 HELLS IREB2 JMJD1A LAMA5 MKRN1 NFATC2IP PHLDA3 PITPNB PRKCBP1 RBBP7 RRM2 SLC20A1 TPM4 USP34 USP7 USP9X UTX	ABCE1 CACYBP CLNS1A COX18 CRTAP DCUN1D5 DLAT FDX1 HNRPD JOSD3 MRPL48 OTUD4 PPID PSMA1 PSMD7 PSPC1 PWP1 SNRPA1 TOMM20 UBE2D3	STEMCELL_EMBRYONIC_UP	0	0	1
	UVC_XPCS_ALL_DN	ACSL3 BICD1 CASK CEP350 CLASP1 CNOT2 KIAA1033 MGLL MKLN1 MTMR3 NCOA1 NIPBL PCTK2 PKP4 PPP1R12A PRKCBP1 RSN SOS2 SRGAP2 TOP2A TRIO USP9X	ABCE1 SCC-112	UVC_XPCS_ALL_DN	0	0	1
	UVC_XPCS_4HR_DN	ACSL3 BICD1 CEP350 CNOT2 MTMR3 NCOA1 NIPBL PCTK2 PPP1R12A PRKCBP1 RSN SOS2 SRGAP2 TRIO		UVC_XPCS_4HR_DN	0	0	7
	UVC_TTD_4HR_DN	ABI1 BICD1 CEP350 CLASP1 CNOT2 MGAT5 MTMR3 NCOA1 NIPBL PCTK2 PPP1R12A PRKCBP1 PSD3 RSN SRGAP2 TRIO USP34	CREB5 SCC-112	UVC_TTD_4HR_DN	0	0	8
	TAKEDA_NUP8_HOXA9_16D_DN	CFLAR FAM119A GPD2 IGFBP4 JMJD1C MGAT5 MTMR3 PAN3 PAPD4 TGFBR1 USP31	ANKRD11 BHLHB3 BPI	TAKEDA_NUP8_HOXA9_16D_DN	0	0	9
	UVB_NHEK1_DN	BTBD3 CEP350 CLASP1 CNOT2 NIPBL PPP1R12A PRKCBP1 PSD3 RIF1 TOP2A	OTUD4 RCHY1	UVB_NHEK1_DN	0	0	10
	CHEN_HOXA5_TARGETS_UP	CNOT2 JMJD1A JMJD1C PCTK2 PGS1 PPP1R12A RBBP6 SDCCAG1 TRPC1	BDKRB1 CREB5 JOSD3 PSPC1 RCHY1	CHEN_HOXA5_TARGETS_UP	0	0	11
	ALZHEIMERS_DISEASE_DN	ACSL3 ARHGEF4 ATP1B1 ATP2B2 ATP6AP1 ATP6AP2 FGFR3 H2AFY L1CAM LZTS1 MAGED1 MAPK1 MEF2A MGLL MPPED1 NRXN1 PCTK1 PGS1 PIK4CA PJA1 PPP1R12A PSD3 RANBP9 RBBP7 RSN RTN4 SRP54 TRPC1 TSPAN7 UBE2A UBE2B USP9X	ABCE1 CACYBP GRPEL1 HBB HNRPD KATNB1 NDFIP1 PPID PSMA1 PSPC1 RCHY1 SNRPA1 SPCS1 SRP72 THYN1 TOMM20 UBE2D3	ALZHEIMERS_DISEASE_DN	0	0	12
	RCC_NL_UP	ABI2 ARHGAP21 ASCC3L1 CFLAR DDX17 DEXI PGS1 TOP2A TPX2 UBE2B USP9X	HNRPD MMP28 POFUT2 PSMD7 SCC-112 TOMM20	RCC_NL_UP	0	0	13
	UVC_TTD_8HR_DN	CASK MGLL PKP4 PPP1R12A TRIO	CREB5 SCC-112	UVC_TTD_8HR_DN	0	0	14
	LEE_TCELLS2_UP	ATAD2 BTBD3 CRSP2 GPRASP1 H2AFY HELLS LOC283666 MAGED1 NPHP3 RASA2 RRM2 SESTD1 SETBP1 TGFBR1 TOP2A TPM4 UBE2A USP11	ITPR2 NDFIP1 SIRPG ZNF496	LEE_TCELLS2_UP	0	0	15
	STEMCELL_HEMATOPOIETIC_UP	ARHGAP21 CDKN1C CEP350 CRSP2 DDX17 DNAJC1 DPH5 GPD2 JMJD1A MAGED1 NAV2 NINJ1 PCTK1 PGS1 RBBP6 SLC20A1 USP7 USP9X	ANAPC4 ANGEL2 COMT CRTAP ENG FDX1 JOSD3 MRPL48 STX5 VRK3	STEMCELL_HEMATOPOIETIC_UP	0	0	16
	UVC_TTD-XPCS_COMMON_DN	ACSL3 CASK CLASP1 MGLL MTMR3 NCOA1 PCTK2 PKP4 SOS2	CREB5	UVC_TTD-XPCS_COMMON_DN	0	0	17
	RUTELLA_HEMATOGFSNDCS_DIFF	ACSL3 CDKN1C CEP350 CFLAR CRSP2 CSRP1 DHRS4 DUOX1 GPD2 LAMP2 METTL9 MGLL NCOA1 NFATC2IP PGS1 PPP1R12A PSD3 RABGAP1 YIPF6	BHLHB3 FDX1 GRPEL1 SLC7A11 TNIP2	RUTELLA_HEMATOGFSNDCS_DIFF	0	0	18
	ET743_SARCOMA_DN	ACSL3 CFLAR JMJD1C JMJD2B PRKCBP1 RABGAP1 TOP2A	UBE2D3	ET743_SARCOMA_DN	0	0	19
	ALZHEIMERS_INCIPIENT_UP	CEP350 CFLAR CROP FGFR3 GLI2 HRBL PLXNB2 RBBP6 SSH1 STAG2	F2R VRK3	ALZHEIMERS_INCIPIENT_UP	0	0	20
	TARTE_PLASMA_BLASTIC	MAPK1 RRM2 TOP2A	ABCE1 PSMA1 PWP1 UBE2D3	TARTE_PLASMA_BLASTIC	0	0	21
	BRCA_ER_NEG	ARHGAP21 ATAD2 CARHSP1 COL9A3 DERA FUS LAMP2 TPX2	BPI FDX1 ICAM1 PLEK SIRPG SNRPA1	BRCA_ER_NEG	0	0	22
	ET743_SARCOMA_72HRS_DN	ACSL3 CFLAR JMJD2B PRKCBP1 RABGAP1 TOP2A	UBE2D3	ET743_SARCOMA_72HRS_DN	0	0	23
	STEMCELL_COMMON_UP	DPH5 USP9X	CRTAP	STEMCELL_COMMON_UP	0	0	24
	UVB_NHEK1_C6	CLASP1 CNOT2 PPP1R12A PRKCBP1 TOP2A	OTUD4	UVB_NHEK1_C6	0	0	25
	MOREAUX_TACI_HI_VS_LOW_DN	IREB2 PAPD4 PPP1R12A	TATDN1 THYN1	MOREAUX_TACI_HI_VS_LOW_DN	0	0	26
	REOVIRUS_HEK293_UP	ABI2 FUS IREB2 KIAA1033 MKLN1 PCTK2 PITPNB TRPC1 USP9X	CREB5 OTUD4 RCHY1 ZNF330	REOVIRUS_HEK293_UP	0	0	27
	PENG_GLUTAMINE_UP	CABIN1 CDKN1C CLASP1 IGSF4 MEF2A PLXNB2 TOP2A TRIO	ITPR2 KATNB1 SPON1	PENG_GLUTAMINE_UP	0	0	28
	HSC_EARLYPROGENITORS_ADULT	ARMCX4 CLASP1 COMMD1 CSRP1 DPH5 EXOSC6 H2AFY MGAT5	ABCE1 DLAT FDX1 PPID SDAD1 SPN ZNF496	HSC_EARLYPROGENITORS_ADULT	0	0	29
	ET743_SARCOMA_48HRS_DN	CFLAR JMJD1C PRKCBP1 TOP2A	UBE2D3	ET743_SARCOMA_48HRS_DN	0	0	30
	HSC_EARLYPROGENITORS_FETAL	ARMCX4 CLASP1 COMMD1 CSRP1 DPH5 EXOSC6 H2AFY MGAT5	ABCE1 DLAT FDX1 PPID SDAD1 SPN ZNF496	HSC_EARLYPROGENITORS_FETAL	0	0	31
	HSC_EARLYPROGENITORS_SHARED	ARMCX4 CLASP1 COMMD1 CSRP1 DPH5 EXOSC6 H2AFY MGAT5	ABCE1 DLAT FDX1 PPID SDAD1 SPN ZNF496	HSC_EARLYPROGENITORS_SHARED	0	0	31
	SERUM_FIBROBLAST_CORE_DN	ACSL3 CDKN1C CST3 ECHDC2 OLFML2A PDK2	CRTAP	SERUM_FIBROBLAST_CORE_DN	0	0	33
	BREASTCA_TWO_CLASSES	ATP6AP1 DERA FGFR3 MAPK1 UBE2B		BREASTCA_TWO_CLASSES	0	0	34
	POD1_KO_DN	BTBD3 CDKN1C CFLAR GPD2 KIAA1033 LNPEP MGAT5 MGLL MKRN1 RANBP9 RASA2 RBBP6 RSN SOS2 STAG2 STARD8 TRPC1 TXNIP USP9X UTX WDFY1	PARVA TMEM33	POD1_KO_DN	0	0	35
	FLECHNER_KIDNEY_TRANSPLANT_WELL_UP	ABI1 ACSL3 BTBD3 CFLAR CROP IGFBP4 KIAA1033 LAMP2 SMG1	CA12 CBR4 COMT F2R HBB JTB LOC91316 PPID SRP72	FLECHNER_KIDNEY_TRANSPLANT_WELL_UP	0	0	36
	HDACI_COLON_SUL48HRS_UP	DNAJA4 MKLN1 SLC20A1 SMG1	ABCE1	HDACI_COLON_SUL48HRS_UP	0	0	37
	DIAB_NEPH_DN	ABI1 ACSL3 ATP6AP2 CDKN1C CFLAR CROP DDX17 ITGAV MGAT5 PLXNB2 SRGAP2 USP9X	F2R OTUD4 TOMM20	DIAB_NEPH_DN	0	0	38
	HDACI_COLON_BUT_DN	DDR1 FUS LAMP2 RBBP6 SESTD1	ABCE1 ARID1B GPR125 ITPR2 OTUD4 SLC37A4	HDACI_COLON_BUT_DN	0	0	39
	PENG_RAPAMYCIN_DN	PITPNB RBBP6 RTN4	HBB JTB SNRPA1	PENG_RAPAMYCIN_DN	0	0	40
	PENG_GLUTAMINE_DN	FUS PRKCBP1 RBBP6 SEC61B TXNIP	SNRPA1	PENG_GLUTAMINE_DN	0	0	41
	HADDAD_HPCLYMPHO_ENRICHED	DDR1 FMR1 GSDML JMJD1C KIAA1033 MEF2A MGAT5 PSD3 RRM2 TOP2A USP34	GPR125 LOC91316 PSPC1	HADDAD_HPCLYMPHO_ENRICHED	0	0	42
	MITOCHONDRIA	GPD2	ATP5I DLAT ETFDH FDX1 FXC1 MRPL48 TOMM20	MITOCHONDRIA	0	0	43
	VHL_NORMAL_UP	ARHGAP21 CFLAR DEXI OCRL TOP2A TPX2 UBE2B	HNRPD POFUT2 TOMM20	VHL_NORMAL_UP	0	0	44
	GH_GHRHR_KO_24HRS_DN	COMMD1 FMR1 GARNL1 ITGAV NCOA1	GRPEL1 LOC92345 TMEM33	GH_GHRHR_KO_24HRS_DN	0	0	45
	MYC_TARGETS			MYC_TARGETS	0	0	46
	HUMAN_MITODB_6_2002	GPD2	ATP5I DLAT ETFDH FDX1 MRPL48 PPID TOMM20	HUMAN_MITODB_6_2002	0	0	47
	KNUDSEN_PMNS_DN	ACVR1B AKT1 MTMR3 NCOA1 PHKA2 PPP1R12A		KNUDSEN_PMNS_DN	0	0	48
	BAF57_BT549_DN	H2AFY KIAA1622 MEF2A MXRA5 SPON2	ABCE1 ATP5I BDKRB1 CACYBP DLAT GRPEL1 HNRPD PAQR3 PWP1 SCC-112 SNRPA1 TMEM33	BAF57_BT549_DN	0	0	49
	FLECHNER_KIDNEY_TRANSPLANT_WELL_PBL_UP	LAMP2 MAGED1		FLECHNER_KIDNEY_TRANSPLANT_WELL_PBL_UP	0	0	50
Analysis of Functional Annotation Gene Ontology results: CL versus CLX
The first 50 MsigDB curated pathways (or less) catergories that were enriched (adjusted P-value less than 0.05) are reported for the comparison between CL and CLX, along with the genes esponsible for the enrichment (B-statistics more than 1.1 corresponding to a probability of differential expression greater than 0.75).
MsigC2v2_wCLsCLX.MsigC2v2.all: - Enriched Gene Sets - Bstat = 1.1 - Probability > 0.75026
	IDs	Genes_UP_Regulated_in_MsigC2v2_wCLsCLX.MsigC2v2.all	Genes_DW_Regulated_in_MsigC2v2_wCLsCLX.MsigC2v2.all	Description	Pval	BH-Pval	Rank
	FLECHNER_KIDNEY_TRANSPLANT_WELL_UP	ACSL3 DHX9 HSPA8 KIAA1033 LPGAT1 MARCKS MCL1 PIK3C2A PRKCI SMAD5 USP33	COL3A1 HBB HMGB2 LGALS1 NACA	FLECHNER_KIDNEY_TRANSPLANT_WELL_UP	0	0	1
	UVB_NHEK1_DN	CLASP1 KIAA0286 NFE2L2 PTPN3 RIF1 SMAD5	DIDO1 PIP5K2B	UVB_NHEK1_DN	0	0	1
	UVC_TTD_4HR_DN	CLASP1 EHBP1 RSN	FCHSD2	UVC_TTD_4HR_DN	0	0	1
	UVC_XPCS_8HR_DN	ACSL3 CASK CLASP1 EHBP1 KIAA1033 KIF5C OSBPL8 PIK3C2A PRKCI RAB6A RSN USP9X	FCHSD2	UVC_XPCS_8HR_DN	0	0	1
	UVC_XPCS_4HR_DN	ACSL3 EHBP1 RSN	FCHSD2	UVC_XPCS_4HR_DN	0	0	1
	STEMCELL_NEURAL_UP	ARHGAP21 ASPM CASK CNOT7 GALNT10 HMGCR HMGCS1 HSPA4 INCENP MARCKS RAP2B SFRS10 SQLE STIP1 SUV39H2 TPR USP9X	ATP5C1 DIDO1 HMGB2 LGALS1 NACA PELI1 PITPNB ROBO1	STEMCELL_NEURAL_UP	0	0	1
	UVC_TTD_ALL_DN	CASK CLASP1 EHBP1 RSN	FCHSD2	UVC_TTD_ALL_DN	0	0	1
	UVC_XPCS_ALL_DN	ACSL3 CASK CLASP1 EHBP1 KIAA1033 KIF5C OSBPL8 PIK3C2A PRKCI RAB6A RSN USP9X	FCHSD2	UVC_XPCS_ALL_DN	0	0	1
	UVC_TTD_8HR_DN	CASK EHBP1	FCHSD2	UVC_TTD_8HR_DN	0	0	9
	TAKEDA_NUP8_HOXA9_16D_DN	STK4	FCHSD2 IMMP2L PELI1 TNRC15	TAKEDA_NUP8_HOXA9_16D_DN	0	0	10
	ALZHEIMERS_DISEASE_UP	CASK DPF3 SMAD5 SUV39H2 USP33	FLJ21865 VRK3	ALZHEIMERS_DISEASE_UP	0	0	11
	RCC_NL_UP	ARHGAP21 DDEF1 EHBP1 HNRPU HSP90B1 HSPH1 MATR3 PTPLB RAB6A SQLE USP9X	HMGB2 IMMP2L	RCC_NL_UP	0	0	12
	UVC_HIGH_ALL_DN	HMGCR KIAA0256 MARCKS NFE2L2 SQLE	HMGB2 PITPNB	UVC_HIGH_ALL_DN	0	0	13
	STEMCELL_EMBRYONIC_UP	ASPM ATP1B1 CARS CASK CNOT7 FANCM HMGCR HMGCS1 HSPA4 RAP2A SFRS10 SQLE STIP1 SUV39H2 TPR USP33 USP9X	DIDO1 PITPNB ROBO1	STEMCELL_EMBRYONIC_UP	0	0	14
	UVC_TTD-XPCS_COMMON_DN	ACSL3 CASK CLASP1		UVC_TTD-XPCS_COMMON_DN	0	0	15
	LEE_TCELLS2_UP	ACAT2 ASPM CASC5 EPB41 HSPA4 IFI44 KIAA0286 MARCKS MCL1 NCBP1 OSBPL8 SAMHD1 SPATA13 SQLE STK4 WARS ZWILCH	AHI1 HMGB2 PHF15	LEE_TCELLS2_UP	0	0	16
	POD1_KO_DN	GALNT10 KIAA1033 MCL1 RSN SEPT11 TAOK1 TRIM23 USP33 USP9X WDFY1 ZFR	MBNL2 PIP5K2B	POD1_KO_DN	0	0	17
	ALZHEIMERS_DISEASE_DN	ACSL3 ATP1B1 CNOT7 GAP43 GRIA3 HSPA8 HSPH1 KIF5C MATR3 PRKCI RAB6A RSN USP33 USP9X	ATP5C1 COX6A1 HBB RNF5 ROBO1 SORCS3	ALZHEIMERS_DISEASE_DN	0	0	18
	ET743_SARCOMA_DN	ACSL3 ARHGEF2 EPB41 HSPA8 HSPH1 RAB6A RBM14		ET743_SARCOMA_DN	0	0	19
	HDACI_COLON_SUL_DN	DHX9 EPB41	HMGB2 MBNL2 NACA TMF1	HDACI_COLON_SUL_DN	0	0	20
	DIAB_NEPH_DN	ACSL3 HSP90B1 PRKCI SEPT11 TRIM23 USP9X WARS	COL3A1	DIAB_NEPH_DN	0	0	21
	STEMCELL_HEMATOPOIETIC_UP	ARHGAP21 ARHGEF2 CARS CNOT7 EIF1 EPB41 HSPA4 NFYA SAMHD1 SPATA13 USP9X WARS ZFR	ENG PELI1 VRK3	STEMCELL_HEMATOPOIETIC_UP	0	0	22
	UVB_NHEK1_C6	CLASP1	PIP5K2B	UVB_NHEK1_C6	0	0	23
	FSH_OVARY_MCV152_DN	RAB6A	PITPNB	FSH_OVARY_MCV152_DN	0	0	24
	AGEING_BRAIN_DN	LOC552889 RAB6A RAP2A	MBNL2 PITPNB	AGEING_BRAIN_DN	0	0	25
	HDACI_COLON_BUT_DN	ARHGEF2 DHX9 RAB6A	HMGB2 MBNL2	HDACI_COLON_BUT_DN	0	0	26
	RUTELLA_HEMATOGFSNDCS_DIFF	ACSL3 MARCKS MCL1 SLC1A2 SLC7A11 SQLE	CCL18 FCHSD2 PELI1 ROBO1	RUTELLA_HEMATOGFSNDCS_DIFF	0	0	27
	SERUM_FIBROBLAST_CORE_DN	ACSL3 HMGCS1 OSBPL8 RNF146 SEPT11 SESN2 SQLE	DPP7	SERUM_FIBROBLAST_CORE_DN	0	0	28
	HSC_MATURE_ADULT	HECTD1 SLC7A11	ALAS2	HSC_MATURE_ADULT	0	0	29
	HADDAD_HPCLYMPHO_ENRICHED	KIAA0256 KIAA1033	HMGB2 PHF15	HADDAD_HPCLYMPHO_ENRICHED	0	0	30
	ET743_SARCOMA_72HRS_DN	ACSL3 ARHGEF2 EPB41 HSPA8 HSPH1 RBM14		ET743_SARCOMA_72HRS_DN	0	0	31
	CMV_HCMV_TIMECOURSE_ALL_UP	CASK GAP43 PTPN3 SAMHD1 STIP1 TRIM23	NR4A1 OVGP1 TMF1	CMV_HCMV_TIMECOURSE_ALL_UP	0	0	32
	REOVIRUS_HEK293_UP	DHX9 KIAA0256 KIAA1033 SAMHD1 SHOX2 SMAD5 USP9X	PITPNB	REOVIRUS_HEK293_UP	0	0	33
	O6BG_RESIST_MEDULLOBLASTOMA_DN			O6BG_RESIST_MEDULLOBLASTOMA_DN	0	0	34
	CHOLESTEROL_BIOSYNTHESIS	HMGCR HMGCS1 SQLE		CHOLESTEROL_BIOSYNTHESIS	0	0	35
	VHL_NORMAL_UP	ARHGAP21 DDEF1 EHBP1 HSP90B1 HSPH1 LOC552889 PTPLB SQLE	DIDO1 HMGB2	VHL_NORMAL_UP	0	0	36
	BRCA1KO_MEF_DN	GPT2 NFE2L2 ZFR	COL3A1	BRCA1KO_MEF_DN	0	0	37
	CHEN_HOXA5_TARGETS_UP	CARS CHAC1 MCL1	PELI1 ZNF331	CHEN_HOXA5_TARGETS_UP	0	0	38
	IDX_TSA_DN_CLUSTER5	MARCKS SHOX2	COL3A1	IDX_TSA_DN_CLUSTER5	0	0	39
	GH_GHRHR_KO_24HRS_DN	SFRS10		GH_GHRHR_KO_24HRS_DN	0	0	40
	HUMAN_CD34_ENRICHED_TRANSCRIPTION_FACTORS	CNOT7 NFYA SHOX2	RNF5	HUMAN_CD34_ENRICHED_TRANSCRIPTION_FACTORS	0	0	41
	KNUDSEN_PMNS_DN	DHX9	HMGB2	KNUDSEN_PMNS_DN	0	0	42
	HDACI_COLON_BUT48HRS_DN	ARHGEF2 RAB6A	HMGB2	HDACI_COLON_BUT48HRS_DN	0	0	43
	ET743_SARCOMA_48HRS_DN	EPB41 HSPA8 HSPH1 RBM14		ET743_SARCOMA_48HRS_DN	0	0	44
	SIG_INSULIN_RECEPTOR_PATHWAY_IN_CARDIAC_MYOCYTES	AKT2		SIG_INSULIN_RECEPTOR_PATHWAY_IN_CARDIAC_MYOCYTES	0	0	45
	HDACI_COLON_SUL48HRS_DN	DHX9 EPB41		HDACI_COLON_SUL48HRS_DN	0	0	46
	CHANG_SERUM_RESPONSE_DN	HMGCS1 OSBPL8 SQLE	DPP7	CHANG_SERUM_RESPONSE_DN	0	0	47
	HSC_LATEPROGENITORS_ADULT	CHAC1 DDEF1 ESCO2 GALNT10	HMGB2 PITPNB	HSC_LATEPROGENITORS_ADULT	0	0	48
	MMS_MOUSE_LYMPH_HIGH_4HRS_UP		PELI1	MMS_MOUSE_LYMPH_HIGH_4HRS_UP	0	0	49
	ST_PHOSPHOINOSITIDE_3_KINASE_PATHWAY	AKT2		ST_PHOSPHOINOSITIDE_3_KINASE_PATHWAY	0	0	50

## Sheet: supplTABLE G
SUPPLEMENTARY TABLE G
logFC: logarithmic transformation (base 2) of the fold-change compared to the normal lung group
BC: barcode pre-processing on the aggregated data set
XG: primary xenograft group
CL: cell line group
CLX: secondary xenograft group
SCLC: primary small cell lung cancer group
NORM: normal lung group
Gene changing in SCLC, XG, CL and CLX compared to NORMAL in both analyses, with/without barcode preprocessing (adjusted P-value < 10E-6).
				logFC	logFC	logFC	logFC	logFC.BC	logFC.BC	logFC.BC	logFC.BC
ENTREZ	Probe Set	SYMBOL	GENENAME	SCLCvsNORM	XGvsNORM	CLvsNORM	CLXvsNORM	SCLCvsNORM.BC	XGvsNORM.BC	CLvsNORM.BC	CLXvsNORM.BC
10643	203820_s_at	IGF2BP3	insulin-like growth factor 2 mRNA binding protein 3	1.76	5.63	5.85	5.8	2.31	5.95	6	6.07
3832	204444_at	KIF11	kinesin family member 11	2.42	4.6	4.4	4.43	2.93	4.98	4.66	4.75
6790	208079_s_at	AURKA	aurora kinase A	2.49	4.37	4.37	4.32	2.64	4.9	4.79	4.82
10403	204162_at	NDC80	NDC80 homolog, kinetochore complex component (S. cerevisiae)	2.69	4.43	4.24	4.17	3.04	5.13	4.95	4.8
7345	201387_s_at	UCHL1	ubiquitin carboxyl-terminal esterase L1 (ubiquitin thiolesterase)	4.3	4.19	4.31	4.24	3.99	4.62	5.13	4.97
1058	204962_s_at	CENPA	centromere protein A	2.78	4.4	4.18	4.15	3.23	4.89	4.52	4.61
11130	204026_s_at	ZWINT	ZW10 interactor	4.18	4.22	3.83	3.96	3.96	4.76	4.18	4.29
4436	209421_at	MSH2	mutS homolog 2, colon cancer, nonpolyposis type 1 (E. coli)	2.09	4.15	4.12	4.04	2.08	4.4	4.34	4.21
22974	210052_s_at	TPX2	TPX2, microtubule-associated, homolog (Xenopus laevis)	3.48	4.29	3.87	3.76	3.42	5.21	4.57	4.4
10606	201013_s_at	PAICS	phosphoribosylaminoimidazole carboxylase, phosphoribosylaminoimidazole succinocarboxamide synthetase	2.1	3.23	3.97	4.02	1.85	4.3	5.53	5.23
1029	207039_at	CDKN2A	cyclin-dependent kinase inhibitor 2A (melanoma, p16, inhibits CDK4)	1.95	3.99	3.91	3.84	2.54	4.57	4.32	4.3
8936	204165_at	WASF1	WAS protein family, member 1	1.72	3.18	3.73	3.59	2.06	4.49	5.03	4.97
8317	204510_at	CDC7	cell division cycle 7 homolog (S. cerevisiae)	3.02	3.48	3.59	3.71	2.39	4.05	4.09	4.29
5427	205909_at	POLE2	polymerase (DNA directed), epsilon 2 (p59 subunit)	2.03	3.61	3.33	3.41	1.8	4.01	3.71	3.75
3925	200783_s_at	STMN1	stathmin 1/oncoprotein 18	2.51	3.97	3.42	3.39	2.85	3.99	3.46	3.51
1063	209172_s_at	CENPF	centromere protein F, 350/400ka (mitosin)	2.92	3.42	3.45	3.3	1.98	5.64	5.32	5.36
9212	209464_at	AURKB	aurora kinase B	2	3.39	4.12	3.93	2.45	2.86	3.54	3.47
23421	205176_s_at	ITGB3BP	integrin beta 3 binding protein (beta3-endonexin)	2.29	3.45	3.12	3.33	1.93	3.62	3.33	3.61
10797	201761_at	MTHFD2	methylenetetrahydrofolate dehydrogenase (NADP+ dependent) 2, methenyltetrahydrofolate cyclohydrolase	2.09	2.99	3.5	3.42	1.97	3.23	3.64	3.59
10038	214086_s_at	PARP2	poly (ADP-ribose) polymerase family, member 2	1.4	3.41	3.11	3.23	1.24	3.91	3.51	3.7
2237	204767_s_at	FEN1	flap structure-specific endonuclease 1	3	3.12	3.31	3.11	2.95	3.53	3.78	3.57
4830	201577_at	NME1	non-metastatic cells 1, protein (NM23A) expressed in	1.78	2.57	3.37	3.31	1.35	3.07	3.91	3.82
9631	206550_s_at	NUP155	nucleoporin 155kDa	1.58	3.12	3.24	3.39	1.72	3.29	3.22	3.12
5591	208694_at	PRKDC	protein kinase, DNA-activated, catalytic polypeptide	1.71	3.31	3.02	3.24	1.67	3.68	3.12	3.2
890	203418_at	CCNA2	cyclin A2	1.53	2.91	3.5	3.23	2.27	3.07	3.92	3.68
191	200903_s_at	AHCY	S-adenosylhomocysteine hydrolase	1.24	3.12	3.07	3.25	0.88	3.09	2.89	3.27
7371	209825_s_at	UCK2	uridine-cytidine kinase 2	1.34	2.56	3.53	3.35	1.5	2.8	3.71	3.73
11073	202633_at	TOPBP1	topoisomerase (DNA) II binding protein 1	2.32	3.17	2.81	2.89	1.72	3.74	3.34	3.27
3161	209709_s_at	HMMR	hyaluronan-mediated motility receptor (RHAMM)	1.71	2.98	2.83	2.43	2.35	4.28	3.9	3.79
8914	203046_s_at	TIMELESS	timeless homolog (Drosophila)	2.67	3.02	2.18	2.39	1.97	4.1	3.15	3.38
7398	202413_s_at	USP1	ubiquitin specific peptidase 1	2.16	2.91	2.69	2.72	2.56	4.77	4.49	4.61
5422	204835_at	POLA1	polymerase (DNA directed), alpha 1	1.6	3.03	2.67	2.56	1.23	3.41	2.99	2.79
1062	205046_at	CENPE	centromere protein E, 312kDa	1.8	2.22	2.61	2.78	1.78	2.73	3.18	3.34
10535	203022_at	RNASEH2A	ribonuclease H2, subunit A	2.07	2.79	2.5	2.5	2.45	3.61	3.1	3.22
6491	205339_at	STIL	SCL/TAL1 interrupting locus	2.07	2.59	2.62	2.4	1.72	3.29	3.25	3.16
55353	208029_s_at	LAPTM4B	lysosomal associated protein transmembrane 4 beta	1.84	2.42	2.41	2.51	2.67	2.92	3.31	3.22
10733	204887_s_at	PLK4	polo-like kinase 4 (Drosophila)	1.2	2.55	2.65	2.69	1.19	2.52	2.57	2.64
7411	201472_at	VBP1	von Hippel-Lindau binding protein 1	1.38	2.49	2.51	2.33	0.98	3.04	2.93	2.85
2956	202911_at	MSH6	mutS homolog 6 (E. coli)	1.81	2.48	2.33	2.38	2.29	3.94	3.96	3.66
4522	202309_at	MTHFD1	methylenetetrahydrofolate dehydrogenase (NADP+ dependent) 1, methenyltetrahydrofolate cyclohydrolase, formyltetrahydrofolate synthetase	1.22	2.46	2.29	2.27	1.18	2.98	2.84	2.86
6636	203832_at	SNRPF	small nuclear ribonucleoprotein polypeptide F	1.2	2.45	2.44	2.37	1.21	2.41	2.36	2.33
5217	204992_s_at	PFN2	profilin 2	2.21	2.2	2.34	1.94	2.27	2.73	2.78	2.57
9700	38158_at	ESPL1	extra spindle pole bodies homolog 1 (S. cerevisiae)	2.44	2.09	1.84	1.91	2.88	2.64	2.23	2.32
7913	200934_at	DEK	DEK oncogene (DNA binding)	1.62	2.24	1.98	2.07	1.59	2.71	2.51	2.46
142	208644_at	PARP1	poly (ADP-ribose) polymerase family, member 1	1.43	2.35	2.11	2.3	1.64	2.13	1.82	2.14
23649	204441_s_at	POLA2	polymerase (DNA directed), alpha 2 (70kD subunit)	0.81	2.51	1.89	1.75	0.96	2.97	2.28	2.19
52	201630_s_at	ACP1	acid phosphatase 1, soluble	0.7	1.84	1.66	1.81	2.06	2.7	3	2.99
4841	200057_s_at	NONO	non-POU domain containing, octamer-binding	0.94	1.67	1.27	1.22	2.15	3.34	2.95	2.76
10038	204752_x_at	PARP2	poly (ADP-ribose) polymerase family, member 2	1.42	1.87	1.66	1.71	1.24	3.91	3.51	3.7
10038	215773_x_at	PARP2	poly (ADP-ribose) polymerase family, member 2	1.48	1.77	1.57	1.62	1.24	3.91	3.51	3.7
3151	208668_x_at	HMGN2	high-mobility group nucleosomal binding domain 2	1.29	1.54	1.38	1.19	1.44	1.73	1.53	1.32
8809	206618_at	IL18R1	interleukin 18 receptor 1	-1.04	-1.47	-1.38	-1.54	-1.16	-1.88	-2.16	-2.07
10578	37145_at	GNLY	granulysin	-1.17	-1.91	-1.82	-1.75	-1.34	-2.55	-2.37	-2.53
3791	203934_at	KDR	kinase insert domain receptor (a type III receptor tyrosine kinase)	-1.43	-1.96	-1.76	-1.86	-1.47	-3.16	-3.16	-3.06
2662	206159_at	GDF10	growth differentiation factor 10	-0.98	-1.85	-1.99	-1.5	-1.63	-2.45	-2.49	-2.53
3290	205404_at	HSD11B1	hydroxysteroid (11-beta) dehydrogenase 1	-0.87	-1.78	-1.97	-1.87	-1.08	-2.74	-2.78	-2.63
1441	203591_s_at	CSF3R	colony stimulating factor 3 receptor (granulocyte)	-1.41	-1.9	-1.91	-1.99	-1.27	-2.67	-2.52	-2.6
7318	1294_at	UBA7	ubiquitin-like modifier activating enzyme 7	-0.78	-1.99	-1.93	-1.81	-1.29	-2.99	-2.66	-2.83
3937	205269_at	LCP2	lymphocyte cytosolic protein 2 (SH2 domain containing leukocyte protein of 76kDa)	-1.54	-2.02	-1.95	-1.95	-1.44	-2.86	-2.87	-2.87
5348	205384_at	FXYD1	FXYD domain containing ion transport regulator 1 (phospholemman)	-1.97	-1.9	-2.12	-1.79	-1.79	-2.58	-2.6	-2.2
9473	207571_x_at	C1orf38	chromosome 1 open reading frame 38	-1.58	-2.11	-1.86	-2.02	-1.44	-2.8	-2.84	-2.9
745	204073_s_at	C11orf9	chromosome 11 open reading frame 9	-1.61	-2	-2.06	-2.13	-1.4	-2.56	-2.3	-2.77
7466	202908_at	WFS1	Wolfram syndrome 1 (wolframin)	-1.3	-2.06	-2.17	-2	-1.76	-2.62	-2.58	-2.43
1842	206101_at	ECM2	extracellular matrix protein 2, female organ and adipocyte specific	-1.26	-2.03	-2.04	-2.28	-1.21	-2.88	-3.22	-3.14
3570	205945_at	IL6R	interleukin 6 receptor	-1.22	-2.11	-2.24	-2.15	-1.45	-2.68	-2.5	-2.5
3914	209270_at	LAMB3	laminin, beta 3	-1.26	-1.73	-2.46	-1.96	-1.13	-2.44	-2.69	-2.52
2328	40665_at	FMO3	flavin containing monooxygenase 3	-1.73	-2.18	-2.21	-2.32	-1.91	-2.85	-2.88	-3.02
10791	204929_s_at	VAMP5	vesicle-associated membrane protein 5 (myobrevin)	-1.95	-2.62	-2.24	-2.29	-1.38	-2.68	-2.34	-2.49
834	211367_s_at	CASP1	caspase 1, apoptosis-related cysteine peptidase (interleukin 1, beta, convertase)	-1.23	-2.09	-1.88	-2.05	-2.55	-3.75	-3.35	-3.54
3373	210619_s_at	HYAL1	hyaluronoglucosaminidase 1	-1.56	-2.95	-2.33	-2.34	-1.97	-3.33	-2.31	-2.42
3913	216264_s_at	LAMB2	laminin, beta 2 (laminin S)	-1.62	-2.26	-2.36	-2.38	-1.58	-2.94	-3.1	-2.95
4091	207069_s_at	SMAD6	SMAD family member 6	-1.96	-2.34	-2.12	-2.12	-2.41	-3.06	-2.81	-2.95
3587	204912_at	IL10RA	interleukin 10 receptor, alpha	-1.38	-2.43	-2.63	-2.37	-1.69	-2.4	-2.57	-2.39
1509	200766_at	CTSD	cathepsin D	-1.4	-2.44	-2.41	-2.37	-1.14	-2.68	-2.61	-2.55
3431	208012_x_at	SP110	SP110 nuclear body protein	-1.13	-2.49	-2.41	-2.32	-1.19	-2.94	-3.05	-2.7
23645	37028_at	PPP1R15A	protein phosphatase 1, regulatory (inhibitor) subunit 15A	-1.64	-2.88	-2.56	-2.67	-1.79	-2.68	-2.25	-2.5
3384	204683_at	ICAM2	intercellular adhesion molecule 2	-1.49	-2.73	-2.21	-2.35	-2.33	-4.41	-3.49	-3.63
951	204192_at	CD37	CD37 molecule	-1.7	-2.48	-2.6	-2.33	-1.36	-3.65	-3.29	-3.26
6376	203687_at	CX3CL1	chemokine (C-X3-C motif) ligand 1	-1.4	-2.62	-2.47	-2.26	-2.2	-4.09	-3.92	-3.97
6366	204606_at	CCL21	chemokine (C-C motif) ligand 21	-1.32	-2.79	-2.51	-2.84	-1.32	-2.83	-2.45	-2.62
1839	38037_at	HBEGF	heparin-binding EGF-like growth factor	-1.77	-2.34	-2.14	-2.05	-2.8	-3.29	-2.81	-2.84
5740	208131_s_at	PTGIS	prostaglandin I2 (prostacyclin) synthase	-1.9	-2.5	-3.1	-2.63	-2.15	-2.54	-2.89	-2.76
6909	40560_at	TBX2	T-box 2	-1.7	-2.73	-2.59	-2.59	-1.16	-3.73	-3.6	-3.35
9961	202180_s_at	MVP	major vault protein	-1.47	-2.16	-2.63	-3.05	-1.78	-2.7	-3	-2.95
2217	218831_s_at	FCGRT	Fc fragment of IgG, receptor, transporter, alpha	-0.94	-2.41	-3	-2.83	-1.32	-2.64	-3.24	-3.02
2328	206496_at	FMO3	flavin containing monooxygenase 3	-1.19	-2.83	-2.54	-2.68	-1.91	-2.85	-2.88	-3.02
7148	208609_s_at	TNXB	tenascin XB	-2.75	-2.48	-2.13	-2.27	-2.77	-3.84	-3.51	-3.5
3055	208018_s_at	HCK	hemopoietic cell kinase	-1.75	-2.66	-2.8	-2.98	-2.34	-2.81	-2.96	-2.96
4129	204041_at	MAOB	monoamine oxidase B	-1.27	-2.33	-3.16	-2.75	-2.07	-2.88	-3.47	-3.01
3684	205786_s_at	ITGAM	integrin, alpha M (complement component 3 receptor 3 subunit)	-1.89	-2.84	-2.79	-2.74	-1.22	-3.35	-3.14	-3.2
602	204908_s_at	BCL3	B-cell CLL/lymphoma 3	-2.1	-2.82	-2.67	-2.84	-1.54	-3.87	-3.69	-3.91
6867	200911_s_at	TACC1	transforming, acidic coiled-coil containing protein 1	-1.47	-2.55	-2.82	-2.87	-1.31	-3.76	-3.78	-3.9
4481	214770_at	MSR1	macrophage scavenger receptor 1	-2.46	-2.81	-2.88	-2.75	-2.45	-3.08	-3.48	-3.38
6503	203761_at	SLA	Src-like-adaptor	-1.01	-2.82	-2.9	-2.95	-1.63	-2.95	-2.81	-2.89
645	202201_at	BLVRB	biliverdin reductase B (flavin reductase (NADPH))	-1.51	-2.66	-2.93	-2.8	-1.74	-2.93	-3.32	-3.16
10875	204834_at	FGL2	fibrinogen-like 2	-1.39	-2.83	-2.91	-2.84	-1.74	-3.93	-4.02	-3.97
10203	206331_at	CALCRL	calcitonin receptor-like	-1.22	-3.5	-3.11	-3.12	-1.78	-2.96	-2.48	-2.81
6237	212647_at	RRAS	related RAS viral (r-ras) oncogene homolog	-1.5	-2.89	-2.91	-2.76	-2.66	-4.03	-3.83	-3.86
51090	204519_s_at	PLLP	plasma membrane proteolipid (plasmolipin)	-2.34	-2.78	-2.94	-2.96	-2.08	-3.82	-4	-4.36
3659	202531_at	IRF1	interferon regulatory factor 1	-1.2	-2.74	-3.29	-3.04	-1.29	-2.94	-3.52	-3.22
4973	210004_at	OLR1	oxidized low density lipoprotein (lectin-like) receptor 1	-2.55	-2.95	-2.9	-2.73	-3.03	-3.42	-3.53	-3.37
6352	1405_i_at	CCL5	chemokine (C-C motif) ligand 5	-1.49	-3.07	-2.91	-3	-1.77	-5.01	-4.92	-4.84
7177	217023_x_at	TPSAB1	tryptase alpha/beta 1	-1.87	-2.84	-3.12	-2.87	-3.09	-5.09	-4.8	-4.72
2615	203835_at	LRRC32	leucine rich repeat containing 32	-1.39	-3.11	-3.12	-2.95	-1.37	-3.82	-3.74	-3.71
8741	209499_x_at	TNFSF13	tumor necrosis factor (ligand) superfamily, member 13	-1.58	-3.1	-3.13	-3.08	-2.26	-4.52	-4.32	-4.55
8685	205819_at	MARCO	macrophage receptor with collagenous structure	-3.46	-3.35	-3.07	-2.89	-2.9	-3.61	-3.23	-3.07
4332	204959_at	MNDA	myeloid cell nuclear differentiation antigen	-2.02	-3.25	-2.98	-3.08	-2.9	-4.07	-3.85	-3.79
9235	203828_s_at	IL32	interleukin 32	-1.92	-3.33	-3.05	-3.09	-1.47	-4.01	-3.92	-3.61
7433	205019_s_at	VIPR1	vasoactive intestinal peptide receptor 1	-1.77	-3.2	-3.29	-3.42	-2.92	-3.4	-3.52	-3.37
1755	208250_s_at	DMBT1	deleted in malignant brain tumors 1	-2.18	-3.42	-3.24	-3.14	-1.66	-4.14	-3.95	-3.83
4681	37005_at	NBL1	neuroblastoma, suppression of tumorigenicity 1	-1.26	-3.12	-3.27	-3.44	-1.4	-3.5	-3.6	-3.65
5743	204748_at	PTGS2	prostaglandin-endoperoxide synthase 2 (prostaglandin G/H synthase and cyclooxygenase)	-2.71	-3.36	-3.38	-3.23	-3.04	-4.08	-4.18	-3.91
6362	32128_at	CCL18	chemokine (C-C motif) ligand 18 (pulmonary and activation-regulated)	-2.63	-3.38	-3.15	-3.38	-1.84	-3.98	-3.73	-3.67
6352	204655_at	CCL5	chemokine (C-C motif) ligand 5	-1.44	-3.46	-3.31	-3.43	-1.77	-5.01	-4.92	-4.84
2162	203305_at	F13A1	coagulation factor XIII, A1 polypeptide	-1.89	-3.35	-3.54	-3.21	-1.65	-3.88	-4.17	-3.86
6376	823_at	CX3CL1	chemokine (C-X3-C motif) ligand 1	-2.47	-3.51	-3.41	-3.37	-2.2	-4.09	-3.92	-3.97
2022	201809_s_at	ENG	endoglin (Osler-Rendu-Weber syndrome 1)	-1.63	-3.55	-3.37	-3.34	-2.41	-4.37	-4.04	-4.17
3910	202202_s_at	LAMA4	laminin, alpha 4	-1.62	-3.54	-3.41	-3.42	-2.04	-3.84	-3.88	-3.97
1909	204464_s_at	EDNRA	endothelin receptor type A	-2.31	-3.45	-3.56	-3.04	-2.31	-4.35	-4.18	-4.03
7010	206702_at	TEK	TEK tyrosine kinase, endothelial (venous malformations, multiple cutaneous and mucosal)	-2.89	-3.4	-3.52	-3.52	-2.16	-3.95	-4.04	-3.94
10351	204719_at	ABCA8	ATP-binding cassette, sub-family A (ABC1), member 8	-3.49	-3.16	-3.53	-3.71	-3.53	-3.44	-3.66	-4.08
7177	215382_x_at	TPSAB1	tryptase alpha/beta 1	-2.45	-3.54	-3.54	-3.44	-3.09	-5.09	-4.8	-4.72
6943	204931_at	TCF21	transcription factor 21	-3.32	-3.36	-3.34	-3.46	-3.64	-4.11	-4.01	-4.31
2294	205935_at	FOXF1	forkhead box F1	-2.41	-3.76	-3.37	-3.25	-2.79	-4.19	-3.96	-3.99
6515	202499_s_at	SLC2A3	solute carrier family 2 (facilitated glucose transporter), member 3	-2	-3.53	-3.42	-3.63	-2.05	-4.66	-4.52	-4.89
976	202910_s_at	CD97	CD97 molecule	-2.47	-3.63	-3.63	-3.61	-2.32	-4.21	-4.02	-4.13
3569	205207_at	IL6	interleukin 6 (interferon, beta 2)	-2.71	-3.67	-3.66	-3.65	-3.25	-3.95	-3.85	-3.93
8991	214433_s_at	SELENBP1	selenium binding protein 1	-3.1	-3.4	-3.53	-3.82	-2.4	-3.96	-4.46	-4.43
4638	202555_s_at	MYLK	myosin light chain kinase	-2.21	-3.38	-3.87	-3.64	-2.65	-3.73	-4.39	-3.91
3109	203932_at	HLA-DMB	major histocompatibility complex, class II, DM beta	-1.46	-3.8	-3.56	-3.62	-1.25	-4.02	-3.86	-3.91
4616	209304_x_at	GADD45B	growth arrest and DNA-damage-inducible, beta	-2.33	-3.75	-3.62	-3.67	-2.7	-5.13	-5.04	-5.01
4053	204682_at	LTBP2	latent transforming growth factor beta binding protein 2	-1.22	-3.55	-4.08	-3.92	-1.42	-3.79	-4.07	-3.74
8639	204894_s_at	AOC3	amine oxidase, copper containing 3 (vascular adhesion protein 1)	-3.23	-3.83	-3.68	-3.71	-3.24	-3.88	-3.84	-3.94
5788	212588_at	PTPRC	protein tyrosine phosphatase, receptor type, C	-2.07	-3.68	-3.88	-3.58	-2.7	-5.28	-5.39	-5.5
730	202992_at	C7	complement component 7	-3.08	-3.65	-3.68	-3.89	-3.65	-4.85	-4.85	-5.01
2348	204437_s_at	FOLR1	folate receptor 1 (adult)	-3.21	-3.86	-3.78	-3.48	-3.13	-4.41	-4.36	-4
11067	209183_s_at	C10orf10	chromosome 10 open reading frame 10	-2.33	-3.84	-3.79	-3.84	-2.32	-4.3	-4.27	-4.19
11197	204712_at	WIF1	WNT inhibitory factor 1	-3.4	-3.89	-3.79	-3.72	-4.05	-4.19	-3.96	-4.02
306	209369_at	ANXA3	annexin A3	-3.52	-4.1	-3.86	-3.58	-3.6	-5.01	-4.1	-4.04
1052	203973_s_at	CEBPD	CCAAT/enhancer binding protein (C/EBP), delta	-1.89	-4.08	-3.84	-3.76	-2.47	-4.56	-4.24	-4.16
710	200986_at	SERPING1	serpin peptidase inhibitor, clade G (C1 inhibitor), member 1, (angioedema, hereditary)	-2.24	-4.03	-3.93	-3.51	-2.02	-4.99	-5.07	-4.54
54	204638_at	ACP5	acid phosphatase 5, tartrate resistant	-1.23	-3.98	-3.99	-4.1	-1.74	-4.24	-4.23	-4.1
7177	210084_x_at	TPSAB1	tryptase alpha/beta 1	-2.53	-4.13	-3.85	-3.97	-3.09	-5.09	-4.8	-4.72
715	212067_s_at	C1R	complement component 1, r subcomponent	-1.52	-4.03	-3.89	-4.1	-2.01	-4.35	-4.32	-4.44
11326	204787_at	VSIG4	V-set and immunoglobulin domain containing 4	-2.2	-3.96	-4.11	-4.02	-1.98	-5.31	-5.17	-5.13
3075	213800_at	CFH	complement factor H	-2.37	-4.02	-4.11	-3.89	-2.16	-4.32	-4.3	-4.34
1848	208892_s_at	DUSP6	dual specificity phosphatase 6	-2.66	-3.5	-4.15	-4.55	-3.33	-4.16	-4.74	-4.99
7177	205683_x_at	TPSAB1	tryptase alpha/beta 1	-2.79	-4.21	-4.12	-4.16	-3.09	-5.09	-4.8	-4.72
7177	216474_x_at	TPSAB1	tryptase alpha/beta 1	-2.51	-4.23	-4.19	-4.04	-3.09	-5.09	-4.8	-4.72
2207	204232_at	FCER1G	Fc fragment of IgE, high affinity I, receptor for; gamma polypeptide	-1.57	-4.6	-4.72	-4.3	-2.02	-4.41	-4.61	-4.21
7052	201042_at	TGM2	transglutaminase 2 (C polypeptide, protein-glutamine-gamma-glutamyltransferase)	-2.83	-4.33	-4.36	-4.41	-2.68	-4.48	-4.57	-4.66
1066	209616_s_at	CES1	carboxylesterase 1 (monocyte/macrophage serine esterase 1)	-2.92	-4.58	-4.24	-4.16	-3.64	-5.07	-4.66	-4.67
11170	209074_s_at	FAM107A	family with sequence similarity 107, member A	-3.35	-4.42	-4.33	-4.58	-3.11	-5.1	-4.72	-4.92
9052	203108_at	GPRC5A	G protein-coupled receptor, family C, group 5, member A	-2.4	-4.46	-4.52	-4.49	-3.41	-4.9	-5.21	-5.15
1675	205382_s_at	CFD	complement factor D (adipsin)	-3.83	-4.58	-4.48	-4.21	-3.95	-5.27	-5.07	-4.59
1043	34210_at	CD52	CD52 molecule	-3.61	-4.44	-4.43	-4.75	-3.63	-5.55	-5.31	-5.76
4616	207574_s_at	GADD45B	growth arrest and DNA-damage-inducible, beta	-2.98	-4.43	-4.5	-4.72	-2.7	-5.13	-5.04	-5.01
6275	203186_s_at	S100A4	S100 calcium binding protein A4	-2.65	-4.53	-4.68	-4.55	-3.35	-4.78	-4.98	-5.07
358	209047_at	AQP1	aquaporin 1 (Colton blood group)	-2.56	-4.77	-5.32	-4.06	-3.33	-5.72	-6.09	-4.77
2167	203980_at	FABP4	fatty acid binding protein 4, adipocyte	-4.34	-4.75	-4.81	-4.6	-4.47	-5.54	-5.45	-5.41
3133	200904_at	HLA-E	major histocompatibility complex, class I, E	-2.42	-4.87	-4.8	-4.8	-2.36	-5.74	-5.42	-5.52
177	210081_at	AGER	advanced glycosylation end product-specific receptor	-4.55	-4.62	-4.91	-4.86	-4.25	-5.22	-5.55	-5.18
1555	206754_s_at	CYP2B6	cytochrome P450, family 2, subfamily B, polypeptide 6	-2.58	-5.02	-4.88	-4.96	-3.56	-5.7	-5.63	-5.5
5175	208982_at	PECAM1	platelet/endothelial cell adhesion molecule (CD31 antigen)	-2.19	-5.05	-5.16	-5.04	-2.69	-5.61	-5.67	-5.8
7305	204122_at	TYROBP	TYRO protein tyrosine kinase binding protein	-2.18	-5.06	-4.51	-5.25	-2.53	-6.06	-5.43	-5.95
713	202953_at	C1QB	complement component 1, q subcomponent, B chain	-1.81	-4.96	-5.3	-5.12	-2	-5.55	-5.89	-5.68
1580	210096_at	CYP4B1	cytochrome P450, family 4, subfamily B, polypeptide 1	-3.85	-5.06	-5.28	-5.28	-3.05	-6.4	-6.66	-6.47
4360	204438_at	MRC1	mannose receptor, C type 1	-4.02	-5.32	-5.29	-5.27	-4.44	-6.23	-6.12	-6.28
125	209613_s_at	ADH1B	alcohol dehydrogenase 1B (class I), beta polypeptide	-4.95	-5.39	-5.31	-5.28	-5.26	-6.14	-6.06	-6.2
8743	202688_at	TNFSF10	tumor necrosis factor (ligand) superfamily, member 10	-2.76	-5.52	-5.41	-5.19	-3.39	-6.45	-6.43	-6.15
3115	201137_s_at	HLA-DPB1	major histocompatibility complex, class II, DP beta 1	-2.12	-5.58	-5.73	-5.34	-2.08	-6.23	-6.18	-6.13
3127	204670_x_at	HLA-DRB5	major histocompatibility complex, class II, DR beta 5	-1.56	-5.99	-6.21	-5.82	-2.38	-5.98	-5.84	-5.39
3123	209312_x_at	HLA-DRB1	major histocompatibility complex, class II, DR beta 1	-2.06	-5.99	-6.53	-6	-3.38	-5.9	-5.95	-5.48
6439	37004_at	SFTPB	surfactant, pulmonary-associated protein B	-4.21	-5.83	-5.85	-6.03	-4.54	-6.63	-6.49	-6.52
6440	38691_s_at	SFTPC	surfactant, pulmonary-associated protein C	-4.16	-6	-5.93	-5.88	-4.79	-7.66	-7.36	-7.28
7805	201721_s_at	LAPTM5	lysosomal associated multispanning membrane protein 5	-1.79	-5.62	-6	-6.11	-2.16	-6.1	-6.11	-6.03
3043	217232_x_at	HBB	hemoglobin, beta	-3.4	-6.06	-6.35	-5.76	-3.82	-7.49	-7.63	-7.25
6439	209810_at	SFTPB	surfactant, pulmonary-associated protein B	-3.55	-6.26	-6.49	-6.03	-4.54	-6.63	-6.49	-6.52
8404	200795_at	SPARCL1	SPARC-like 1 (mast9, hevin)	-2.17	-6.29	-6.31	-6.47	-3.38	-6.78	-7.07	-6.97
3043	209116_x_at	HBB	hemoglobin, beta	-3.84	-6.53	-6.45	-6.1	-3.82	-7.49	-7.63	-7.25
3043	211696_x_at	HBB	hemoglobin, beta	-3.48	-6.47	-6.66	-5.95	-3.82	-7.49	-7.63	-7.25
972	209619_at	CD74	CD74 molecule, major histocompatibility complex, class II invariant chain	-2.08	-7.08	-6.94	-7.1	-2.67	-7.65	-7.4	-7.51
7356	205725_at	SCGB1A1	secretoglobin, family 1A, member 1 (uteroglobin)	-5.1	-7.14	-6.69	-7.05	-4.85	-7.7	-7.54	-7.68

## Sheet: supplTABLE H
SUPPLEMENTARY TABLE H
logFC: logarithmic transformation (base 2) of the fold-change compared to the normal lung group
adj.P.Val: adjusted P value with the Benjamini-Hochberg method
BC: barcode pre-processing on the aggregated data set
XG: primary xenograft group
CL: cell line group
CLX: secondary xenograft group
SCLC: primary small cell lung cancer group
Gene changing in CL and CLX compared to SCLC and XG in both analyses, with/without barcode preprocessing, (adjusted P-value < 0.05)
				logFC	logFC	logFC	logFC.BC	logFC.BC	logFC.BC	adj.P.Val	adj.P.Val	adj.P.Val	adj.P.Val.BC	adj.P.Val.BC	adj.P.Val.BC
ENTREZ	Probe Set	SYMBOL	GENENAME	XGvsSCLC	CLvsSCLC	CLXvsSCLC	XGvsCL	XGvsCLX	CLXvsCL	XGvsSCLC.BC	CLvsSCLC.BC	CLXvsSCLC.BC	XGvsCL.BC	XGvsCLX.BC	CLXvsCL.BC
1028	213348_at	CDKN1C	cyclin-dependent kinase inhibitor 1C (p57, Kip2)	0.62	-3.14	-2.48	3.77	3.1	0.66	0.44	0	0	0	0	1
10799	213427_at	RPP40	ribonuclease P/MRP 40kDa subunit	0.64	1.79	1.74	-1.15	-1.1	-0.05	0.14	0	0	0	0.01	1
11001	205769_at	SLC27A2	solute carrier family 27 (fatty acid transporter), member 2	1.09	2.45	2.74	-1.36	-1.65	0.29	0.11	0	0	0.05	0.01	1
2149	203989_x_at	F2R	coagulation factor II (thrombin) receptor	0.6	1.86	1.74	-1.27	-1.14	-0.13	0.34	0	0	0.03	0.05	1
23564	215537_x_at	DDAH2	dimethylarginine dimethylaminohydrolase 2	-0.62	-2.14	-2.06	1.51	1.44	0.08	0.28	0	0	0	0	1
23564	202262_x_at	DDAH2	dimethylarginine dimethylaminohydrolase 2	-0.57	-1.82	-2.02	1.26	1.46	-0.2	0.33	0	0	0.02	0	1
2574	207739_s_at	GAGE2A	G antigen 2A	-0.36	3.95	4.04	-4.31	-4.4	0.09	0.84	0.01	0	0	0	1
2579	208235_x_at	GAGE7	G antigen 7	-1.18	3.35	3.59	-4.53	-4.77	0.24	0.48	0.03	0.02	0	0	1
29760	207655_s_at	BLNK	B-cell linker	0.11	-0.99	-0.96	1.1	1.07	0.03	0.83	0.02	0.02	0	0.01	1
347	201525_at	APOD	apolipoprotein D	-0.43	-2.41	-1.83	1.98	1.4	0.58	0.57	0	0.01	0	0.04	1
3487	201508_at	IGFBP4	insulin-like growth factor binding protein 4	-0.99	-2.72	-2.57	1.73	1.58	0.16	0.16	0	0	0.01	0.01	1
3709	202660_at	ITPR2	inositol 1,4,5-triphosphate receptor, type 2	0.26	1.65	1.53	-1.38	-1.27	-0.12	0.72	0.01	0.01	0.03	0.04	1
4070	202286_s_at	TACSTD2	tumor-associated calcium signal transducer 2	-1.51	-4.33	-3.8	2.82	2.29	0.53	0.05	0	0	0	0	1
4072	201839_s_at	TACSTD1	tumor-associated calcium signal transducer 1	-1.52	-5.5	-4.38	3.98	2.87	1.12	0.31	0	0	0	0.04	1
793	205626_s_at	CALB1	calbindin 1, 28kDa	-0.03	1.77	1.32	-1.8	-1.35	-0.45	0.96	0	0.02	0	0.01	1
8492	205515_at	PRSS12	protease, serine, 12 (neurotrypsin, motopsin)	0.26	1.68	1.74	-1.43	-1.49	0.06	0.7	0	0	0.01	0.01	1
Gene changing in CL and CLX compared to SCLC and XG only in the analysis without barcode preprocessing (adjuste P-value < 0.05). These genes are missing in the barcode aggregated data set.
				logFC	logFC	logFC	logFC	logFC	logFC	adj.P.Val	adj.P.Val	adj.P.Val	adj.P.Val	adj.P.Val	adj.P.Val
ENTREZ	Probe Set	SYMBOL	GENENAME	XGvsSCLC	CLvsSCLC	CLXvsSCLC	XGvsCL	XGvsCLX	CLXvsCL	XGvsSCLC	CLvsSCLC	CLXvsSCLC	XGvsCL	XGvsCLX	CLXvsCL
1465	200621_at	CSRP1	cysteine and glycine-rich protein 1	-0.37	-2.97	-2.66	2.6	2.29	0.31	0.63	0	0	0	0	1
6282	200660_at	S100A11	S100 calcium binding protein A11	-1.47	-3.58	-3.34	2.11	1.86	0.25	0.18	0	0	0.01	0.01	1
2934	200696_s_at	GSN	gelsolin (amyloidosis, Finnish type)	-0.51	-1.69	-1.3	1.18	0.8	0.38	0.39	0	0.02	0	0.04	0.91
9516	200704_at	LITAF	lipopolysaccharide-induced TNF factor	-1.38	-4.07	-3.64	2.69	2.26	0.43	0.07	0	0	0	0	0.98
5720	200814_at	PSME1	proteasome (prosome, macropain) activator subunit 1 (PA28 alpha)	-0.31	-1.38	-1.22	1.07	0.92	0.15	0.62	0.01	0.03	0.01	0.02	1
3735	200840_at	KARS	lysyl-tRNA synthetase	0.62	1.38	1.62	-0.76	-1.01	0.25	0.12	0	0	0.01	0	0.95
2034	200878_at	EPAS1	endothelial PAS domain protein 1	-1.07	-4.01	-3.91	2.94	2.84	0.1	0.27	0	0	0	0	1
894	200951_s_at	CCND2	cyclin D2	2.29	5.04	4.49	-2.75	-2.2	-0.55	0.13	0	0	0.01	0.04	1
999	201131_s_at	CDH1	cadherin 1, type 1, E-cadherin (epithelial)	-1.78	-4.86	-4.67	3.08	2.89	0.19	0.25	0	0	0	0	1
3710	201187_s_at	ITPR3	inositol 1,4,5-triphosphate receptor, type 3	-1.26	-3.52	-2.81	2.26	1.54	0.72	0.13	0	0	0	0.01	0.75
5306	201190_s_at	PITPNA	phosphatidylinositol transfer protein, alpha	0.24	1.31	1.12	-1.07	-0.87	-0.19	0.66	0.01	0.02	0	0.01	1
327	201284_s_at	APEH	N-acylaminoacyl-peptide hydrolase	0.16	0.97	0.86	-0.81	-0.7	-0.11	0.73	0.01	0.03	0	0.01	1
9791	201433_s_at	PTDSS1	phosphatidylserine synthase 1	0.5	1.14	1.02	-0.65	-0.53	-0.12	0.12	0	0	0	0.02	1
7045	201506_at	TGFBI	transforming growth factor, beta-induced, 68kDa	-1.2	-3.07	-2.99	1.87	1.79	0.08	0.14	0	0	0	0	1
3880	201650_at	KRT19	keratin 19	-1.02	-3.33	-3.3	2.31	2.29	0.02	0.46	0.01	0.01	0.01	0.01	1
4725	201757_at	NDUFS5	NADH dehydrogenase (ubiquinone) Fe-S protein 5, 15kDa (NADH-coenzyme Q reductase)	0.4	1.06	0.96	-0.66	-0.56	-0.1	0.31	0	0.01	0.01	0.03	1
822	201850_at	CAPG	capping protein (actin filament), gelsolin-like	-0.82	-1.83	-1.98	1.01	1.16	-0.15	0.14	0	0	0.01	0	1
1026	202284_s_at	CDKN1A	cyclin-dependent kinase inhibitor 1A (p21, Cip1)	-1.04	-2.5	-2.26	1.46	1.22	0.24	0.23	0	0.01	0.02	0.04	1
4351	202472_at	MPI	mannose phosphate isomerase	0.58	1.51	1.64	-0.93	-1.07	0.13	0.17	0	0	0	0	1
6840	202566_s_at	SVIL	supervillin	0.01	-2.23	-2.43	2.24	2.44	-0.2	1	0.01	0	0	0	1
11142	202732_at	PKIG	protein kinase (cAMP-dependent, catalytic) inhibitor gamma	-0.81	-2	-1.92	1.19	1.11	0.08	0.25	0	0	0.02	0.02	1
7867	202787_s_at	MAPKAPK3	mitogen-activated protein kinase-activated protein kinase 3	0.72	1.71	1.74	-0.99	-1.02	0.03	0.13	0	0	0	0	1
6507	202800_at	SLC1A3	solute carrier family 1 (glial high affinity glutamate transporter), member 3	0.58	1.8	2.26	-1.21	-1.68	0.47	0.26	0	0	0	0	0.69
2877	202831_at	GPX2	glutathione peroxidase 2 (gastrointestinal)	-0.45	-2.54	-2.06	2.09	1.6	0.48	0.7	0.01	0.04	0	0.03	1
140885	202895_s_at	SIRPA	signal-regulatory protein alpha	0.31	-1.49	-1.26	1.81	1.57	0.24	0.66	0.02	0.04	0	0	1
8835	203372_s_at	SOCS2	suppressor of cytokine signaling 2	0.49	2.94	2.51	-2.45	-2.02	-0.43	0.67	0	0.01	0	0	1
6430	203380_x_at	SFRS5	splicing factor, arginine/serine-rich 5	-0.66	-1.63	-1.64	0.97	0.98	-0.01	0.22	0	0	0.01	0.01	1
3280	203395_s_at	HES1	hairy and enhancer of split 1, (Drosophila)	-0.25	-2.57	-1.83	2.32	1.58	0.74	0.79	0	0.02	0	0	0.72
19	203504_s_at	ABCA1	ATP-binding cassette, sub-family A (ABC1), member 1	-0.53	-1.88	-1.57	1.35	1.04	0.3	0.43	0	0.01	0	0.02	1
10974	203571_s_at	C10orf116	chromosome 10 open reading frame 116	-0.33	-2.1	-1.97	1.76	1.64	0.13	0.69	0	0.01	0	0	1
6729	203605_at	SRP54	signal recognition particle 54kDa	-0.85	-1.52	-1.77	0.67	0.92	-0.25	0.06	0	0	0.05	0	0.98
788	203658_at	SLC25A20	solute carrier family 25 (carnitine/acylcarnitine translocase), member 20	0.31	0.95	0.98	-0.63	-0.67	0.03	0.42	0.01	0.01	0.02	0.01	1
1352	203858_s_at	COX10	COX10 homolog, cytochrome c oxidase assembly protein, heme A: farnesyltransferase (yeast)	0.21	1.12	1.13	-0.91	-0.93	0.01	0.59	0	0	0	0	1
54475	203867_s_at	NLE1	notchless homolog 1 (Drosophila)	0.61	1.46	1.6	-0.84	-0.99	0.14	0.23	0	0	0.02	0	1
9435	203921_at	CHST2	carbohydrate (N-acetylglucosamine-6-O) sulfotransferase 2	0.7	1.6	1.7	-0.9	-1	0.1	0.23	0	0	0.03	0.01	1
5664	204261_s_at	PSEN2	presenilin 2 (Alzheimer disease 4)	0.96	1.85	2.1	-0.88	-1.14	0.26	0.06	0	0	0.02	0	1
6558	204404_at	SLC12A2	solute carrier family 12 (sodium/potassium/chloride transporters), member 2	0.41	1.42	1.08	-1.01	-0.67	-0.34	0.42	0	0.02	0	0.05	0.89
393	204425_at	ARHGAP4	Rho GTPase activating protein 4	-0.64	-1.47	-1.32	0.82	0.68	0.15	0.16	0	0	0.01	0.03	1
2669	204472_at	GEM	GTP binding protein overexpressed in skeletal muscle	-0.44	-1.67	-1.88	1.22	1.44	-0.22	0.61	0.03	0.01	0.03	0.01	1
10610	204542_at	ST6GALNAC2	ST6 (alpha-N-acetyl-neuraminyl-2,3-beta-galactosyl-1,3)-N-acetylgalactosaminide alpha-2,6-sialyltransferase 2	0.52	-1.49	-1.31	2.01	1.83	0.18	0.43	0.02	0.03	0	0	1
11237	204669_s_at	RNF24	ring finger protein 24	-0.42	-1.6	-1.3	1.18	0.88	0.3	0.54	0.01	0.03	0.01	0.05	1
3177	204717_s_at	SLC29A2	solute carrier family 29 (nucleoside transporters), member 2	0.4	1.29	1.47	-0.9	-1.07	0.17	0.51	0.02	0.01	0.03	0	1
1396	205081_at	CRIP1	cysteine-rich protein 1 (intestinal)	-0.55	-3.89	-3.4	3.34	2.85	0.49	0.67	0	0	0	0	1
5742	205128_x_at	PTGS1	prostaglandin-endoperoxide synthase 1 (prostaglandin G/H synthase and cyclooxygenase)	-0.29	-1.75	-1.84	1.46	1.54	-0.09	0.67	0	0	0	0	1
10360	205129_at	NPM3	nucleophosmin/nucleoplasmin, 3	-0.08	1.1	1.15	-1.18	-1.23	0.05	0.86	0.01	0	0	0	1
6338	205464_at	SCNN1B	sodium channel, nonvoltage-gated 1, beta (Liddle syndrome)	0.64	-1.4	-1.13	2.04	1.76	0.27	0.29	0.02	0.05	0	0	1
50628	205527_s_at	GEMIN4	gem (nuclear organelle) associated protein 4	0.32	1.32	1.32	-1	-1	0	0.58	0.01	0.01	0.01	0	1
7410	205536_at	VAV2	vav 2 guanine nucleotide exchange factor	-0.04	-1.41	-0.98	1.38	0.94	0.44	0.96	0	0.05	0	0.01	0.75
8534	205567_at	CHST1	carbohydrate (keratan sulfate Gal-6) sulfotransferase 1	-0.24	-1.18	-1.43	0.94	1.19	-0.25	0.71	0.04	0.01	0.02	0	1
4920	205578_at	ROR2	receptor tyrosine kinase-like orphan receptor 2	-0.49	-1.71	-1.55	1.22	1.07	0.15	0.38	0	0	0	0	1
27077	205662_at	B9D1	B9 protein domain 1	0.41	1.66	1.56	-1.25	-1.16	-0.1	0.57	0.01	0.01	0.01	0.01	1
1852	205777_at	DUSP9	dual specificity phosphatase 9	0.49	1.36	1.42	-0.88	-0.94	0.06	0.34	0	0	0.01	0	1
4804	205858_at	NGFR	nerve growth factor receptor (TNFR superfamily, member 16)	-0.36	-1.12	-1.23	0.76	0.88	-0.11	0.48	0.02	0.01	0.03	0.01	1
136	205891_at	ADORA2B	adenosine A2b receptor	1.47	2.84	3.16	-1.37	-1.69	0.32	0.06	0	0	0.02	0	1
58495	206048_at	OVOL2	ovo-like 2 (Drosophila)	-0.82	-2.26	-2.09	1.43	1.26	0.17	0.36	0.01	0.01	0.02	0.04	1
956	206191_at	ENTPD3	ectonucleoside triphosphate diphosphohydrolase 3	0.05	-1.13	-0.85	1.18	0.9	0.28	0.93	0.01	0.05	0	0	0.94
26576	206216_at	SRPK3	SFRS protein kinase 3	0.21	-1.18	-1.18	1.38	1.38	0	0.71	0.01	0.01	0	0	1
116	206281_at	ADCYAP1	adenylate cyclase activating polypeptide 1 (pituitary)	-0.35	-1.65	-1.62	1.3	1.27	0.03	0.59	0	0	0	0	1
773	206399_x_at	CACNA1A	calcium channel, voltage-dependent, P/Q type, alpha 1A subunit	-0.7	-4	-3.36	3.3	2.66	0.64	0.56	0	0	0	0	0.96
6096	206443_at	RORB	RAR-related orphan receptor B	1.14	3.2	3.03	-2.06	-1.89	-0.17	0.11	0	0	0	0	1
11156	206574_s_at	PTP4A3	protein tyrosine phosphatase type IVA, member 3	-1.08	-2.65	-2.33	1.57	1.25	0.32	0.2	0	0	0.01	0.03	1
8092	206837_at	ALX1	ALX homeobox 1	0.57	1.64	1.7	-1.07	-1.13	0.06	0.46	0.02	0.02	0.05	0.03	1
7903	206925_at	ST8SIA4	ST8 alpha-N-acetyl-neuraminide alpha-2,8-sialyltransferase 4	0.34	1.18	1.21	-0.84	-0.87	0.02	0.59	0.04	0.03	0.05	0.03	1
3948	207022_s_at	LDHC	lactate dehydrogenase C	0.42	0.98	0.98	-0.56	-0.56	0	0.26	0.01	0.01	0.04	0.03	1
2180	207275_s_at	ACSL1	acyl-CoA synthetase long-chain family member 1	0.77	1.96	2.07	-1.19	-1.29	0.1	0.32	0.01	0	0.03	0.01	1
4100	207325_x_at	MAGEA1	melanoma antigen family A, 1 (directs expression of antigen MZ2-E)	0.71	2.9	2.82	-2.19	-2.11	-0.08	0.5	0	0	0	0	1
10073	207438_s_at	SNUPN	snurportin 1	0.67	1.31	1.32	-0.65	-0.65	0	0.12	0	0	0.04	0.03	1
1143	207516_at	CHRNB4	cholinergic receptor, nicotinic, beta 4	-0.3	-1.58	-1.61	1.28	1.3	-0.03	0.32	0	0	0	0	1
6850	207540_s_at	SYK	spleen tyrosine kinase	-0.86	-2.25	-2.22	1.4	1.36	0.03	0.19	0	0	0	0	1
574	207712_at	BAGE	B melanoma antigen	0.31	2.65	2.18	-2.34	-1.88	-0.47	0.73	0	0	0	0	0.96
11228	207754_at	RASSF8	Ras association (RalGDS/AF-6) domain family (N-terminal) member 8	1.18	2.44	2.76	-1.25	-1.58	0.33	0.14	0	0	0.03	0	1
8091	208025_s_at	HMGA2	high mobility group AT-hook 2	1.39	3.48	3.8	-2.09	-2.41	0.32	0.33	0.01	0	0.04	0.01	1
5990	208031_s_at	RFX2	regulatory factor X, 2 (influences HLA class II expression)	-0.04	-1.24	-1.43	1.21	1.4	-0.19	0.95	0.01	0	0	0	1
2196	208153_s_at	FAT2	FAT tumor suppressor homolog 2 (Drosophila)	-0.22	-1.15	-0.97	0.94	0.75	0.19	0.6	0	0.01	0	0	1
51599	208190_s_at	LSR	lipolysis stimulated lipoprotein receptor	-0.41	-2.01	-2.13	1.6	1.72	-0.13	0.69	0.03	0.02	0.02	0.01	1
5140	208591_s_at	PDE3B	phosphodiesterase 3B, cGMP-inhibited	0.51	1.76	1.42	-1.24	-0.91	-0.34	0.34	0	0	0	0.01	0.94
6731	208800_at	SRP72	signal recognition particle 72kDa	0.82	1.71	1.79	-0.89	-0.97	0.08	0.08	0	0	0.01	0	1
7818	208822_s_at	DAP3	death associated protein 3	0.56	1.54	1.68	-0.98	-1.12	0.14	0.14	0	0	0	0	1
5162	208911_s_at	PDHB	pyruvate dehydrogenase (lipoamide) beta	0.17	0.99	1.01	-0.82	-0.84	0.01	0.7	0.01	0.01	0	0	1
5860	209123_at	QDPR	quinoid dihydropteridine reductase	0.57	1.79	1.7	-1.21	-1.13	-0.08	0.34	0	0	0	0	1
7852	209201_x_at	CXCR4	chemokine (C-X-C motif) receptor 4	-0.5	-3.75	-3.05	3.26	2.56	0.7	0.71	0	0.01	0	0	0.96
3400	209291_at	ID4	inhibitor of DNA binding 4, dominant negative helix-loop-helix protein	-0.03	-2.48	-2.85	2.46	2.82	-0.36	0.99	0.04	0.02	0	0	1
9595	209606_at	PSCDBP	pleckstrin homology, Sec7 and coiled-coil domains, binding protein	-0.61	-1.33	-1.36	0.72	0.75	-0.03	0.18	0	0	0.03	0.01	1
64087	209623_at	MCCC2	methylcrotonoyl-Coenzyme A carboxylase 2 (beta)	0.29	0.95	0.97	-0.66	-0.69	0.02	0.54	0.03	0.02	0.04	0.02	1
8824	209668_x_at	CES2	carboxylesterase 2 (intestine, liver)	0.08	0.92	0.85	-0.84	-0.77	-0.07	0.86	0.01	0.01	0	0	1
6489	210073_at	ST8SIA1	ST8 alpha-N-acetyl-neuraminide alpha-2,8-sialyltransferase 1	1.68	3.53	3.33	-1.86	-1.65	-0.21	0.1	0	0	0.01	0.02	1
7727	210291_s_at	ZNF174	zinc finger protein 174	0.62	1.96	1.65	-1.34	-1.03	-0.31	0.14	0	0	0	0	0.87
1672	210397_at	DEFB1	defensin, beta 1	0.13	-1.66	-1.61	1.79	1.74	0.05	0.86	0.01	0.01	0	0	1
5026	210448_s_at	P2RX5	purinergic receptor P2X, ligand-gated ion channel, 5	-0.18	1.34	1.37	-1.51	-1.55	0.04	0.81	0.04	0.03	0	0	1
3983	210461_s_at	ABLIM1	actin binding LIM protein 1	-0.06	1.62	1.81	-1.68	-1.87	0.19	0.95	0.05	0.02	0	0	1
634	210610_at	CEACAM1	carcinoembryonic antigen-related cell adhesion molecule 1 (biliary glycoprotein)	-0.33	-1.12	-1.02	0.8	0.69	0.1	0.51	0.02	0.02	0.02	0.03	1
7020	210669_at	TFAP2A	transcription factor AP-2 alpha (activating enhancer binding protein 2 alpha)	-0.08	-1.87	-1.78	1.79	1.7	0.08	0.94	0.04	0.04	0	0	1
10653	210715_s_at	SPINT2	serine peptidase inhibitor, Kunitz type, 2	-1.7	-4.3	-4.03	2.61	2.34	0.27	0.13	0	0	0	0	1
7080	211024_s_at	NKX2-1	NK2 homeobox 1	-0.68	-3.08	-2.89	2.4	2.21	0.19	0.58	0.01	0.01	0	0	1
1305	211343_s_at	COL13A1	collagen, type XIII, alpha 1	-0.07	-1.68	-1.61	1.61	1.55	0.07	0.93	0.01	0.01	0	0	1
399665	212400_at	FAM102A	family with sequence similarity 102, member A	-0.82	-1.58	-1.54	0.76	0.72	0.04	0.06	0	0	0.02	0.02	1
5362	213030_s_at	PLXNA2	plexin A2	-0.37	-1.63	-1.46	1.27	1.09	0.18	0.56	0	0.01	0	0.01	1
9957	213991_s_at	HS3ST1	heparan sulfate (glucosamine) 3-O-sulfotransferase 1	0.07	-1.78	-1.75	1.86	1.82	0.04	0.94	0.03	0.03	0	0	1
4637	214002_at	MYL6	myosin, light chain 6, alkali, smooth muscle and non-muscle	-0.45	-1.1	-1.28	0.66	0.83	-0.18	0.27	0	0	0.02	0	1
6262	214044_at	RYR2	ryanodine receptor 2 (cardiac)	0.12	1.24	1.02	-1.12	-0.9	-0.23	0.8	0	0.01	0	0	0.98
10882	214346_at	C1QL1	complement component 1, q subcomponent-like 1	-0.37	-1.81	-1.96	1.45	1.6	-0.15	0.57	0	0	0	0	1
7170	214365_at	TPM3	tropomyosin 3	-0.21	0.73	0.79	-0.95	-1.01	0.06	0.53	0.02	0.01	0	0	1
797	214636_at	CALCB	calcitonin-related polypeptide beta	0.42	2.6	1.58	-2.18	-1.16	-1.01	0.6	0	0.02	0	0.02	0.26
4168	214884_at	MCF2	MCF.2 cell line derived transforming sequence	0.47	1.08	0.98	-0.61	-0.51	-0.1	0.19	0	0	0.02	0.04	1
6622	215811_at	SNCA	synuclein, alpha (non A4 component of amyloid precursor)	1.02	2.46	2.26	-1.43	-1.24	-0.19	0.15	0	0	0	0.01	1
2355	218880_at	FOSL2	FOS-like antigen 2	-0.33	-1.67	-2.12	1.35	1.79	-0.45	0.65	0.01	0	0	0	0.91
57125	219700_at	PLXDC1	plexin domain containing 1	-0.62	-1.45	-1.34	0.83	0.72	0.1	0.14	0	0	0	0.01	1
57338	220188_at	JPH3	junctophilin 3	-0.21	-0.95	-1.06	0.74	0.85	-0.11	0.69	0.05	0.02	0.04	0.01	1
10016	222380_s_at	PDCD6	programmed cell death 6	-0.56	-2.2	-1.94	1.64	1.39	0.25	0.61	0.03	0.05	0.02	0.05	1
